# Supplementary material for: Is body mass index associated with symptom severity and health-related quality of life in irritable bowel syndrome? A cross-sectional study
Source: PubMed Central journal article supplement — BMJ Open. 2018 Oct 17;8(10):e019453. doi: 10.1136/bmjopen-2017-019453 (PMC6196811; doi:10.1136/bmjopen-2017-019453), 2018-10-17
Supplement: bmjopen-2017-019453.draft_revisions.pdf [file bmjopen-2017-019453.draft_revisions.pdf]

# BMJ Open

BMJ Open is committed to open peer review. As part of this commitment we make the peer review history of every article we publish publicly available.

When an article is published we post the peer reviewers' comments and the authors' responses online. We also post the versions of the paper that were used during peer review. These are the versions that the peer review comments apply to.

The versions of the paper that follow are the versions that were submitted during the peer review process. They are not the versions of record or the final published versions. They should not be cited or distributed as the published version of this manuscript.

BMJ Open is an open access journal and the full, final, typeset and author-corrected version of record of the manuscript is available on our site with no access controls, subscription charges or pay-per-view fees (<http://bmjopen.bmj.com>).

If you have any questions on BMJ Open's open peer review process please email [info.bmjopen@bmj.com](mailto:info.bmjopen@bmj.com)

# BMJ Open

## Symptom severity and health-related quality of life in patients with irritable bowel syndrome: The role of body mass index

|                                 |                                                                                                                                                                                                                                                                                                                                                                                                                        |
|---------------------------------|------------------------------------------------------------------------------------------------------------------------------------------------------------------------------------------------------------------------------------------------------------------------------------------------------------------------------------------------------------------------------------------------------------------------|
| Journal:                        | <i>BMJ Open</i>                                                                                                                                                                                                                                                                                                                                                                                                        |
| Manuscript ID                   | bmjopen-2017-019453                                                                                                                                                                                                                                                                                                                                                                                                    |
| Article Type:                   | Research                                                                                                                                                                                                                                                                                                                                                                                                               |
| Date Submitted by the Author:   | 05-Sep-2017                                                                                                                                                                                                                                                                                                                                                                                                            |
| Complete List of Authors:       | Dong, Yuanjun; Universitätsklinikum Heidelberg Medizinische Klinik, Clinic for General Internal Medizin and Psychosomatics<br>Berens, Sabrina; Universitätsklinikum Heidelberg Medizinische Klinik Eich, Wolfgang; Universitätsklinikum Heidelberg Medizinische Klinik Schaefer, Rainer; University Hospital Basel, Department of Psychosomatics<br>Tesarz, Jonas; Universitätsklinikum Heidelberg Medizinische Klinik |
| <b>Primary Subject Heading</b>: | Gastroenterology and hepatology                                                                                                                                                                                                                                                                                                                                                                                        |
| Secondary Subject Heading:      | Nutrition and metabolism, Mental health                                                                                                                                                                                                                                                                                                                                                                                |
| Keywords:                       | Irritable bowel syndrome, Abdominal pain, Obesity, Symptom score or index, Body mass index                                                                                                                                                                                                                                                                                                                             |
|                                 |                                                                                                                                                                                                                                                                                                                                                                                                                        |

SCHOLARONE™  
Manuscripts

Only

1  
2  
3 **Original Article**  
4  
5  
6  
7

8 **Symptom severity and health-related quality of life in patients with irritable bowel**  
9  
10 **syndrome: The role of body mass index**  
11  
12  
13  
14  
15

16 **Yuanjun Dong<sup>1</sup>, M.M., Sabrina Berens<sup>1</sup>, M. Sc., Wolfgang Eich<sup>1</sup>, Dr.med., Rainer**  
17 **Schaefert<sup>2</sup>, Dr.med., Jonas Tesarz<sup>1,\*</sup>, Dr.med.**  
18  
19  
20  
21  
22  
23

24 **1 Clinic for General Internal Medizin and Psychosomatics, Universitätsklinikum**  
25 **Heidelberg Medizinische Klinik, Im Neuenheimer Feld 410, 69120 Heidelberg, Germany**  
26  
27  
28

29 **2 Department of Psychosomatics, Division of Internal Medicine, University Hospital**  
30 **Basel, University of Basel, Hebelstrasse 2, CH-4031 Basel, Switzerland**  
31  
32  
33

34 **\* Corresponding Author.**  
35  
36

37 **FINANCIAL SUPPORT:** This research received no specific grant from any funding agency  
38 in the public, commercial or not-for-profit sectors.  
39  
40  
41

42 **DISCLOSURE STATEMENT:** The authors have indicated no financial conflicts of interest.  
43  
44

45 **Address correspondence to:** Jonas Tesarz, Clinic for General Internal Medizin and  
46 Psychosomatics, Universitätsklinikum Heidelberg Medizinische Klinik, Im Neuenheimer Feld  
47 410, 69120 Heidelberg, Germany. Tel: 0049 /6221/56-37862, E-mail:  
48 Jonas.Tesarz@med.uni-heidelberg.de  
49  
50  
51  
52  
53  
54  
55  
56  
57  
58  
59  
60

## Abstract

### Objective

The aim of this study was to explore the association between body mass index (BMI), symptom severity and health-related quality of life (QoL) in different subtypes of patients with irritable bowel syndrome (IBS).

### Methods

A cross-sectional study was carried out in patients visiting our outpatient Functional Gastrointestinal Disorders specialty clinic. IBS diagnosis was made based on ROME III criteria. Abdominal pain and IBS symptom severity were investigated using the IBS severity score system (IBS-SSS). QoL was assessed using the Short-Form-36-Health-Survey (SF-36). This study was approved by the Ethics Committee of Heidelberg University (S-041/2014) and carried out in accordance with the Declaration of Helsinki.

### Results

Excluding 113 patients who had missing Rome III data and 38 patients who had missing BMI data, a total of 325 patients with IBS were included. The most frequent IBS subtype was mixed IBS (IBS-M, 45.5%), followed by diarrhoea predominant IBS (IBS-D, 41.2%) and constipation predominant IBS (IBS-C, 10.8%). Overall, 54.2% of patients with IBS were in the normal weight range, 33.8% were overweight or obese, and 12.0% were underweight. The percentage of obese patients was highest in the IBS-D subgroup (20.1%,  $p < 0.01$ ). With regard to the different BMI groups, there was no difference in IBS-SSS or abdominal pain. In the subgroup of obese patients, we found a correlation between BMI and impaired physical,

1  
2  
3 but not mental, QoL. Interestingly, different pain distribution patterns were found for the  
4  
5  
6 different BMI groups.  
7

## 8 **Conclusion**

9  
10 Our findings add to the evidence that nutritional balance is disturbed in patients with IBS.  
11  
12 Our findings emphasize that patients with IBS that are overweight or obese may have reduced  
13  
14 physical quality of life.  
15  
16  
17  
18  
19  
20

## 21 **Keywords:**

22  
23 Irritable bowel syndrome; Body mass index; Abdominal pain; Obesity; Symptom score or  
24  
25 index  
26  
27  
28  
29  
30

## 31 **Strengths and limitations of this study:**

32  
33  
34 **Strengths:** 1) Using a large patient cohort with a validated diagnosis of IBS based on the  
35  
36 Rome III criteria;  
37

38  
39 2) The findings add to the evidence that nutritional balance is disturbed in patients with IBS.  
40

41  
42 **Limitations:** 1) The study was cross-sectional, therefore, it is impossible to infer causation;  
43

44 2) BMI was based on the self-reported height and weight of patients and computed without  
45  
46 objective measurement, therefore bias may have been introduced.  
47  
48  
49  
50  
51  
52  
53  
54  
55  
56  
57  
58  
59  
60

## 1 Introduction

Irritable bowel syndrome (IBS) is a chronic and common functional bowel disorder that is characterized by recurrent abdominal pain or discomfort associated with altered bowel habits [1]. According to the Rome criteria, IBS is classified into four subtypes [IBS with diarrhoea (IBS-D), IBS with constipation (IBS-C), mixed IBS (IBS-M) and un-subtyped IBS (IBS-U)] based on the predominant bowel habits [1]. The distribution of IBS subtypes differs in different studies and probably depends on the population investigated, geographic location and definition used for each subtype [2, 3]. Each of the subtypes of IBS are associated with different eating habits and IBS symptoms that have far-reaching consequences on patients' nutritional status as well as on their quality of life. However, nutritional status may also independently modulate IBS symptoms and patient quality of life. So far, however, very little attention has been paid to the role of nutritional status on health-related quality of life and symptom severity in patients with IBS.

Epidemiologic studies have shown that as many as 10-25% of adults in European countries are obese [body mass index (BMI) > 30 kg/m<sup>2</sup>] and that the incidence of obesity is increasing [4]. Additionally, a cross-sectional multicentre study found that more than 63% of outpatients and 80% of inpatients in gastroenterological centres suffered from significant changes in body composition [5]. However, although extensive research has been carried out on the prevalence of overweight and obesity in the general population and in connection with numerous diseases, to date, there is little published data on the prevalence and clinical relevance of nutritional status in patients with IBS. Locke *et al.* [6] found no association

1  
2  
3 between IBS status and BMI. Thus far, there have been very few studies with a large enough  
4  
5 sample size that compare differences between different IBS subtypes. In particular, little is  
6  
7 known about the influence of BMI on quality of life in patients with IBS.  
8  
9

10  
11 It has been frequently reported that IBS leads to impaired quality of life [7-9]. An  
12  
13 underweight (BMI < 18.5 kg/m<sup>2</sup>) or obese body condition (BMI > 30 kg/m<sup>2</sup>) have both been  
14  
15 found to be associated with multiple abdominal symptoms leading to reduced quality of life  
16  
17 [10, 11]. Abdominal pain, the major symptom of IBS, is considered to be the most important  
18  
19 factor affecting patients' quality of life [12, 13]. In the latest Rome IV criteria, the outstanding  
20  
21 role of pain in IBS has been fully emphasized [14], and experts highlight the significance of  
22  
23 pain in IBS for diagnosis as well as therapy [15]. Researchers have found that pain sensitivity  
24  
25 is an independent factor contributing to IBS symptoms [16]. However, data on differences  
26  
27 between different IBS subtypes are sparse, and thus far, relatively little attention has been paid  
28  
29 to the association of nutritional status with differences in pain location in different IBS  
30  
31 subtypes.  
32  
33  
34  
35  
36  
37  
38

39 IBS is a heterogeneous disease and is often differentiated into different IBS subtypes in  
40  
41 studies because of the different expected aetiologies, severity levels and levels of impairment  
42  
43 [17]. Therefore, the aim of this study is to determine the effect of BMI on IBS symptom  
44  
45 severity and quality of life for each subtype of IBS based on the Rome III criteria.  
46  
47  
48  
49  
50  
51

## 52 **2 Methods**

53

54 This cross-sectional survey included patients evaluated at the Functional Gastrointestinal  
55  
56  
57  
58  
59  
60

1  
2  
3 Disorders (FGIDs) specialty clinic of the Department of General Internal Medicine and  
4  
5 Psychosomatics of Heidelberg University Hospital, which is a tertiary care facility. All  
6  
7 patients who completed our routine baseline documentation were enrolled. The routine data  
8  
9 from individual health records was transferred into the database and pseudonymized. This  
10  
11 study was approved by the Ethics Committee of Heidelberg University (S-041/2014) and  
12  
13 carried out in accordance with the Declaration of Helsinki.  
14  
15  
16  
17  
18  
19  
20

## 21 **2.1 Patients recruitment**

22  
23 From 01/2011 to 12/2016, patients' clinical data were consecutively collected from our  
24  
25 outpatient FGIDs clinic at Heidelberg University Hospital for this explorative and descriptive  
26  
27 study. All patients  $\geq 18$  years of age were included, if they fulfilled the Rome III criteria for  
28  
29 the diagnosis of IBS [1]. The subtype criteria for IBS were based on stool consistency as  
30  
31 the diagnosis of IBS [1]. The subtype criteria for IBS were based on stool consistency as  
32  
33 assessed by the Bristol Stool Scale (BSS) and Rome III criteria [18]. Demographic data  
34  
35 including gender, age, family status, level of education and residence, was also collected at  
36  
37 baseline using the Psychosomatic Basis Documentation Questionnaire (Psy-BaDo) [19].  
38  
39  
40  
41  
42  
43

## 44 **2.2 Measurement of IBS symptom severity and pain**

45  
46 Patients rated the severity of their IBS symptoms by completing the IBS severity score  
47  
48 system (IBS-SSS) [20]. The IBS-SSS has a maximum score of 500 and comprises five items:  
49  
50 frequency and intensity of abdominal pain, severity of abdominal distension, dissatisfaction  
51  
52 with bowel habits, and interference of IBS with daily life. Based on validated cut-off values,  
53  
54  
55  
56  
57  
58  
59  
60



1  
2  
3 three IBS severity subgroups can be distinguished: Mild (IBS-SSS: 75-175), Moderate  
4 (IBS-SSS: 175-300) and Severe (IBS-SSS: > 300). This questionnaire can also be used to  
5  
6 assess the intensity of abdominal pain, with scores ranging from 0 (“no pain”) to 100 (“worst  
7  
8 pain”). The pain location (right upper abdomen, middle upper abdomen, left upper abdomen,  
9  
10 middle navel, right lower abdomen, middle lower abdomen and left lower abdomen) and  
11  
12 number of painful areas (ranging from 0 to 7) are also recorded. The German version of this  
13  
14 questionnaire was validated by Betz et al. [21] and the total score was computed in  
15  
16 accordance with the manual.  
17  
18  
19  
20  
21  
22  
23  
24  
25

### 26 **2.3 Measurement of BMI**

27  
28 In the context of self-reporting, BMI was calculated as the individual's body weight (kg)  
29  
30 divided by the square of their height (m). BMI was categorized according to the World Health  
31  
32 Organization (WHO) classification of physical status [22]: underweight (BMI < 18.5 kg/m<sup>2</sup>),  
33  
34 normal weight (BMI 18.5–25 kg/m<sup>2</sup>), overweight (25–30 kg/m<sup>2</sup>), or obese (BMI > 30 kg/m<sup>2</sup>).  
35  
36  
37  
38  
39  
40  
41

### 42 **2.4 Measurement of quality of life**

43  
44 Quality of life was measured using the Short Form 36 Health Survey (SF-36) [23]. SF-36  
45  
46 is a 36 item, patient-reported survey of patient health-related quality of life, which consists of  
47  
48 a physical health index and mental health index. Each scale is directly transformed into a  
49  
50 0-100 scale. Lower scores represent a higher degree of disability. The SF-36 is widely used  
51  
52 and well validated for assessing generic health outcomes. Validation of the German version  
53  
54  
55  
56  
57  
58  
59  
60

1  
2  
3 was performed by Morfeld *et al.* [24].  
4  
5  
6  
7

## 8 **2.5 Statistical analysis**

9

10  
11 Routine data were transformed into an SPSS file and evaluated using the statistical  
12  
13 program SPSS (IBM, version 22.0). Descriptive statistics are presented as the means and  
14  
15 standard deviation for continuous variables and as absolute numbers and percentages for  
16  
17 categorical variables. All analyses were explorative and not of a confirmatory nature. All  
18  
19 primary and secondary variables were first tested for normal distribution. For normally  
20  
21 distributed variables, the mean and standard deviation (SD) were calculated. Variables that  
22  
23 lacked a normal distribution were reported using the median and interquartile range. The  
24  
25 Mann-Whitney U Test was used to assess the level of significance because not all the data  
26  
27 were normally distributed and a number of participants differed between the groups.  
28  
29  
30  
31  
32  
33

34 Comparison of socio-demographical and anthropometric data according to BMI was  
35  
36 performed using analysis of variance (ANOVA) and nonparametric tests in the first instance.  
37  
38 Where significant group differences were detected based on ANOVA, post-hoc least significant  
39  
40 difference tests were conducted to compare the study groups in a pairwise fashion. Associations  
41  
42 with BMI were investigated using the WHO categories (normal weight as the reference group)  
43  
44 and the continuous BMI variable. We also used the Pearson and Spearman correlation  
45  
46 coefficients to investigate the linear association between demographics, clinical and  
47  
48 psychological features.  
49  
50  
51  
52  
53

54 Because of the explorative nature of the study, we abstained from adjustment for  
55  
56  
57  
58  
59  
60

multiple testing and interpreted *p* values cautiously as descriptive measures of effect. For dichotomous data the odds ratio (OR) was calculated and reported with a 95% confidence interval (CI). All tests were two-sided and statistical significance was accepted if  $p < 0.05$ .

### 3 Results

#### 3.1 Characteristics of study sample

A total of 576 patients completed the questionnaire from 01/2011-12/2016. Excluding 113 patients who were missing Rome III data and 38 patients who were missing BMI data, eventually 325 patients with IBS were enrolled in this study (98 males, 227 females; mean BMI  $23.91 \pm 5.54$  kg/m<sup>2</sup>). The demographic and baseline symptom profile of the patients with IBS among the different subtypes are summarized in Table 1. Of the included subjects, the most frequent IBS subtype was IBS-M (45.5%), followed by IBS-D (41.2%), and IBS-C (10.8%). Only 54.2% of patients with IBS were within the normal weight range, whereas 33.8% were overweight or obese, and only a minority were underweight (12.0%). Taking gender into account, 6.1% of males and 14.5% of females were underweight. Additionally, 8.2% of males and 14.5% of females were obese and 29.6% of males and 17.6% of females were overweight. Interestingly, this distribution pattern was similar between the different IBS groups. In particular there was no difference between the IBS-C and IBS-M groups. In the IBS-D group the percentage of obese patients reached 20.1%. There were no significant differences between the BMI groups with regard to pain symptoms, symptom severity or mental health, but the groups were significantly different with regard to physical health.

### 3.2 BMI and health-related quality of life in IBS subtypes

Two-way ANOVA analysis between subjects was conducted to compare the effect of BMI level on physical health in underweight, normal weight, overweight and obese conditions in each IBS subtype. There was a significant effect of BMI ( $F = 4.38, p < 0.01$ ). However, there was no significant effect of IBS subtype ( $F = 0.06, p = 0.945$ ). Post-hoc comparisons using the LSD test indicated that the mean score for obese patients ( $M = 35.08, SD = 10.02$ ) was significantly different from patient with other BMIs ( $p < 0.01$ ) with regard to physical health. However, the underweight patients ( $M = 41.97, SD = 9.02$ ) did not significantly differ from the normal weight ( $M = 40.97, SD = 8.86$ ) or overweight ( $M = 42.05, SD = 9.17$ ) patients with regard physical health. As seen in Figure 1, obese patients with IBS had worse physical health than patients with other BMIs ( $p < 0.05$ ). With regard to mental health, there was no significant relationship.

### 3.3 Correlations between demographics, clinical and psychological features

Pearson product-moment correlations (Table 2) indicated that BMI was negatively correlated with physical health (SF-36) ( $r = -0.198, p < 0.01$ ). Abdominal pain (IBS-SSS item 1b) was positively correlated with symptom severity (IBS-SSS) ( $r = 0.666, p < 0.01$ ) and number of pain locations with a range from 0 to 7 ( $r = 0.117, p < 0.05$ ). Additionally, abdominal pain was negatively correlated with physical health ( $r = -0.388, p < 0.01$ ) and mental health ( $r = -0.252, p < 0.01$ ).

### 3.4 Characteristics of IBS subtypes pain location separated by BMI

As shown in Table 3 and Figure 2, compared with normal the BMI group, underweight patients with IBS-D had significantly worse pain in the right lower abdomen (OR 3.44; 95% CI, 1.19 to 9.94) and middle lower abdomen (OR 3.99; 95% CI, 1.28 to 12.43). Similarly, underweight patients with IBS-M had significantly worse pain in the middle lower abdomen (OR 3.33; 95% CI 1.05 to 10.60). Similar analyses were also conducted to compare the overweight BMI group and obese BMI group to the normal BMI group. Of note, there was a significant association between IBS-M and middle upper abdominal pain (OR 0.35; 95% CI, 0.13 to 0.94).

## 4 Discussion

The aim of this study was to determine the effect of BMI on the relationship between symptom severity and quality of life for each subtype of IBS based on the Rome III criteria. For this purpose, we used standardized questionnaires to confirm the diagnosis and to assess patient symptoms and quality of life.

The most important findings were that 54.2% of patients with were in the range of normal weight, while 33.8% were overweight or obese and while there was no difference in symptom severity or abdominal pain between the different BMI groups, obesity was associated with reduced quality of life and a significant negative correlation between BMI and physical health was found.

1  
2  
3  
4 Our data show that being overweight is a phenomenon in patients with IBS regardless of  
5  
6 IBS subtype. These findings are in agreement with the results of a previous study based on  
7  
8 obese patients in France, which found that 30.0% of obese patients had IBS [25]. We found  
9  
10 that 54.2% of patients with IBS were in the normal weight range, which is consistent with  
11  
12 previous results [26]. What is worth noting is that the overweight and obesity rate in the  
13  
14 general adult population in Germany [27] is higher. According to the German Health Update  
15  
16 (GEDA) [27], in 2012 the overweight rate of adults was 36.2% and the obese rate was 16.5%.  
17  
18 The causal relationship between IBS and abnormal body weight are hard to elucidate.  
19  
20 However, abnormal body weight has an undeniable influence in both patients with IBS and in  
21  
22 the general population. Interestingly, the distribution of weight was similar between the  
23  
24 different IBS groups. In particular, there was no difference between the IBS-C and IBS-M  
25  
26 groups. Notably, in the IBS-D group the percentage of obese patients reached 20.1%. Lee et al.  
27  
28 [28] evaluated the relationship between visceral adipose tissue and the risk of IBS and  
29  
30 suggested that IBS-D may be more common in obese patients. This study, however, was  
31  
32 confined to patients from South Korea. Therefore, further research is needed to confirm high  
33  
34 obesity rates in patients with IBS-D with metabolic disturbances of visceral fat.  
35  
36  
37  
38  
39  
40  
41  
42  
43

44  
45 Though there was no significant difference in symptom severity or abdominal pain  
46  
47 between the different BMI groups, these groups differed significantly with regard to quality of  
48  
49 life. The obese groups were characterized by reduced physical quality of life. This is an  
50  
51 interesting but not completely new result which gives rise to the question of what mechanisms  
52  
53 are responsible for this association. Obesity may lead to more physiological stress on organs.  
54  
55  
56  
57  
58  
59  
60

1  
2  
3 Richards et al. [29] found that obese patients, when compared to normal weight participants,  
4 have more severe pain and their daily functions, such as work, study and social  
5  
6  
7  
8  
9  
10  
11  
12  
13  
14  
15  
16  
17  
18  
19  
20  
21  
22  
23  
24  
25  
26  
27  
28  
29  
30  
31  
32  
33  
34  
35  
36  
37  
38  
39  
40  
41  
42  
43  
44  
45  
46  
47  
48  
49  
50  
51  
52  
53  
54  
55  
56  
57  
58  
59  
60

Richards et al. [29] found that obese patients, when compared to normal weight participants, have more severe pain and their daily functions, such as work, study and social communications, are to a larger extent restricted. This suggests that differences in abdominal symptoms affect the quality of life of patients with IBD less than differences in BMI [30, 31].

Our data show an association between BMI and quality of life with regard to physical health. This similar to findings of previous studies [11], in that increasing BMI is associated with increased upper gastrointestinal symptoms, bloating, and diarrhoea. Our results suggest that higher BMI adversely affects patients' physical health in IBS. Of note, however, BMI has to exceed a certain threshold so that an effect can be seen. A BMI up to the limit of < 30 kg/m<sup>2</sup> did not significantly decrease the quality of life with regard to physical health in patients with IBS. An additional finding was that BMI had no effect on the quality of life with regard to mental health in patients with IBS, which requires further research. This finding is in agreement with a study by Mykletun [32], which suggested that BMI has no significant association with IBS with regard to anxiety and mood disorders. However, their study only evaluated female patients. Further study is needed in this area.

According to the Rome committee "pain" is one of the most critical diagnostic symptoms of IBS [33, 34]. Occasionally, we found that the pain location differed among IBS subtypes based on different BMI levels. To our knowledge, this finding has never been described previously. Previous studies have explored the association between obesity and IBS pain symptoms [12]. An additional finding of this study is that patients who are underweight also have specific pain characteristics. Compared with the normal BMI group, underweight

1  
2  
3 patients in the IBS-D subgroup had significantly more pain in the right upper abdomen, right  
4  
5 lower abdomen and middle lower abdomen. Similarly, underweight patients in the IBS-M  
6  
7 subgroup had significantly worse pain in the left lower abdomen and middle lower abdomen.  
8  
9 Severe pain in these areas may be associated with increased pressure in the colon and rectum  
10  
11 [35] and visceral hypersensitivity [36]. Underweight patients may suffer a more severe degree  
12  
13 of pain. Stanghellini et al. [37] reported delayed gastric emptying and functional dyspepsia  
14  
15 women with lower body weight. Delays in gastric emptying may lead to longer small intestine  
16  
17 and colon transit [38], causing more severe gastrointestinal pain in related areas. However, no  
18  
19 final conclusion has been drawn with regard to this matter and more research is needed.  
20  
21  
22  
23  
24  
25

26 There are two main limitations of this study. The study was cross-sectional, therefore, it  
27  
28 is impossible to infer causation. BMI was based on the self-reported height and weight of  
29  
30 patients and computed without objective measurement, therefore bias may have been  
31  
32 introduced. Patients may occasionally underreport or overreport their weight and height  
33  
34 leading to an underestimation of underweight or obese patients. However, in the  
35  
36 Nutrinet-Santé study, researchers reported that deviations in self-reported BMIs from  
37  
38 questionnaires can be ignored because their results confirmed the validity and agreement of  
39  
40 self-reported data with measured data [39, 40].  
41  
42  
43  
44  
45  
46

47 The strengths of this study are the use of a large patient cohort with a validated diagnosis  
48  
49 of IBS based on the Rome III criteria. The findings from this study suggest that clinical  
50  
51 doctors should pay special attention to abnormal weight in patients with IBS because this may  
52  
53 be an indicator of a poorer quality of life with regard to physical health. Our findings add to  
54  
55  
56  
57  
58  
59  
60



1  
2  
3 the evidence that nutritional balance is disturbed in patients with IBS. They emphasize that  
4  
5  
6 overweight and obesity are relevant factors in IBS, which may have a more selective  
7  
8 influence on quality of life with regard to physical health.  
9

10  
11  
12  
13  
14  
15  
16 **Declaration of personal and funding interests:** This research received no specific grant  
17  
18 from any funding agency in the public, commercial or not-for-profit sectors.  
19  
20  
21  
22

23  
24 **Conflict of interest:**

25  
26 The authors have indicated no financial conflicts of interest.  
27

28  
29 Yuanjun Dong, Jonas Tesarz, Rainer Schäefert and Wolfgang Eich designed the study and  
30  
31 wrote the protocol.  
32

33  
34 Yuanjun Dong, Sabrina Berens and Jonas Tesarz performed the literature searches and  
35  
36 analyses.  
37

38  
39 Yuanjun Dong wrote the first draft of the manuscript.  
40

41  
42 All of the authors contributed to and have approved the final manuscript.  
43  
44  
45  
46

47 **References:**

48  
49 [1] Drossman DA. The functional gastrointestinal disorders and the Rome III process.  
50  
51 *Gastroenterology* 2006;130:1377-1390.  
52  
53  
54  
55  
56  
57  
58  
59  
60

- 1  
2  
3 [2] Kibune-Nagasako C, García-Montes C, Silva-Lorena SL, et al. Irritable bowel syndrome  
4  
5 subtypes: clinical and psychological features, body mass index and comorbidities. *Revista*  
6  
7 *Española de Enfermedades Digestivas* 2016;108:59-64.  
8  
9
- 10  
11 [3] Le Pluart D, Sabaté JM, Bouchoucha M, et al. Functional gastrointestinal disorders in 35  
12  
13 447 adults and their association with body mass index. *Alimentary Pharmacology and*  
14  
15 *Therapeutics* 2015;41:758-767.  
16  
17
- 18  
19 [4] Gracey M, King M. Indigenous health part 1: determinants and disease patterns. *The Lancet*  
20  
21 2009;374:65-75.  
22  
23
- 24 [5] Rizzi M, Mazzuoli S, Regano N, et al. Undernutrition, risk of malnutrition and obesity in  
25  
26 gastroenterological patients: A multicenter study. *World journal of gastrointestinal oncology*  
27  
28 2016; 8: 563.  
29  
30
- 31 [6] Locke GR, Zinsmeister AR, Schleck CD, et al. Psychosocial distress and somatic symptoms  
32  
33 in community subjects with irritable bowel syndrome: a psychological component is the rule.  
34  
35 *The American Journal of Gastroenterology* 2009;104:1772-1779.  
36  
37
- 38  
39 [7] Lacy, Brian E. Perspective: An easier diagnosis. *Nature* 2016;533.7603: S107-S107.  
40  
41
- 42 [8] Ljótsson B, Hesser H, Andersson E, et al. Provoking symptoms to relieve symptoms: a  
43  
44 randomized controlled dismantling study of exposure therapy in irritable bowel syndrome.  
45  
46 *Behaviour Research and Therapy* 2014;55:27-39.  
47  
48
- 49 [9] Hoekman, Daniël R, et al. Annual Costs of Care for Pediatric Irritable Bowel Syndrome,  
50  
51 Functional Abdominal Pain, and Functional Abdominal Pain Syndrome. *The Journal of*  
52  
53 *Pediatrics* 2015;167.5:1103-1108.  
54  
55  
56  
57  
58  
59  
60

- 1  
2  
3 [10] van Oijen MG, Josemanders DF, Laheij RJ, van Rossum LG, Tan AC, Jansen JB.  
4 Gastrointestinal disorders and symptoms: does body mass index matter? *Neth J Med*  
5  
6 2006;64:45–49.  
7  
8  
9  
10 [11] Talley NJ, Howell S, Poulton R. Obesity and chronic gastrointestinal tract symptoms in  
11  
12 young adults: a birth cohort study. *Am J Gastroenterol* 2004;99:1807–1814.  
13  
14  
15 [12] Hungin APS, Chang L, Locke GR, et al. Irritable bowel syndrome in the United States:  
16  
17 prevalence, symptom patterns and impact. *Alimentary Pharmacology and Therapeutics*  
18  
19 2005;21:1365-1375.  
20  
21  
22 [13] Drossman DA. Functional gastrointestinal disorders: what's new for Rome IV?. *The*  
23  
24 *Lancet Gastroenterology and Hepatology* 2016;1:6-8.  
25  
26  
27 [14] Drossman DA. Functional gastrointestinal disorders: history, pathophysiology, clinical  
28  
29 features, and Rome IV. *Gastroenterology* 2016;150:1262-1279. e2.  
30  
31  
32 [15] Schmulson MJ, Drossman DA. What Is New in Rome IV. *Journal of*  
33  
34 *neurogastroenterology and motility* 2017; 23: 151.  
35  
36  
37 [16] Kanazawa M, Palsson OS, Thiwan SIM, et al. Contributions of pain sensitivity and colonic  
38  
39 motility to IBS symptom severity and predominant bowel habits. *The American journal of*  
40  
41 *gastroenterology* 2008; 103: 2550-2561.  
42  
43  
44 [17] Spiegel B, Bolus R, Harris LA, et al. Measuring irritable bowel syndrome patient-reported  
45  
46 outcomes with an abdominal pain numeric rating scale. *Alimentary pharmacology &*  
47  
48 *therapeutics* 2009; 30: 1159-1170.  
49  
50  
51 [18] Heaton KW, Gosh S. Relation between stool form on a seven point scale and symptoms of  
52  
53  
54  
55  
56  
57  
58  
59  
60

urgency, straining, and incomplete evacuation. *Gut* 1989;30:A1465-A1465.

[19] Heuft G. Praxis der Qualitätssicherung in der Psychotherapie: das Manual zur Psy-BaDo;[entsprechend den Empfehlungen der psychotherapeutischen Fachgesellschaften]. Thieme 1998.

[20] Kaptchuk TJ, Friedlander E, Kelley JM, et al. Placebos without deception: a randomized controlled trial in irritable bowel syndrome. *PloS One* 2010;5: e15591.

[21] Betz C, Mannsdörfer K, Bischoff SC. Validation of the IBS-SSS. *Zeitschrift für Gastroenterologie* 2013;51:1171-1176.

[22] World Health Organization. Physical status: The use of and interpretation of anthropometry, Report of a WHO Expert Committee 1995.

[23] Jenkinson C, Coulter A, Wright L. Short form 36 (SF36) health survey questionnaire: normative data for adults of working age. *Bmj* 1993;306:1437-1440.

[24] Morfeld M, Kirchberger I, Bullinger M. SF-36 Fragebogen zum Gesundheitszustand: Deutsche Version des Short Form-36 Health Survey. *Hogrefe* 2011.

[25] Schneck AS, Anty R, Tran A, et al. Increased Prevalence of Irritable Bowel Syndrome in a Cohort of French Morbidly Obese Patients Candidate for Bariatric Surgery. *Obesity surgery* 2016; 26: 1525-1530.

[26] Rodríguez LA. One-year follow-up of newly diagnosed irritable bowel syndrome patients *Alimentary Pharmacology and Therapeutics* 1999;13:1097-1102.

[27] Lange C, Jentsch F, Allen J, et al. Data Resource Profile: German Health Update (GEDA)—the health interview survey for adults in Germany. *International journal of*

1  
2  
3  
4  
5  
6  
7  
8  
9  
10  
11  
12  
13  
14  
15  
16  
17  
18  
19  
20  
21  
22  
23  
24  
25  
26  
27  
28  
29  
30  
31  
32  
33  
34  
35  
36  
37  
38  
39  
40  
41  
42  
43  
44  
45  
46  
47  
48  
49  
50  
51  
52  
53  
54  
55  
56  
57  
58  
59  
60

*epidemiology* 2015; 44: 442-450.

[28] Lee CG, Lee JK, Kang YS, et al. Visceral abdominal obesity is associated with an increased risk of irritable bowel syndrome. *The American journal of gastroenterology* 2015;110:310-319.

[29] Richards MM, D Adams TED, Hunt SC. Functional status and emotional well-being, dietary intake, and physical activity of severely obese subjects. *Journal of the American dietetic association* 2000;100:67-75.

[30] Canavan C, West J, Card T. Review article: the economic impact of the irritable bowel syndrome. *Alimentary Pharmacology and Therapeutics* 2014;40:1023-1034.

[31] Zhou QQ, Verne GN. New insights into visceral hypersensitivity—clinical implications in IBS. *Nature Reviews Gastroenterology and Hepatology* 2011;8:349-355.

[32] Mykletun A, Jacka F, Williams L, et al. Prevalence of mood and anxiety disorder in self reported irritable bowel syndrome (IBS). An epidemiological population based study of women. *BMC gastroenterology* 2010; 10: 88.

[33] Lacy BE. Perspective: An easier diagnosis. *Nature* 2016;533: S107-S107.

[34] Shah SS, Bhatia SJ, Mistry FP. Epidemiology of dyspepsia in the general population in Mumbai. *Indian Journal of Gastroenterology* 2001;20:103-106.

[35] Sinhamahapatra P, Saha SP, Chowdhury A, Chakrabarti SK, Ghosh A and Maiti B. Visceral afferent hypersensitivity in irritable bowel syndrome-evaluation by cerebral evoked potential after rectal stimulation. *The American journal of gastroenterology* 2001; 96: 2150-2157.

1  
2  
3 [36] Klooker TK, Braak B, Koopman KE, et al. The mast cell stabiliser ketotifen decreases  
4 visceral hypersensitivity and improves intestinal symptoms in patients with irritable bowel  
5 syndrome. *Gut* 2010; gut. 2010.213108.  
6  
7

8  
9  
10 [37] Stanghellini V, Tosetti C, Paternicò A, et al. Risk indicators of delayed gastric emptying of  
11 solids in patients with functional dyspepsia. *Gastroenterology* 1996;110:1036-1042.  
12  
13

14 [38] Simren M, Abrahamsson H, Björnsson E S. An exaggerated sensory component of the  
15 gastrocolonic response in patients with irritable bowel syndrome. *Gut* 2001; 48: 20-27.  
16  
17

18 [39] Lassale C, Péneau S, Touvier M, et al. Validity of web-based self-reported weight and  
19 height: results of the Nutrinet-Santé study. *Journal of Medical Internet Research* 2013;15:e152.  
20  
21

22 [40] Siah KTH, Wong RK, Chan YH, et al. Prevalence of irritable bowel syndrome in  
23 Singapore and its association with dietary, lifestyle, and environmental factors. *Journal of*  
24 *Neurogastroenterology and Motility* 2016;22:670-676.  
25  
26  
27  
28  
29  
30  
31  
32  
33  
34  
35  
36  
37  
38  
39  
40  
41  
42  
43  
44  
45  
46  
47  
48  
49  
50  
51  
52  
53  
54  
55  
56  
57  
58  
59  
60

## Table and Figure Legends

### Table 1. Distribution of demographic variables by BMI categories in IBS patients

a Comparison by two-tailed Fisher's exact test;

b Comparison among the four groups of BMI by one-way ANOVA.

\*  $p < 0.05$ ,

\*\*  $p < 0.05$  for post-hoc comparison between BMI < 18.5, BMI 25-30 or BMI > 30 and BMI 18.5-25.

#  $p < 0.05$  for post-hoc comparison between BMI < 18.5 and BMI > 30.

§  $p < 0.01$  for post-hoc comparison between BMI < 18.5, BMI 18.5-25 or BMI 25-30 and BMI > 30.

△ IBS-SSS: Mild (IBS-SSS: 75-175), Moderate (IBS-SSS: 175-300) and Severe (IBS-SSS: > 300).

☆ IBS-SSS: range from 0 ("no pain") to 100 ("worst pain").

† SF-36: range from 0 ("highest disability") to 100 ("no disability").

IBS-C, IBS with constipation; IBS-D, IBS with diarrhea; IBS-M, mixed IBS; BMI, body mass index;

### Table 2. Correlation Matrix for the Study Variables in IBS patients

BMI, Body mass index;

\*  $p < 0.05$ ; \*\*  $p < 0.01$

### Table 3. Association of pain locations with being underweight, overweight and obese based on BMI versus those of normal weight (Effective N=325)

IBS-C, IBS with constipation; IBS-D, IBS with diarrhea; IBS-M, mixed IBS; BMI, body mass index; OR, odds ratio; 95%CI, 95% confidence interval

### Figure 1. Estimated marginal means of physical health and mental health in each IBS subtype.

### Figure 2. Significantly different pain locations in IBS subtypes separated by BMI compared with normal weight

IBS-D, IBS with diarrhea; IBS-M, mixed IBS; BMI, body mass index

1  
2  
3  
4  
5  
6  
7  
8  
9  
10  
11  
12  
13  
14  
15  
16  
17  
18  
19  
20  
21  
22  
23  
24  
25  
26  
27  
28  
29  
30  
31  
32  
33  
34  
35  
36  
37  
38  
39  
40  
41  
42  
43  
44  
45  
46  
47  
48  
49  
50  
51  
52  
53  
54  
55  
56  
57  
58  
59  
60

For peer review only



## Tables

**Table 1. Distribution of demographic variables by BMI categories in IBS patients**

|                                   | Total                        | BMI                        |                    |                           |                    |                         |                    |                        |                    | <i>p</i> value <sup>a</sup> |
|-----------------------------------|------------------------------|----------------------------|--------------------|---------------------------|--------------------|-------------------------|--------------------|------------------------|--------------------|-----------------------------|
|                                   |                              | < 18.5 kg/m <sup>2</sup>   |                    | 18.5-25 kg/m <sup>2</sup> |                    | 25-30 kg/m <sup>2</sup> |                    | > 30 kg/m <sup>2</sup> |                    |                             |
|                                   | Effective N (%) or Mean [SD] | N (%) or Mean [SD]         | N (%) or Mean [SD] | N (%) or Mean [SD]        | N (%) or Mean [SD] | N (%) or Mean [SD]      | N (%) or Mean [SD] | N (%) or Mean [SD]     |                    |                             |
| N                                 | 325 (100.0)                  | 39 (12.0)**                | 176 (54.2)         | 69 (21.2)**               | 41 (12.6)**        |                         |                    |                        | < 0.01             |                             |
| Gender                            |                              |                            |                    |                           |                    |                         |                    |                        |                    |                             |
| Male                              | 98 (30.2)                    | 6 (6.1)                    | 55 (56.1)          | 29 (29.6)                 | 8 (8.2)            |                         |                    |                        | 0.012              |                             |
| Female                            | 227 (69.8)                   | 33 (14.5)                  | 121 (53.3)         | 40 (17.6)                 | 33 (14.5)          |                         |                    |                        |                    |                             |
| Age                               | 38.87 [15.68]                | 34.92 [15.57] <sup>#</sup> | 37.25 [15.41]      | 43.55 [15.67]**           | 41.88 [15.15]      |                         |                    |                        | 0.007 <sup>b</sup> |                             |
| Family status                     |                              |                            |                    |                           |                    |                         |                    |                        |                    |                             |
| Single                            | 149 (46.3)                   | 23 (15.4)                  | 89 (59.7)          | 27 (18.1)                 | 10 (6.7)           |                         |                    |                        | 0.011              |                             |
| Married or unmarried cohabitation | 140 (43.5)                   | 10 (7.1)                   | 68 (48.6)          | 37 (26.4)                 | 25 (17.9)          |                         |                    |                        |                    |                             |
| Divorced or widowed               | 33 (10.2)                    | 5 (15.2)                   | 18 (54.5)          | 5 (15.2)                  | 5 (15.2)           |                         |                    |                        |                    |                             |
| Education status                  |                              |                            |                    |                           |                    |                         |                    |                        |                    |                             |
| Below highschool                  | 91 (30.7)                    | 9 (9.9)                    | 50 (54.9)          | 16 (17.6)                 | 16 (17.6)          |                         |                    |                        | 0.35               |                             |
| Above highschool                  | 205 (69.3)                   | 25 (12.2)                  | 111 (54.1)         | 47 (22.9)                 | 22 (10.7)          |                         |                    |                        |                    |                             |
| IBS subtypes                      |                              |                            |                    |                           |                    |                         |                    |                        |                    |                             |
| IBS-C                             | 35 (10.8)                    | 5 (14.3)                   | 19 (54.3)          | 9 (25.7)                  | 2 (5.7)            |                         |                    |                        | 0.057              |                             |
| IBS-D                             | 134 (41.2)                   | 19 (14.2)                  | 63 (47.0)          | 25 (18.7)                 | 27 (20.1)          |                         |                    |                        |                    |                             |
| IBS-M                             | 148 (45.5)                   | 15 (10.1)                  | 88 (59.5)          | 34 (23.0)                 | 11 (7.4)           |                         |                    |                        |                    |                             |
| IBS-U                             | 8 (2.5)                      | 0 (0.0)                    | 6 (75.0)           | 1 (12.5)                  | 1 (12.5)           |                         |                    |                        |                    |                             |
| Symptom severity <sup>△</sup>     | 291.99 [84.79]               | 277.76 [72.53]             | 292.96 [86.45]     | 291.46 [85.82]            | 299.21 [84.71]     |                         |                    |                        | 0.739 <sup>b</sup> |                             |
| Abdomen pain <sup>*</sup>         | 40.57 [9.30]                 | 44.51 [23.26]              | 46.74 [25.66]      | 47.56 [30.19]             | 50.49 [26.54]      |                         |                    |                        | 0.814 <sup>b</sup> |                             |

|                              |               |                           |                           |                           |               |                    |  |
|------------------------------|---------------|---------------------------|---------------------------|---------------------------|---------------|--------------------|--|
| Quality of life <sup>†</sup> |               |                           |                           |                           |               |                    |  |
| Physical health              | 40.57 [9.30]  | 41.97 [9.02] <sup>§</sup> | 40.97 [8.86] <sup>§</sup> | 42.05 [9.17] <sup>§</sup> | 35.08 [10.02] | 0.001 <sup>b</sup> |  |
| Mental health                | 39.22 [12.69] | 36.66 [12.35]             | 39.63 [13.00]             | 39.92 [11.96]             | 38.79 [13.05] | 0.613 <sup>b</sup> |  |

**Table 2. Correlation Matrix for the Study Variables in IBS patients**

|                            |                                | BMI      | Gender | Education | Number of Pain Symptom location | Pain Symptom severity | Abdominal pain | Physical Health | Mental health |
|----------------------------|--------------------------------|----------|--------|-----------|---------------------------------|-----------------------|----------------|-----------------|---------------|
| <b>Pearson Correlation</b> | <b>BMI</b>                     | 1.000    |        |           |                                 |                       |                |                 |               |
|                            | <b>Gender</b>                  | -0.050   | 1.000  |           |                                 |                       |                |                 |               |
|                            | <b>Education</b>               | -0.080   | -0.108 | 1.000     |                                 |                       |                |                 |               |
|                            | <b>Number of Pain location</b> | -0.083   | 0.087  | 0.121*    | 1.000                           |                       |                |                 |               |
|                            | <b>Symptom severity</b>        | 0.065    | 0.059  | -0.048    | 0.094                           | 1.000                 |                |                 |               |
|                            | <b>Abdominal pain</b>          | 0.034    | 0.046  | -0.011    | 0.117*                          | 0.666**               | 1.000          |                 |               |
|                            | <b>Physical Health</b>         | -0.198** | -0.070 | 0.204**   | -0.044                          | -0.394**              | -0.388**       | 1.000           |               |
|                            | <b>Mental health</b>           | 0.037    | -0.022 | -0.040    | -0.045                          | -0.303**              | -0.252**       | 0.046           | 1.000         |

1  
2  
3  
4  
5  
6  
7  
8  
9  
10  
11  
12  
13  
14  
15  
16  
17  
18  
19  
20  
21  
22  
23  
24  
25  
26  
27  
28  
29  
30  
31  
32  
33  
34  
35  
36  
37  
38  
39  
40  
41  
42  
43  
44  
45  
46  
47

Table 3. Association of pain locations with being underweight, overweight and obese based on BMI versus those of normal weight (Effective N=325)

| IBS subtypes | Pain location        | BMI < 18.5 kg/m <sup>2</sup> |        |        |         | BMI 25-30 kg/m <sup>2</sup> |        |        |         | BMI > 30 kg/m <sup>2</sup> |        |         |         |
|--------------|----------------------|------------------------------|--------|--------|---------|-----------------------------|--------|--------|---------|----------------------------|--------|---------|---------|
|              |                      | OR value                     | 95% CI |        | P value | OR value                    | 95% CI |        | P value | OR value                   | 95% CI |         | P value |
|              |                      |                              | Lower  | Upper  |         |                             | Lower  | Upper  |         |                            | Lower  | Upper   |         |
| IBS-C        | right upper abdomen  | 2.50                         | 0.306  | 20.453 | 0.393   | 0.469                       | 0.045  | 4.931  | 0.528   | No cases                   |        |         |         |
|              | middle upper abdomen | 0.429                        | 0.04   | 4.637  | 0.486   | 0.49                        | 0.079  | 3.045  | 0.444   | No cases                   |        |         |         |
|              | left upper abdomen   | 0.700                        | 0.062  | 7.853  | 0.772   | 2.240                       | 0.424  | 11.837 | 0.342   | No cases                   |        |         |         |
|              | middle navel         | No cases                     |        |        |         | 5.143                       | 0.4    | 66.148 | 0.209   | 18.00                      | 0.585  | 553.586 | 0.098   |
|              | right lower abdomen  | 0.225                        | 0.021  | 2.405  | 0.217   | 0.450                       | 0.086  | 2.350  | 0.344   | 0.900                      | 0.049  | 16.594  | 0.944   |
|              | middle lower abdomen | No cases                     |        |        |         | 1.4                         | 0.25   | 7.83   | 0.702   | 2.800                      | 0.146  | 53.706  | 0.495   |
|              | left lower abdomen   | 0.225                        | 0.021  | 2.405  | 0.217   | 0.720                       | 0.146  | 3.544  | 0.686   | 0.900                      | 0.049  | 16.594  | 0.944   |
| IBS-D        | right upper abdomen  | 2.479                        | 0.805  | 7.632  | 0.114   | 1.653                       | 0.564  | 4.847  | 0.360   | 0.739                      | 0.215  | 2.539   | 0.631   |
|              | middle upper abdomen | 1.167                        | 0.4    | 3.399  | 0.778   | 1.333                       | 0.512  | 3.47   | 0.555   | 0.571                      | 0.2    | 1.629   | 0.295   |
|              | left upper abdomen   | 1.518                        | 0.458  | 5.036  | 0.495   | 1.342                       | 0.441  | 4.083  | 0.604   | 1.214                      | 0.403  | 3.662   | 0.730   |
|              | middle navel         | 1.049                        | 0.326  | 3.374  | 0.936   | 1.382                       | 0.502  | 3.81   | 0.531   | 1.028                      | 0.367  | 2.882   | 0.958   |
|              | right lower abdomen  | 3.437                        | 1.188  | 9.943  | 0.023   | 0.972                       | 0.347  | 2.723  | 0.957   | 0.875                      | 0.316  | 2.426   | 0.797   |
|              | middle lower abdomen | 3.985                        | 1.277  | 12.43  | 0.017   | 0.67                        | 0.252  | 1.782  | 0.422   | 0.837                      | 0.331  | 2.118   | 0.707   |
|              | left lower abdomen   | 0.984                        | 0.328  | 2.741  | 0.921   | 0.914                       | 0.349  | 2.392  | 0.855   | 0.813                      | 0.315  | 2.097   | 0.668   |
| IBS-M        | right upper abdomen  | 1.500                        | 0.462  | 4.867  | 0.500   | 0.633                       | 0.232  | 1.731  | 0.373   | 0.657                      | 0.132  | 3.274   | 0.608   |
|              | middle upper abdomen | 1.905                        | 0.633  | 5.736  | 0.252   | 0.351                       | 0.131  | 0.936  | 0.037   | 1.964                      | 0.555  | 6.946   | 0.295   |
|              | left upper abdomen   | 1.778                        | 0.572  | 5.528  | 0.320   | 1.432                       | 0.614  | 3.337  | 0.406   | 1.500                      | 0.403  | 5.589   | 0.546   |
|              | middle navel         | 1.590                        | 0.514  | 4.921  | 0.421   | 1.535                       | 0.667  | 3.532  | 0.313   | 1.417                      | 0.381  | 5.27    | 0.603   |
|              | right lower abdomen  | 1.731                        | 0.576  | 5.202  | 0.329   | 0.619                       | 0.264  | 1.453  | 0.271   | 0.849                      | 0.231  | 3.118   | 0.805   |
|              | middle lower abdomen | 3.333                        | 1.048  | 10.601 | 0.041   | 0.589                       | 0.245  | 1.415  | 0.237   | 0.935                      | 0.254  | 3.44    | 0.92    |
|              | left lower abdomen   | 2.167                        | 0.709  | 6.621  | 0.175   | 1.118                       | 0.502  | 2.490  | 0.784   | 1.181                      | 0.334  | 4.167   | 0.796   |

Figures:

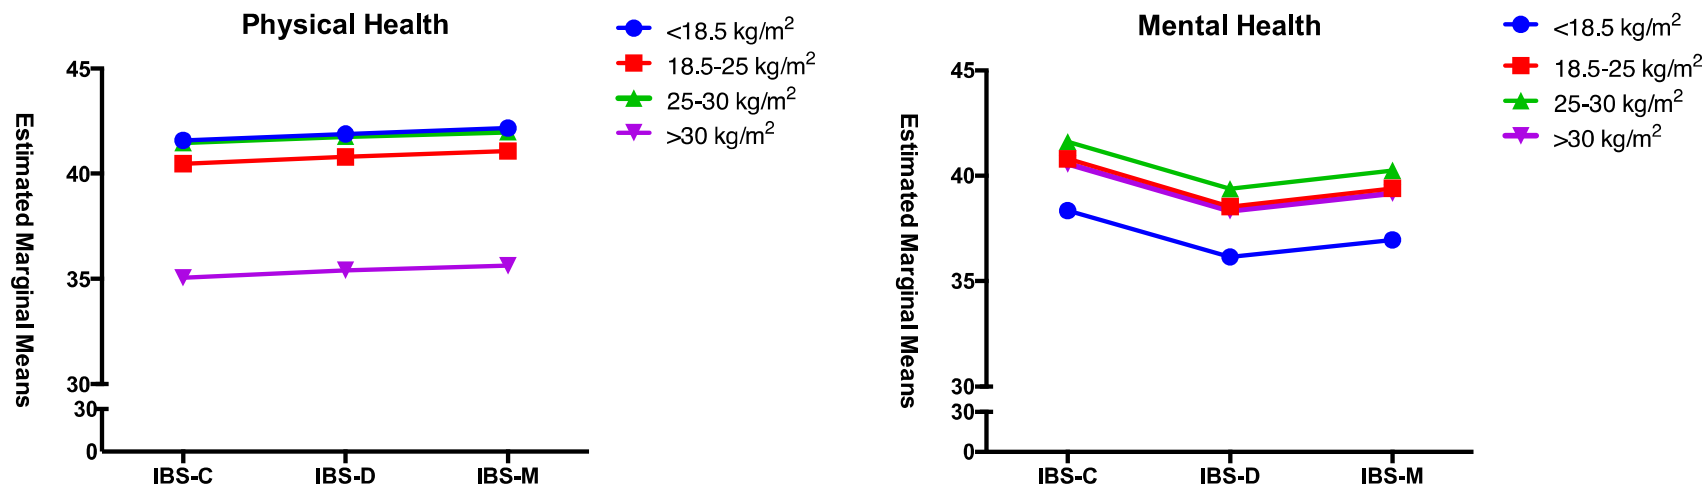

Figure 1. Estimated marginal means of physical health and mental health in each IBS subtype.

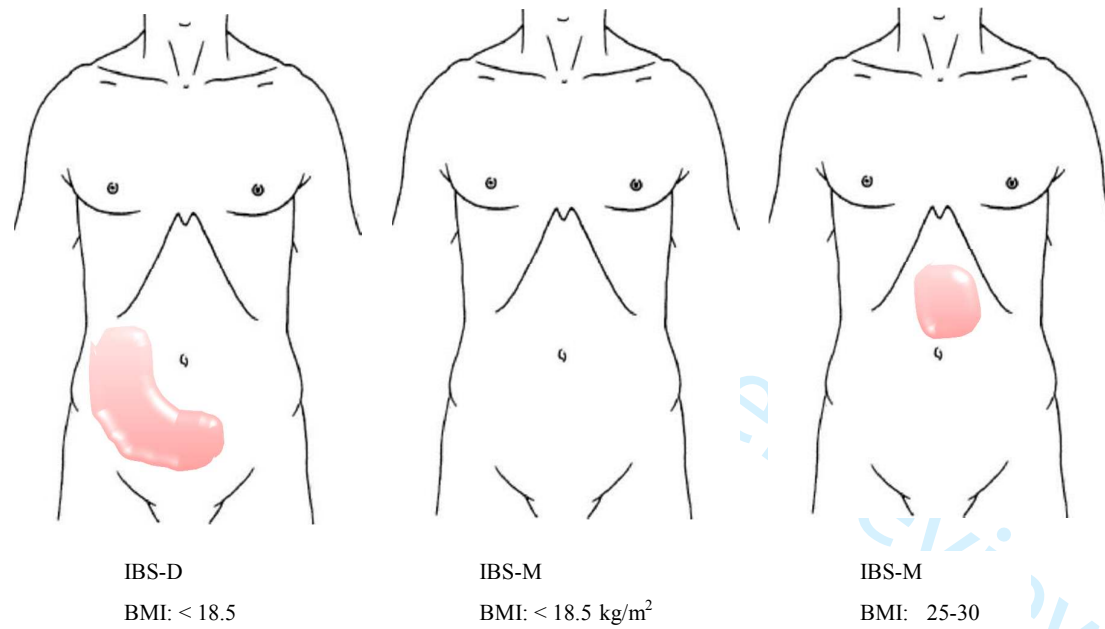

Figure 2. Significantly different pain locations in IBS subtypes separated by BMI compared with normal

STROBE Statement—Checklist of items that should be included in reports of *cross-sectional studies*

|                              | Item No | Recommendation                                                                                                                                                                                                                                                                                                                                                                                                            |
|------------------------------|---------|---------------------------------------------------------------------------------------------------------------------------------------------------------------------------------------------------------------------------------------------------------------------------------------------------------------------------------------------------------------------------------------------------------------------------|
| <b>Title and abstract</b>    | 1       | (a) Indicate the study's design with a commonly used term in the title or the abstract <b>【Page 1】</b><br>(b) Provide in the abstract an informative and balanced summary of what was done and what was found <b>【Pages 2 - 3】</b>                                                                                                                                                                                        |
| <b>Introduction</b>          |         |                                                                                                                                                                                                                                                                                                                                                                                                                           |
| Background/rationale         | 2       | Explain the scientific background and rationale for the investigation being reported <b>【Pages 4 - 5】</b>                                                                                                                                                                                                                                                                                                                 |
| Objectives                   | 3       | State specific objectives, including any prespecified hypotheses <b>【Pages 4 - 5】</b>                                                                                                                                                                                                                                                                                                                                     |
| <b>Methods</b>               |         |                                                                                                                                                                                                                                                                                                                                                                                                                           |
| Study design                 | 4       | Present key elements of study design early in the paper <b>【Pages 5 - 6】</b>                                                                                                                                                                                                                                                                                                                                              |
| Setting                      | 5       | Describe the setting, locations, and relevant dates, including periods of recruitment, exposure, follow-up, and data collection <b>【Page 6 - 7】</b>                                                                                                                                                                                                                                                                       |
| Participants                 | 6       | (a) Give the eligibility criteria, and the sources and methods of selection of participants <b>【Page 6】</b>                                                                                                                                                                                                                                                                                                               |
| Variables                    | 7       | Clearly define all outcomes, exposures, predictors, potential confounders, and effect modifiers. Give diagnostic criteria, if applicable <b>【Pages 6 - 7】</b>                                                                                                                                                                                                                                                             |
| Data sources/<br>measurement | 8*      | For each variable of interest, give sources of data and details of methods of assessment (measurement). Describe comparability of assessment methods if there is more than one group <b>【Pages 6 - 7】</b>                                                                                                                                                                                                                 |
| Bias                         | 9       | Describe any efforts to address potential sources of bias <b>【Page 6】</b>                                                                                                                                                                                                                                                                                                                                                 |
| Study size                   | 10      | Explain how the study size was arrived at <b>【Page 6】</b>                                                                                                                                                                                                                                                                                                                                                                 |
| Quantitative variables       | 11      | Explain how quantitative variables were handled in the analyses. If applicable, describe which groupings were chosen and why <b>【Pages 6 - 7】</b>                                                                                                                                                                                                                                                                         |
| Statistical methods          | 12      | (a) Describe all statistical methods, including those used to control for confounding <b>【Pages 8 - 9】</b><br>(b) Describe any methods used to examine subgroups and interactions <b>【Page 8】</b><br>(c) Explain how missing data were addressed <b>【Page 8】</b><br>(d) If applicable, describe analytical methods taking account of sampling strategy <b>【N/A】</b><br>(e) Describe any sensitivity analyses <b>【N/A】</b> |
| <b>Results</b>               |         |                                                                                                                                                                                                                                                                                                                                                                                                                           |
| Participants                 | 13*     | (a) Report numbers of individuals at each stage of study—eg numbers potentially eligible, examined for eligibility, confirmed eligible, included in the study, completing follow-up, and analysed <b>【Page 9; table 1】</b><br>(b) Give reasons for non-participation at each stage <b>【N/A】</b><br>(c) Consider use of a flow diagram <b>【Page 9】</b>                                                                     |
| Descriptive data             | 14*     | (a) Give characteristics of study participants (eg demographic, clinical, social) and information on exposures and potential confounders <b>【Pages 9 - 11】</b><br>(b) Indicate number of participants with missing data for each variable of interest <b>【Page 9; table 1】</b>                                                                                                                                            |
| Outcome data                 | 15*     | Report numbers of outcome events or summary measures <b>【Pages 9 - 11】</b>                                                                                                                                                                                                                                                                                                                                                |
| Main results                 | 16      | (a) Give unadjusted estimates and, if applicable, confounder-adjusted estimates and their precision (eg, 95% confidence interval). Make clear which confounders were adjusted for and why they were included <b>【Pages 9 - 11; table 3】</b>                                                                                                                                                                               |

|                          |    |                                                                                                                                                                                                   |
|--------------------------|----|---------------------------------------------------------------------------------------------------------------------------------------------------------------------------------------------------|
|                          |    | (b) Report category boundaries when continuous variables were categorized <b>【N/A】</b>                                                                                                            |
|                          |    | (c) If relevant, consider translating estimates of relative risk into absolute risk for a meaningful time period <b>【N/A】</b>                                                                     |
| Other analyses           | 17 | Report other analyses done—eg analyses of subgroups and interactions, and sensitivity analyses <b>【Pages 9 – 11; figures 1 -2; tables 2 - 3】</b>                                                  |
| <b>Discussion</b>        |    |                                                                                                                                                                                                   |
| Key results              | 18 | Summarise key results with reference to study objectives <b>【Page 11】</b>                                                                                                                         |
| Limitations              | 19 | Discuss limitations of the study, taking into account sources of potential bias or imprecision. Discuss both direction and magnitude of any potential bias <b>【Page 14】</b>                       |
| Interpretation           | 20 | Give a cautious overall interpretation of results considering objectives, limitations, multiplicity of analyses, results from similar studies, and other relevant evidence <b>【Pages 11 - 15】</b> |
| Generalisability         | 21 | Discuss the generalisability (external validity) of the study results <b>【Pages 12 - 15】</b>                                                                                                      |
| <b>Other information</b> |    |                                                                                                                                                                                                   |
| Funding                  | 22 | Give the source of funding and the role of the funders for the present study and, if applicable, for the original study on which the present article is based <b>【Page 1 and Page 15】</b>         |

\*Give information separately for exposed and unexposed groups.

**Note:** An Explanation and Elaboration article discusses each checklist item and gives methodological background and published examples of transparent reporting. The STROBE checklist is best used in conjunction with this article (freely available on the Web sites of PLoS Medicine at <http://www.plosmedicine.org/>, Annals of Internal Medicine at <http://www.annals.org/>, and Epidemiology at <http://www.epidem.com/>). Information on the STROBE Initiative is available at [www.strobe-statement.org](http://www.strobe-statement.org).

# BMJ Open

## Symptom severity and health-related quality of life in patients with irritable bowel syndrome: The role of body mass index

|                                 |                                                                                                                                                                                                                                                                                                                                                                                                                              |
|---------------------------------|------------------------------------------------------------------------------------------------------------------------------------------------------------------------------------------------------------------------------------------------------------------------------------------------------------------------------------------------------------------------------------------------------------------------------|
| Journal:                        | <i>BMJ Open</i>                                                                                                                                                                                                                                                                                                                                                                                                              |
| Manuscript ID                   | bmjopen-2017-019453.R1                                                                                                                                                                                                                                                                                                                                                                                                       |
| Article Type:                   | Research                                                                                                                                                                                                                                                                                                                                                                                                                     |
| Date Submitted by the Author:   | 27-Nov-2017                                                                                                                                                                                                                                                                                                                                                                                                                  |
| Complete List of Authors:       | Dong, Yuanjun; Universitätsklinikum Heidelberg Medizinische Klinik, Clinic for General Internal Medizin and Psychosomatics<br>Berens, Sabrina; Universitätsklinikum Heidelberg Medizinische Klinik<br>Eich, Wolfgang; Universitätsklinikum Heidelberg Medizinische Klinik<br>Schaefer, Rainer; University Hospital Basel, Department of Psychosomatics<br>Tesarz, Jonas; Universitätsklinikum Heidelberg Medizinische Klinik |
| <b>Primary Subject Heading</b>: | Gastroenterology and hepatology                                                                                                                                                                                                                                                                                                                                                                                              |
| Secondary Subject Heading:      | Nutrition and metabolism, Mental health                                                                                                                                                                                                                                                                                                                                                                                      |
| Keywords:                       | Irritable bowel syndrome, Abdominal pain, Obesity, Symptom score or index, Body mass index                                                                                                                                                                                                                                                                                                                                   |
|                                 |                                                                                                                                                                                                                                                                                                                                                                                                                              |

SCHOLARONE™  
Manuscripts

Only



1  
2  
3 **Original Article**  
4  
5  
6  
7

8 **Symptom severity and health-related quality of life in patients with irritable bowel**  
9 **syndrome: The role of body mass index**  
10  
11  
12  
13  
14  
15

16 Yuanjun Dong<sup>1</sup>, M.M., Sabrina Berens<sup>1</sup>, M.Sc., Wolfgang Eich<sup>1</sup>, M.D., PhD., Rainer  
17 Schaefer<sup>2</sup>, M.D., PhD., Jonas Tesarz<sup>1,\*</sup>, M.D. PhD.  
18  
19  
20  
21  
22  
23

24 <sup>1</sup> **Department of General Internal Medicine and Psychosomatics, University Hospital**  
25 **Heidelberg, Im Neuenheimer Feld 410, 69120 Heidelberg, Germany**  
26  
27  
28

29 <sup>2</sup> **Department of Psychosomatics, Division of Internal Medicine, University Hospital**  
30 **Basel, University of Basel, Hebelstrasse 2, CH-4031 Basel, Switzerland**  
31  
32  
33

34 **\* Corresponding Author.**  
35  
36

37 **FINANCIAL SUPPORT:** This research received no specific grant from any funding agency  
38 in the public, commercial or not-for-profit sectors.  
39  
40  
41

42 **DISCLOSURE STATEMENT:** The authors have indicated no financial conflicts of interest.  
43  
44

45 **Address correspondence to:** Jonas Tesarz, Department of General Internal Medicine and  
46 Psychosomatics, University Hospital Heidelberg, Im Neuenheimer Feld 410, 69120  
47 Heidelberg, Germany. Tel: 0049 /6221/56-37862, E-mail:  
48 Jonas.Tesarz@med.uni-heidelberg.de  
49  
50  
51  
52  
53  
54  
55  
56  
57  
58  
59  
60

## Abstract

### Objective

The aim of this study was to explore the association between body mass index (BMI), symptom severity and health-related quality of life (QoL) in different subtypes of patients with irritable bowel syndrome (IBS).

### Methods

A cross-sectional study was carried out in patients visiting our outpatient Functional Gastrointestinal Disorders specialty clinic. IBS diagnosis was made based on ROME III criteria. Abdominal pain and IBS symptom severity were investigated using the IBS severity score system (IBS-SSS). QoL was assessed using the Short-Form-36-Health-Survey (SF-36).

### Results

325 patients (227 females) who fulfilled ROME III criteria and provided complete BMI data ( $23.91 \pm 5.54 \text{ kg/m}^2$ ) were included. The most frequent IBS subtype was mixed IBS (IBS-M, 45.5%), followed by diarrhoea predominant IBS (IBS-D, 41.2%) and constipation predominant IBS (IBS-C, 10.8%). Overall, 54.2% of patients with IBS were in the normal weight range, 33.8% were overweight or obese, and 12.0% were underweight. The percentage of obese patients was highest in the IBS-D subgroup (20.1%,  $p < 0.01$ ). Both physical and mental health decreased significantly with the severity of symptom (all  $p < 0.01$ ). However, the relationship between symptom severity and mental health was affected by age, family status, IBS subtypes and BMI. The significantly negative dose response between symptom severity and physical health in each BMI group was found ( $p < 0.05$  or  $p < 0.01$ ). There were

1  
2  
3 no significant correlations between symptom severity and mental health in the <18.5, 25-30  
4  
5  
6 and > 30 BMI groups (all  $p > 0.05$ ).  
7

## 8 **Conclusion**

9  
10  
11 Being overweight is a phenomenon in patients with IBS regardless of IBS subtype. The  
12  
13 association between physical health and symptom severity followed a dose response pattern.  
14  
15 The relationship between mental health and symptom severity seems to be affected by age,  
16  
17 family status, IBS subtypes and BMI.  
18  
19  
20  
21  
22  
23

## 24 **Keywords:**

25  
26 Irritable bowel syndrome; Abdominal pain; Obesity; Symptom score or index  
27  
28  
29  
30  
31  
32  
33  
34  
35  
36  
37  
38  
39  
40  
41  
42  
43  
44  
45  
46  
47  
48  
49  
50  
51  
52  
53  
54  
55  
56  
57  
58  
59  
60

1  
2  
3  
4 **Strengths and limitations of this study:**  
5

6 **Strengths:** 1) Using a large patient cohort with a validated diagnosis of IBS based on the  
7

8 Rome III criteria;  
9

10  
11 2) Compared with physical health, mental health was more susceptible to age, family status,  
12

13 IBS subtypes and BMI;  
14

15  
16 3) Mental health was consistently poor in non-normal BMI groups, regardless of the  
17  
18 respective symptom severity.  
19

20  
21 **Limitations:** 1) The study was cross-sectional, therefore it is not possible to infer causation;  
22

23  
24 2) BMI assessment was based on patient self-reported and computed without objective  
25  
26 measurement;  
27

28  
29 3) BMI cannot fully reflect the impact of the factors of fatty mass, dietary habit, other lifestyle  
30  
31 factors such as physical exercise on IBS.  
32  
33  
34  
35  
36  
37  
38  
39  
40  
41  
42  
43  
44  
45  
46  
47  
48  
49  
50  
51  
52  
53  
54  
55  
56  
57  
58  
59  
60

## 1 Introduction

Irritable bowel syndrome (IBS) is a chronic and common functional bowel disorder that is characterized by recurrent abdominal pain or discomfort associated with altered bowel habits [1]. According to the Rome criteria, IBS is classified into four subtypes [IBS with diarrhoea (IBS-D), IBS with constipation (IBS-C), mixed IBS (IBS-M) and un-subtyped IBS (IBS-U)] based on the predominant abdominal symptomatology [1]. The distribution of IBS subtypes differs in different studies and depends on the population investigated, geographic location and definitions used for subtype classification [2, 3]. The symptom severities of IBS are associated with different eating habits [4, 5] and IBS symptoms that have far-reaching consequences on patients' nutritional status as well as on their quality of life [6]. This has far-reaching consequences on patients' nutritional status and on their quality of life (QoL).

It has been frequently reported that IBS leads to impaired QoL [7-9]. However, nutritional status may also independently modulate IBS symptoms and patients' quality of life. So far, however, very little attention has been paid to the role of nutritional status on health-related quality of life and symptom severity in patients with IBS.

Epidemiologic studies have shown that as many as 16.5% of adults in European countries are obese [body mass index (BMI) > 30 kg/m<sup>2</sup>] [10] and that the incidence of obesity is increasing [11]. Additionally, a cross-sectional multicentre study found that more than 63% of outpatients and 80% of inpatients in gastroenterological centres suffered from significant changes in body composition [12]. And also the other way round: Underweight (BMI < 18.5 kg/m<sup>2</sup>) or obese body condition (BMI > 30 kg/m<sup>2</sup>) are both associated with

1  
2  
3 multiple abdominal symptoms leading to reduced QoL [13, 14]. However, although extensive  
4  
5  
6 research has been carried out on the prevalence of obesity in the general population and in  
7  
8  
9 connection with numerous diseases, there is only little published data on the prevalence and  
10  
11  
12 clinical relevance of nutritional status in patients with IBS. Locke *et al.* [15] found no  
13  
14  
15 association between IBS status and BMI. Although extensive research has been carried out on  
16  
17  
18 the prevalence of obesity in the general population and in connection with numerous diseases,  
19  
20  
21 data on the prevalence and clinical relevance of nutritional status in patients with IBS are  
22  
23  
24 sparse. Studies with a large enough sample size and specifying between the different IBS  
25  
26  
27 subtypes are missing so far. In particular, little is known about the influence of BMI on  
28  
29  
30 quality of life in patients with IBS.

31  
32  
33 Taken together, IBS is a heterogeneous disease and can be differentiated into different  
34  
35  
36 IBS subtypes because of the different expected aetiologies, severity levels and levels of  
37  
38  
39 impairment [16]. Therefore, the aim of this study is to determine the effect of BMI on IBS  
40  
41  
42 symptom severity and quality of life for each subtype of IBS based on the Rome III criteria.  
43  
44  
45

## 46 47 48 49 50 51 52 53 54 55 56 57 58 59 60

## 2 Methods

This cross-sectional survey included patients evaluated at the Functional Gastrointestinal Disorders (FGIDs) specialty clinic of the Department of General Internal Medicine and Psychosomatics of Heidelberg University Hospital, which is a tertiary care facility. All patients who completed our routine baseline documentation were enrolled. The routine data

1  
2  
3 from individual health records was transferred into the database and pseudonymized. This  
4  
5  
6 study was approved by the Ethics Committee of Heidelberg University (S-041/2014) and  
7  
8 carried out in accordance with the Declaration of Helsinki.  
9

## 10 11 12 13 **2.1 Patients recruitment**

14  
15  
16 From 01/2011 to 12/2016, patients' clinical data were consecutively collected from our  
17  
18 outpatient FGIDs clinic at Heidelberg University Hospital for this explorative and descriptive  
19  
20 study. All patients  $\geq 18$  years of age were included, if they fulfilled the Rome III criteria for  
21  
22 the diagnosis of IBS [1]. The subtype criteria for IBS were based on stool consistency as  
23  
24 assessed by the Bristol Stool Scale (BSS) and Rome III criteria [17]. Demographic data  
25  
26 including gender, age, family status, level of education and residence, was also collected at  
27  
28 baseline using the Psychosomatic Basis Documentation Questionnaire (Psy-BaDo) [18].  
29  
30  
31  
32  
33  
34  
35  
36

## 37 **2.2 Measurement of IBS symptom severity and pain**

38  
39 Patients rated the severity of their IBS symptoms by completing the IBS severity score  
40  
41 system (IBS-SSS) [19]. The IBS-SSS has a maximum score of 500 and comprises five items:  
42  
43 frequency and intensity of abdominal pain, severity of abdominal distension, dissatisfaction  
44  
45 with bowel habits, and interference of IBS with daily life. Based on validated cut-off values,  
46  
47 three IBS severity subgroups can be distinguished: Mild (IBS-SSS: 75-175), Moderate  
48  
49 (IBS-SSS: 175-300) and Severe (IBS-SSS: > 300). The German version of this questionnaire  
50  
51  
52  
53  
54  
55  
56  
57  
58  
59  
60

1  
2  
3 was validated by Betz et al. [20] and the total score was computed in accordance with the  
4  
5  
6 manual.  
7  
8  
9

### 10 11 **2.3 Measurement of BMI**

12  
13 In the context of self-reporting, BMI was calculated as the individual's body weight (kg)  
14  
15 divided by the square of their height (m). BMI was categorized according to the World Health  
16  
17 Organization (WHO) classification of physical status [21]: underweight (BMI < 18.5 kg/m<sup>2</sup>),  
18  
19 normal weight (BMI 18.5–25 kg/m<sup>2</sup>), overweight (25–30 kg/m<sup>2</sup>), or obese (BMI > 30 kg/m<sup>2</sup>).  
20  
21  
22  
23  
24  
25

### 26 27 **2.4 Measurement of quality of life**

28  
29 Quality of life was measured using the Short Form 36 Health Survey (SF-36) [22]. SF-36  
30  
31 is a 36-item, patient-reported survey of patient health-related quality of life, which consists of  
32  
33 a physical health index and mental health index. Each scale is directly transformed into a  
34  
35 0-100 scale. Lower scores represent a higher degree of disability. The SF-36 is widely used  
36  
37 and well validated for assessing generic health outcomes. Validation of the German version  
38  
39 was performed by Morfeld *et al.* [23].  
40  
41  
42  
43  
44  
45  
46

### 47 48 **2.5 Statistical analysis**

49  
50 Routine data were transformed into an SPSS file and evaluated using the statistical  
51  
52 program SPSS (IBM, version 22.0). Descriptive statistics are presented as the means and  
53  
54 standard deviation (*SD*) for continuous variables and as absolute numbers and percentages for  
55  
56  
57  
58  
59  
60



1  
2  
3 categorical variables. All analyses were explorative and not of a confirmatory nature. All  
4  
5 primary and secondary variables were first tested for normal distribution. For normally  
6  
7 distributed variables, the mean and standard deviation were calculated. Variables that lacked a  
8  
9 normal distribution were reported using the median and interquartile range. The  
10  
11 Mann-Whitney U Test was used to assess the level of significance because a number of  
12  
13 participants differed between the groups. Comparison of socio-demographical and  
14  
15 anthropometric data according to BMI was performed using analysis of variance (ANOVA)  
16  
17 and nonparametric tests in the first instance. Where significant group differences were detected  
18  
19 based on ANOVA, post-hoc least significant difference tests were conducted to compare the  
20  
21 study groups in a pairwise fashion. Associations with BMI were investigated using the WHO  
22  
23 categories (normal weight as the reference group) and the continuous BMI variable. We also  
24  
25 used the Pearson and Spearman correlation coefficients to investigate the linear association  
26  
27 between demographics, clinical and psychological features. Hierarchical multiple regression  
28  
29 analysis was used to help understand the impact of potential confounders. All tests were  
30  
31 two-sided and statistical significance was accepted if  $p < 0.05$ .  
32  
33  
34  
35  
36  
37  
38  
39  
40  
41  
42  
43  
44  
45  
46

### 47 **3 Results**

#### 48 **3.1 Characteristics of study sample**

49  
50 A total of 576 patients completed the questionnaire. Excluding 113 patients whose Rome  
51  
52 III criteria data were partly missing and 38 patients whose BMI data were missing, eventually  
53  
54  
55  
56  
57  
58  
59  
60

1  
2  
3 325 patients with IBS were enrolled in this study (98 males, 227 females; mean BMI  $23.91 \pm$   
4  $5.54 \text{ kg/m}^2$ ). The demographic and baseline characteristics of the patients with IBS among the  
5  
6 different subtypes are summarized in Table 1. Of the included subjects, the most frequent IBS  
7  
8 subtype was IBS-M (45.5%), followed by IBS-D (41.2%), and IBS-C (10.8%). Only 54.2%  
9  
10 of patients with IBS were within the normal weight range, whereas 33.8% were overweight or  
11  
12 obese, and only a minority were underweight (12.0%). Taking gender into account, 6.1% of  
13  
14 males and 14.5% of females were underweight. Additionally, 8.2% of males and 14.5% of  
15  
16 females were obese and 29.6% of males and 17.6% of females were overweight. Interestingly,  
17  
18 this distribution pattern was similar between the different IBS groups. In particular, there was  
19  
20 no difference between the IBS-C and IBS-M groups. In the IBS-D group the percentage of  
21  
22 obese patients reached 20.1%. There were no significant differences between the BMI groups  
23  
24 with regard to symptom severity or mental health, but the groups were significantly different  
25  
26 with regard to physical health.  
27  
28  
29  
30  
31  
32  
33  
34  
35  
36  
37  
38

### 39 **3.2 BMI and health-related quality of life in IBS subtypes**

40  
41 Two-way ANOVA analysis between subjects was conducted to compare the effect of  
42  
43 BMI level on physical health in underweight, normal weight, overweight and obese  
44  
45 conditions in each IBS subtype. There was a significant effect of BMI ( $F = 4.38, p < 0.01$ ).  
46  
47 However, there was no significant effect of IBS subtype ( $F = 0.06, p = 0.945$ ). Post-hoc  
48  
49 comparisons using the LSD test indicated that the mean score for obese patients ( $M = 35.08,$   
50  
51  $SD = 10.02$ ) was significantly different from patient with other BMIs ( $p < 0.01$ ) with regard to  
52  
53  
54  
55  
56  
57  
58  
59  
60

1  
2  
3 physical health. However, the underweight patients ( $M = 41.97$ ,  $SD = 9.02$ ) did not  
4 significantly differ from the normal weight ( $M = 40.97$ ,  $SD = 8.86$ ) or overweight ( $M = 42.05$ ,  
5  
6  $SD = 9.17$ ) patients with regard physical health. As seen in Figure 1, obese patients with IBS  
7  
8 had worse physical health than patients with other BMIs ( $p < 0.05$ ). With regard to mental  
9  
10 health, there was no significant relationship.  
11  
12  
13  
14  
15

### 16 17 18 19 **3.3 Correlations between demographics, clinical and psychological features**

20  
21 Pearson product-moment correlations (Table 2) indicated that BMI was negatively  
22 correlated with physical health (SF-36) ( $r = -0.198$ ,  $p < 0.01$ ). Education was positively  
23 correlated with physical health (SF-36) ( $r = 0.204$ ,  $p < 0.01$ ). Additionally, symptom severity  
24 correlated with physical health (SF-36) ( $r = 0.204$ ,  $p < 0.01$ ). Additionally, symptom severity  
25 (IBS-SSS) was negatively correlated with physical health ( $r = -0.394$ ,  $p < 0.01$ ) and mental  
26 health ( $r = -0.303$ ,  $p < 0.01$ ).  
27  
28  
29  
30  
31  
32  
33

### 34 35 36 37 **3.4 Hierarchical multiple regression analysis of physical and mental health across** 38 39 **categories of symptom severity**

40  
41 We divided the severity of symptom into three groups (mild, moderate and severe). As  
42 shown in Table 3 and Table 4, significantly positive correlations between symptom severity  
43 and physical and mental health (all  $p < 0.01$ ) were found. Hierarchical multiple regression  
44 analysis was used to stratify gender, age, family status, education status, IBS subtypes, and  
45 BMI. We found that as the symptom severity increased, physical health was observed in each  
46 hierarchy to be significantly different (all  $p < 0.05$ ). However, mental health only had  
47  
48  
49  
50  
51  
52  
53  
54  
55  
56  
57  
58  
59  
60

1  
2  
3 significant difference in the analysis by gender and education status (both  $p < 0.05$ ). There  
4  
5  
6 were no significant differences of mental health in the hierarchical multiple regression  
7  
8 analysis by age, family status, IBS subtypes and BMI.  
9

### 10 11 12 13 **3.5 The influence of symptom severity on physical and mental health in each BMI group**

14  
15  
16 As shown in Table 1, the physical health of IBS patients in different BMI groups had  
17  
18 significant difference ( $p = 0.001$ ). However, there was no significant difference in mental  
19  
20 health ( $p = 0.613$ ). As shown in Figure 2, the significantly negative dose response between  
21  
22 symptom severity and physical health in each BMI group was found ( $p < 0.05$  or  $p < 0.01$ ).  
23  
24 The influence of symptom severity on mental health had significant difference ( $p < 0.01$ ) only  
25  
26 within the normal BMI group (BMI 18.5-25). In the other three BMI groups (BMI <18.5,  
27  
28 25-30 and > 30), there were no significant correlations between symptom severity and mental  
29  
30 health.  
31  
32  
33  
34  
35  
36  
37  
38  
39  
40  
41

## 42 **4 Discussion**

43  
44 The aim of this study was to determine the effect of BMI on the relationship between  
45  
46 symptom severity and quality of life for IBS based on the Rome III criteria. For this purpose,  
47  
48 we used standardized questionnaires and medical records to confirm the diagnosis and to  
49  
50 assess patient symptoms and quality of life.  
51  
52  
53  
54  
55  
56  
57  
58  
59  
60

1  
2  
3  
4 Our data show that being overweight is a common phenomenon in patients with IBS  
5  
6 regardless of IBS subtype. These findings are in agreement with the results of a previous  
7  
8 study based on obese patients in France, which found that 30.0% of obese patients had IBS  
9  
10 [24]. We found that 54.2% of patients with IBS were in the normal weight range, which is  
11  
12 consistent with previous results [25]. What is worth noting is that, the overweight and obesity  
13  
14 rates in the general adult population in Germany [10] are higher than those found in our IBS  
15  
16 cohort. According to the German Health Update (GEDA) [10], in 2012 the overweight rate of  
17  
18 adults was 36.2% and the obese rate was 16.5%. The causal relationship between IBS and  
19  
20 abnormal body weight are hard to elucidate. However, abnormal body weight has an  
21  
22 undeniable influence in both patients with IBS and in the general population. Interestingly,  
23  
24 the distribution of weight was similar between the different IBS groups. In particular, there  
25  
26 was no difference between the IBS-C and IBS-M groups. Notably, in the IBS-D group the  
27  
28 percentage of obese patients reached 20.1%. Lee et al. [26] evaluated the relationship between  
29  
30 visceral adipose tissue and the risk of IBS and suggested that disturbances of visceral fat may  
31  
32 be more common in IBS-D patients. In addition, another Korean study found increased  
33  
34 intestinal permeability in IBS-D patients [27]. One possible explanation is that the increase in  
35  
36 visceral fat leads to an increase in intestinal osmolality [28] and then leads to the chronic  
37  
38 diarrhea. These studies, however, were confined to patients from South Korea. Therefore,  
39  
40 further research is needed to these findings.  
41  
42  
43  
44  
45  
46  
47  
48  
49  
50

51  
52 Our data show an association between symptom severity and QoL with regard to  
53  
54 physical and mental health. By the hierarchical multiple regression analysis, we found that in  
55  
56  
57  
58  
59  
60

1  
2  
3 each hierarchy (gender, age, family status, education status, IBS subtypes and BMI), the  
4  
5  
6 significantly negative correlations between symptom severity and physical health were found.  
7  
8  
9 However, significant difference only existed by the hierarchy of gender and education status  
10  
11 in mental health. The relationship between physical health and symptom severity was not  
12  
13 affected by the confounders above. What's more, the relationship between mental health and  
14  
15 symptom severity seems to be more likely affected by age, family status, IBS subtypes and  
16  
17 BMI. This finding is in agreement with a study by Mykletun [29], which suggested that BMI  
18  
19 had significant association with IBS with regard to anxiety and mood disorders. However,  
20  
21 their study evaluated only female patients.  
22  
23  
24  
25

26  
27       Though there was no significant difference in symptom severity between the different  
28  
29 BMI groups, these groups differed significantly with regard to QoL. Whereas our data suggest  
30  
31 that there is a kind of dose response relationship of symptom severity with physical health in  
32  
33 all BMI groups and with mental health in the normal BMI group. In non-normal BMI groups  
34  
35 (BMI <18.5, 25-30 and > 30), the impact of the symptom severity on mental health was not  
36  
37 significantly different, i.e. mental health was always poor in non-normal BMI groups,  
38  
39 regardless of the severity of the symptom. IBS has a significant impact on patients' QoL [30].  
40  
41  
42 We partly agree with the study of Amouretti et al. [31], which found that the IBS patients who  
43  
44 reported their symptoms as severe or very severe had a very poor QoL compared with those  
45  
46 who reported their symptoms as moderate. Their study did not distinguish between physical  
47  
48 and mental health and did not consider the effects of confounding factors such as BMI. This is  
49  
50  
51  
52  
53  
54  
55  
56  
57  
58  
59  
60

1  
2  
3 an interesting but not completely new result which gives rise to the question of what  
4  
5 mechanisms are responsible for this association.  
6  
7

8 Our results suggest that higher BMI adversely affects patients' physical health in IBS.  
9  
10 The obese groups were characterized by reduced physical quality of life. This is in line with  
11  
12 previous studies [14], in that increasing BMI is associated with increased upper  
13  
14 gastrointestinal symptoms, bloating, and diarrhoea. Obesity may lead to more physiological  
15  
16 stress on organs. Richards et al. [32] reported that obese patients have more severe pain and  
17  
18 are to a larger extent restricted in their daily functioning compared to patients of normal  
19  
20 weight. An additional finding of our study was that a low level of BMI (BMI < 18.5) also had  
21  
22 negative effect on the QoL in patients with IBS indicating an U-shaped relationship between  
23  
24 BMI and quality of life. This might suggest that differences in symptom severity affect the  
25  
26 quality of life of patients with IBS less than differences in BMI [33, 34].  
27  
28  
29  
30  
31  
32  
33

34 Several limitations of this study must be taken into account. Firstly, the study was  
35  
36 cross-sectional, therefore, it is impossible to infer causation. Secondly, BMI was based on the  
37  
38 self-reported height and weight of patients and computed without objective measurement,  
39  
40 therefore bias may have been introduced. Patients may occasionally underreport or overreport  
41  
42 their weight and height leading to an underestimation of underweight or obese patients.  
43  
44 However, in the Nutrinet-Santé study, researchers reported that deviations in self-reported  
45  
46 BMIs from questionnaires can be ignored because their results confirmed the validity and  
47  
48 agreement of self-reported data with measured data [35, 36]. The choice of SF-36 as the only  
49  
50 QoL tool may partly miss the relationship between symptom severity and QoL. Moreover,  
51  
52  
53  
54  
55  
56  
57  
58  
59  
60

1  
2  
3 BMI is associated with a multitude of different factors, such as genetics, fatty mass, dietary  
4 habit or physical exercise. Thus, BMI cannot fully reflect the impact of those factors on IBS  
5  
6 in more details and more research is needed. The strengths of this study, however are the use  
7  
8 of a large patient cohort with a validated diagnosis of IBS based on the Rome III criteria.  
9  
10

11  
12  
13 To conclude, being overweight is a common phenomenon in IBS patients regardless of  
14  
15 IBS subtypes. Our data further suggest that overweight and obesity may have a relevant  
16  
17 influence on quality of life. The findings of this study have some implications for future  
18  
19 practice. If there is a crucial relationship between physical health and BMI in IBS patients,  
20  
21 clinical doctors should pay special attention to abnormal weight in IBS patients as this may be  
22  
23 an indicator of a poorer quality of life, especially with regard to the physical health.  
24  
25  
26  
27  
28  
29  
30  
31  
32  
33

34 **Declaration of personal and funding interests:** This research received no specific grant  
35  
36 from any funding agency in the public, commercial or not-for-profit sectors.  
37  
38  
39  
40  
41  
42  
43

44 **Conflict of interest:**

45  
46 The authors have indicated no financial conflicts of interest.

47  
48  
49 Yuanjun Dong, Jonas Tesarz, Rainer Schaefer and Wolfgang Eich designed the study and  
50  
51 wrote the protocol.  
52  
53  
54  
55  
56  
57  
58  
59  
60



1  
2  
3 Yuanjun Dong, Sabrina Berens and Jonas Tesarz performed the literature searches and  
4  
5  
6 analyses.

7  
8 Yuanjun Dong wrote the first draft of the manuscript.

9  
10  
11 All of the authors contributed to and have approved the final manuscript.  
12  
13  
14  
15  
16  
17  
18

19 **Data sharing statements:** No additional data are available.  
20  
21  
22  
23  
24  
25

## 26 **References:**

27  
28  
29 [1] Drossman DA. The functional gastrointestinal disorders and the Rome III process.  
30  
31 *Gastroenterology* 2006;130:1377-1390.  
32

33  
34 [2] Kibune-Nagasako C, García-Montes C, Silva-Lorena SL, et al. Irritable bowel syndrome  
35  
36 subtypes: clinical and psychological features, body mass index and comorbidities. *Revista*  
37  
38 *Española de Enfermedades Digestivas* 2016;108:59-64.  
39

40  
41 [3] Le Pluart D, Sabaté JM, Bouchoucha M, et al. Functional gastrointestinal disorders in 35  
42  
43 447 adults and their association with body mass index. *Alimentary Pharmacology and*  
44  
45 *Therapeutics* 2015;41:758-767.  
46  
47

48  
49 [4] Eswaran S, Chey WD, Jackson K, et al. A Diet Low in Fermentable Oligo-, Di-, and  
50  
51 Monosaccharides and Polyols Improves Quality of Life and Reduces Activity Impairment in  
52  
53  
54  
55  
56  
57  
58  
59  
60

1  
2  
3 Patients With Irritable Bowel Syndrome and Diarrhea. *Clinical Gastroenterology and*  
4  
5  
6 *Hepatology* 2017; 15:1817-1819.

7  
8 [5] Spencer M, Chey WD, Eswaran S. Dietary renaissance in IBS: has food replaced  
9  
10 medications as a primary treatment strategy?. *Current treatment options in gastroenterology*  
11  
12 2014; 12: 424-440.

13  
14  
15  
16 [6] Kubo M, Fujiwara Y, Shiba M, et al. Differences between risk factors among irritable  
17  
18 bowel syndrome subtypes in Japanese adults. *Neurogastroenterology and Motility* 2011;23:  
19  
20 249-254.

21  
22  
23 [7] Lacy, Brian E. Perspective: An easier diagnosis. *Nature* 2016;533.7603: S107-S107.

24  
25  
26 [8] Ljótsson B, Hesser H, Andersson E, et al. Provoking symptoms to relieve symptoms: a  
27  
28 randomized controlled dismantling study of exposure therapy in irritable bowel syndrome.  
29  
30  
31 *Behaviour Research and Therapy* 2014;55:27-39.

32  
33  
34 [9] Hoekman, Daniël R, et al. Annual Costs of Care for Pediatric Irritable Bowel Syndrome,  
35  
36 Functional Abdominal Pain, and Functional Abdominal Pain Syndrome. *The Journal of*  
37  
38 *Pediatrics* 2015;167.5:1103-1108.

39  
40  
41 [10] Lange C, Jentsch F, Allen J, et al. Data Resource Profile: German Health Update  
42  
43 (GEDA)—the health interview survey for adults in Germany. *International journal of*  
44  
45 *epidemiology* 2015; 44: 442-450.

46  
47  
48 [11] Gracey M, King M. Indigenous health part 1: determinants and disease patterns. *The*  
49  
50  
51 *Lancet* 2009;374:65-75.

1  
2  
3 [12] Rizzi M, Mazzuoli S, Regano N, et al. Undernutrition, risk of malnutrition and obesity in  
4 gastroenterological patients: A multicenter study. *World journal of gastrointestinal oncology*  
5  
6 2016; 8: 563.  
7  
8

9  
10 [13] van Oijen MG, Josemanders DF, Laheij RJ, van Rossum LG, Tan AC, Jansen JB.  
11 Gastrointestinal disorders and symptoms: does body mass index matter? *The Netherlands*  
12  
13 *Journal of Medicine* 2006;64:45–49.  
14  
15

16 [14] Talley NJ, Howell S, Poulton R. Obesity and chronic gastrointestinal tract symptoms in  
17  
18 young adults: a birth cohort study. *The American Journal of Gastroenterology* 2004;99:1807–  
19  
20 1814.  
21  
22

23 [15] Locke GR, Zinsmeister AR, Schleck CD, et al. Psychosocial distress and somatic  
24  
25 symptoms in community subjects with irritable bowel syndrome: a psychological component is  
26  
27 the rule. *The American Journal of Gastroenterology* 2009;104:1772-1779.  
28  
29

30 [16] Spiegel B, Bolus R, Harris LA, et al. Measuring irritable bowel syndrome patient-reported  
31  
32 outcomes with an abdominal pain numeric rating scale. *Alimentary pharmacology and*  
33  
34 *therapeutics* 2009; 30: 1159-1170.  
35  
36

37 [17] Heaton KW, Gosh S. Relation between stool form on a seven point scale and symptoms of  
38  
39 urgency, straining, and incomplete evacuation. *Gut* 1989;30:A1465-A1465.  
40  
41

42 [18] Heuft G. Praxis der Qualitätssicherung in der Psychotherapie: das Manual zur  
43  
44 Psy-BaDo;[entsprechend den Empfehlungen der psychotherapeutischen Fachgesellschaften].  
45  
46  
47  
48  
49  
50  
51  
52 *Thieme* 1998.  
53  
54  
55  
56  
57  
58  
59  
60

- 1  
2  
3 [19] Kaptchuk TJ, Friedlander E, Kelley JM, et al. Placebos without deception: a randomized  
4 controlled trial in irritable bowel syndrome. *PloS One* 2010;5: e15591.  
5  
6  
7  
8 [20] Betz C, Mannsdörfer K, Bischoff SC. Validation of the IBS-SSS. *Zeitschrift für*  
9  
10  
11  
12  
13  
14 [21] World Health Organization. Physical status: The use of and interpretation of  
15  
16 anthropometry, Report of a WHO Expert Committee 1995.  
17  
18  
19 [22] Jenkinson C, Coulter A, Wright L. Short form 36 (SF36) health survey questionnaire:  
20  
21 normative data for adults of working age. *BMJ* 1993;306:1437-1440.  
22  
23  
24 [23] Morfeld M, Kirchberger I, Bullinger M. SF-36 Fragebogen zum Gesundheitszustand:  
25  
26 Deutsche Version des Short Form-36 Health Survey. *Hogrefe* 2011.  
27  
28  
29 [24] Schneck AS, Anty R, Tran A, et al. Increased Prevalence of Irritable Bowel Syndrome in a  
30  
31 Cohort of French Morbidly Obese Patients Candidate for Bariatric Surgery. *Obesity surgery*  
32  
33 2016; 26: 1525-1530.  
34  
35  
36 [25] Rodríguez LA. One-year follow-up of newly diagnosed irritable bowel syndrome patients  
37  
38  
39  
40  
41  
42 [26] Lee CG, Lee JK, Kang YS, et al. Visceral abdominal obesity is associated with an  
43  
44 increased risk of irritable bowel syndrome. *The American journal of gastroenterology*  
45  
46 2015;110:310-319.  
47  
48  
49 [27] Lee H, Park JH, Park DI et al. Mucosal mast cell count is associated with intestinal  
50  
51 permeability in patients with diarrhea predominant irritable bowel syndrome. *Journal of*  
52  
53  
54  
55  
56  
57  
58  
59  
60

1  
2  
3 [28] Eslick GD. Gastrointestinal symptoms and obesity: a meta-analysis. *Obesity Reviews*  
4 2012;13:469-479.  
5  
6

7  
8 [29] Mykletun A, Jacka F, Williams L, et al. Prevalence of mood and anxiety disorder in  
9 self-reported irritable bowel syndrome (IBS). An epidemiological population based study of  
10 women. *BMC Gastroenterology* 2010; 10: 88.  
11  
12  
13

14  
15 [30] Neri L, Iovino P. Bloating is associated with worse quality of life, treatment satisfaction,  
16 and treatment responsiveness among patients with constipation-predominant irritable bowel  
17 syndrome and functional constipation. *Neurogastroenterology and Motility* 2016;28: 581-591.  
18  
19  
20  
21

22 [31] Amouretti M, Le Pen C, Gaudin AF, et al. Impact of irritable bowel syndrome (IBS) on  
23 health-related quality of life (HRQOL). *Gastroenterologie clinique et biologique* 2006;30:  
24 241-246.  
25  
26  
27  
28

29 [32] Richards MM, D Adams TED, Hunt SC. Functional status and emotional well-being,  
30 dietary intake, and physical activity of severely obese subjects. *Journal of the American dietetic*  
31 *association* 2000;100:67-75.  
32  
33  
34  
35

36 [33] Canavan C, West J, Card T. Review article: the economic impact of the irritable bowel  
37 syndrome. *Alimentary Pharmacology and Therapeutics* 2014;40:1023-1034.  
38  
39  
40  
41

42 [34] Zhou QQ, Verne GN. New insights into visceral hypersensitivity—clinical implications in  
43 IBS. *Nature Reviews Gastroenterology and Hepatology* 2011;8:349-355.  
44  
45  
46  
47

48 [35] Lassale C, Péneau S, Touvier M, et al. Validity of web-based self-reported weight and  
49 height: results of the Nutrinet-Santé study. *Journal of Medical Internet Research* 2013;15:e152.  
50  
51  
52  
53

[36] Siah KTH, Wong RK, Chan YH, et al. Prevalence of irritable bowel syndrome in Singapore and its association with dietary, lifestyle, and environmental factors. *Journal of Neurogastroenterology and Motility* 2016;22:670-676.

## Table and Figure Legends

### Table 1. Distribution of demographic variables by BMI categories in IBS patients

a Comparison by two-tailed Fisher's exact test;

b Comparison among the four groups of BMI by one-way ANOVA.

\*  $p < 0.05$ ,

\*\*  $p < 0.05$  for post-hoc comparison between BMI<18.5, BMI 25-30 or BMI >30 and BMI 18.5-25.

#  $p < 0.05$  for post-hoc comparison between BMI<18.5 and BMI >30.

§  $p < 0.01$  for post-hoc comparison between BMI<18.5, BMI 18.5-25 or BMI 25-30 and BMI >30.

△ IBS-SSS: Mild (IBS-SSS: 75-175), Moderate (IBS-SSS: 175-300) and Severe (IBS-SSS: > 300).

† SF-36: range from 0 ("highest disability") to 100 ("no disability").

IBS-C, IBS with constipation; IBS-D, IBS with diarrhea; IBS-M, mixed IBS; BMI, body mass index;

### Table 2. Correlation Matrix for the Study Variables in IBS patients

\*  $p < 0.01$ ; BMI, Body mass index;

1  
2  
3  
4  
5  
6 **Table 3. Geometric mean values for physical health across categories of IBS-SSS level, by**  
7  
8 **gender, age, family and education status, IBS subtypes and BMI**  
9

10 \* IBS-U was not included in the analysis because the sample size is too small.

11  
12  
13 IBS-C, IBS with constipation; IBS-D, IBS with diarrhea; IBS-M, mixed IBS; BMI, body mass  
14  
15  
16 index; 95%CI, 95% confidence interval  
17

18  
19  
20  
21 **Table 4. Geometric mean values for mental health across categories of IBS-SSS level, by**  
22  
23 **gender, age, family and education status, IBS subtypes and BMI**  
24

25  
26 \* IBS-U was not included in the analysis because the sample size is too small.

27  
28  
29 IBS-C, IBS with constipation; IBS-D, IBS with diarrhea; IBS-M, mixed IBS; BMI, body mass  
30  
31  
32 index; 95%CI, 95% confidence interval  
33

34  
35  
36  
37 **Figure 1. Estimated marginal means of physical health and mental health stratified**  
38  
39 **according to IBS subtype**  
40

41 IBS: irritable bowel syndrome, IBS-C, IBS with constipation; IBS-D, IBS with diarrhea;  
42  
43  
44 IBS-M, mixed IBS  
45

46  
47  
48  
49 **Figure 2. The influence of IBS-SSS on physical health and mental health stratified**  
50  
51 **according to BMI level**  
52

53  
54 \*  $p < 0.05$ ; #  $p < 0.01$ ;  
55  
56  
57

1  
2  
3 BMI, body mass index;  
4

5  
6 IBS symptom severity (IBS-SSS) subgroups: Mild (IBS-SSS: 75-175), Moderate (IBS-SSS:  
7  
8 175-300) and Severe (IBS-SSS: > 300).  
9

10  
11  
12  
13  
14  
15  
16  
17  
18  
19  
20  
21  
22  
23  
24  
25  
26  
27  
28  
29  
30  
31  
32  
33  
34  
35  
36  
37  
38  
39  
40  
41  
42  
43  
44  
45  
46  
47  
48  
49  
50  
51  
52  
53  
54  
55  
56  
57  
58  
59  
60

For peer review only



Table 1. Distribution of demographic variables by BMI categories in IBS patients

|                                   | BMI   |                              |                    |                      |                    |                           |                    |                    |                    |                        |                    |                             |
|-----------------------------------|-------|------------------------------|--------------------|----------------------|--------------------|---------------------------|--------------------|--------------------|--------------------|------------------------|--------------------|-----------------------------|
|                                   | Total | < 18.5 kg/m <sup>2</sup>     |                    |                      |                    | 18.5-25 kg/m <sup>2</sup> |                    |                    |                    | > 30 kg/m <sup>2</sup> |                    | <i>p</i> value <sup>a</sup> |
|                                   |       | Effective N (%) or Mean [SD] | N (%) or Mean [SD] | N (%) or Mean [SD]   | N (%) or Mean [SD] | N (%) or Mean [SD]        | N (%) or Mean [SD] | N (%) or Mean [SD] | N (%) or Mean [SD] | N (%) or Mean [SD]     |                    |                             |
| N                                 | 325   | (100.0)                      | 39                 | (12.0)**             | 176                | (54.2)                    | 69                 | (21.2)**           | 41                 | (12.6)**               | < 0.01             |                             |
| Gender                            |       |                              |                    |                      |                    |                           |                    |                    |                    |                        |                    |                             |
| Male                              | 98    | (30.2)                       | 6                  | (6.1)                | 55                 | (56.1)                    | 29                 | (29.6)             | 8                  | (8.2)                  | 0.012              |                             |
| Female                            | 227   | (69.8)                       | 33                 | (14.5)               | 121                | (53.3)                    | 40                 | (17.6)             | 33                 | (14.5)                 |                    |                             |
| Age                               | 38.87 | [15.68]                      | 34.92              | [15.57] <sup>#</sup> | 37.25              | [15.41]                   | 43.55              | [15.67]**          | 41.88              | [15.15]                | 0.007 <sup>b</sup> |                             |
| Family status                     |       |                              |                    |                      |                    |                           |                    |                    |                    |                        |                    |                             |
| Single                            | 149   | (46.3)                       | 23                 | (15.4)               | 89                 | (59.7)                    | 27                 | (18.1)             | 10                 | (6.7)                  | 0.011              |                             |
| Married or unmarried cohabitation | 140   | (43.5)                       | 10                 | (7.1)                | 68                 | (48.6)                    | 37                 | (26.4)             | 25                 | (17.9)                 |                    |                             |
| Divorced or widowed               | 33    | (10.2)                       | 5                  | (15.2)               | 18                 | (54.5)                    | 5                  | (15.2)             | 5                  | (15.2)                 |                    |                             |
| Education status                  |       |                              |                    |                      |                    |                           |                    |                    |                    |                        |                    |                             |

|    |                               |        |         |        |                     |        |                     |        |                     |        |         |                    |
|----|-------------------------------|--------|---------|--------|---------------------|--------|---------------------|--------|---------------------|--------|---------|--------------------|
| 1  |                               |        |         |        |                     |        |                     |        |                     |        |         |                    |
| 2  |                               |        |         |        |                     |        |                     |        |                     |        |         |                    |
| 3  | Below highschool              | 91     | (30.7)  | 9      | (9.9)               | 50     | (54.9)              | 16     | (17.6)              | 16     | (17.6)  | 0.35               |
| 4  |                               |        |         |        |                     |        |                     |        |                     |        |         |                    |
| 5  | Above highschool              | 205    | (69.3)  | 25     | (12.2)              | 111    | (54.1)              | 47     | (22.9)              | 22     | (10.7)  |                    |
| 6  |                               |        |         |        |                     |        |                     |        |                     |        |         |                    |
| 7  |                               |        |         |        |                     |        |                     |        |                     |        |         |                    |
| 8  | IBS subtypes                  |        |         |        |                     |        |                     |        |                     |        |         |                    |
| 9  |                               |        |         |        |                     |        |                     |        |                     |        |         |                    |
| 10 | IBS-C                         | 35     | (10.8)  | 5      | (14.3)              | 19     | (54.3)              | 9      | (25.7)              | 2      | (5.7)   | 0.057              |
| 11 |                               |        |         |        |                     |        |                     |        |                     |        |         |                    |
| 12 | IBS-D                         | 134    | (41.2)  | 19     | (14.2)              | 63     | (47.0)              | 25     | (18.7)              | 27     | (20.1)  |                    |
| 13 |                               |        |         |        |                     |        |                     |        |                     |        |         |                    |
| 14 | IBS-M                         | 148    | (45.5)  | 15     | (10.1)              | 88     | (59.5)              | 34     | (23.0)              | 11     | (7.4)   |                    |
| 15 |                               |        |         |        |                     |        |                     |        |                     |        |         |                    |
| 16 | IBS-U                         | 8      | (2.5)   | 0      | (0.0)               | 6      | (75.0)              | 1      | (12.5)              | 1      | (12.5)  |                    |
| 17 |                               |        |         |        |                     |        |                     |        |                     |        |         |                    |
| 18 |                               |        |         |        |                     |        |                     |        |                     |        |         |                    |
| 19 |                               |        |         |        |                     |        |                     |        |                     |        |         |                    |
| 20 |                               |        |         |        |                     |        |                     |        |                     |        |         |                    |
| 21 | Symptom severity <sup>△</sup> | 291.99 | [84.79] | 277.76 | [72.53]             | 292.96 | [86.45]             | 291.46 | [85.82]             | 299.21 | [84.71] | 0.739 <sup>b</sup> |
| 22 |                               |        |         |        |                     |        |                     |        |                     |        |         |                    |
| 23 | Quality of life <sup>†</sup>  |        |         |        |                     |        |                     |        |                     |        |         |                    |
| 24 |                               |        |         |        |                     |        |                     |        |                     |        |         |                    |
| 25 |                               |        |         |        |                     |        |                     |        |                     |        |         |                    |
| 26 | Physical health               | 40.57  | [9.30]  | 41.97  | [9.02] <sup>§</sup> | 40.97  | [8.86] <sup>§</sup> | 42.05  | [9.17] <sup>§</sup> | 35.08  | [10.02] | 0.001 <sup>b</sup> |
| 27 |                               |        |         |        |                     |        |                     |        |                     |        |         |                    |
| 28 | Mental health                 | 39.22  | [12.69] | 36.66  | [12.35]             | 39.63  | [13.00]             | 39.92  | [11.96]             | 38.79  | [13.05] | 0.613 <sup>b</sup> |
| 29 |                               |        |         |        |                     |        |                     |        |                     |        |         |                    |
| 30 |                               |        |         |        |                     |        |                     |        |                     |        |         |                    |
| 31 |                               |        |         |        |                     |        |                     |        |                     |        |         |                    |
| 32 |                               |        |         |        |                     |        |                     |        |                     |        |         |                    |
| 33 |                               |        |         |        |                     |        |                     |        |                     |        |         |                    |
| 34 |                               |        |         |        |                     |        |                     |        |                     |        |         |                    |
| 35 |                               |        |         |        |                     |        |                     |        |                     |        |         |                    |
| 36 |                               |        |         |        |                     |        |                     |        |                     |        |         |                    |
| 37 |                               |        |         |        |                     |        |                     |        |                     |        |         |                    |
| 38 |                               |        |         |        |                     |        |                     |        |                     |        |         |                    |
| 39 |                               |        |         |        |                     |        |                     |        |                     |        |         |                    |
| 40 |                               |        |         |        |                     |        |                     |        |                     |        |         |                    |
| 41 |                               |        |         |        |                     |        |                     |        |                     |        |         |                    |
| 42 |                               |        |         |        |                     |        |                     |        |                     |        |         |                    |
| 43 |                               |        |         |        |                     |        |                     |        |                     |        |         |                    |
| 44 |                               |        |         |        |                     |        |                     |        |                     |        |         |                    |
| 45 |                               |        |         |        |                     |        |                     |        |                     |        |         |                    |
| 46 |                               |        |         |        |                     |        |                     |        |                     |        |         |                    |
| 47 |                               |        |         |        |                     |        |                     |        |                     |        |         |                    |

1  
2  
3  
4  
5  
6  
7  
8  
9  
10  
11  
12  
13  
14  
15  
16  
17  
18  
19  
20  
21  
22  
23  
24  
25  
26  
27  
28  
29  
30  
31  
32  
33  
34  
35  
36  
37  
38  
39  
40  
41  
42  
43  
44  
45  
46  
47

Table 2. Correlation Matrix for the Study Variables in IBS patients

|                    |                         | <b>BMI</b> | <b>Gender</b> | <b>Education</b> | <b>Symptom severity</b> | <b>Physical Health</b> | <b>Mental health</b> |
|--------------------|-------------------------|------------|---------------|------------------|-------------------------|------------------------|----------------------|
| <b>Pearson</b>     | <b>BMI</b>              | 1.000      |               |                  |                         |                        |                      |
| <b>Correlation</b> | <b>Gender</b>           | -0.050     | 1.000         |                  |                         |                        |                      |
|                    | <b>Education</b>        | -0.080     | -0.108        | 1.000            |                         |                        |                      |
|                    | <b>Symptom severity</b> | 0.065      | 0.059         | -0.048           | 1.000                   |                        |                      |
|                    | <b>Physical Health</b>  | -0.198*    | -0.070        | 0.204*           | -0.394*                 | 1.000                  |                      |
|                    | <b>Mental health</b>    | 0.037      | -0.022        | -0.040           | -0.303*                 | 0.046                  | 1.000                |

For peer review only

Table 3. Geometric mean values for physical health across categories of IBS-SSS level, by gender, age, family and education status, IBS subtypes and BMI

| Variable                          | Total |       |              | IBS -SSS |          |        | F value | p value |
|-----------------------------------|-------|-------|--------------|----------|----------|--------|---------|---------|
|                                   | N     | Mean  | 95% CI       | Mild     | Moderate | Severe |         |         |
| Total sample                      | 283   | 40.85 | 39.75, 41.96 | 45.64    | 43.77    | 36.98  | 23.63   | 0.000   |
| Gender                            |       |       |              |          |          |        |         |         |
| Male                              | 84    | 41.83 | 39.96, 43.73 | 44.18    | 45.00    | 37.41  | 8.88    | 0.000   |
| Female                            | 199   | 40.44 | 39.07, 41.80 | 46.36    | 43.19    | 36.82  | 15.18   | 0.000   |
| Age                               |       |       |              |          |          |        |         |         |
| 18-25                             | 66    | 41.91 | 39.83, 43.99 | 46.89    | 45.56    | 38.36  | 7.44    | 0.001   |
| 26-49                             | 145   | 41.02 | 39.55, 42.50 | 47.38    | 43.61    | 37.45  | 13.79   | 0.000   |
| ≥ 50                              | 71    | 39.61 | 36.99, 42.24 | 42.31    | 42.67    | 33.77  | 5.72    | 0.005   |
| Family status                     |       |       |              |          |          |        |         |         |
| Single                            | 124   | 41.59 | 40.08, 43.10 | 45.95    | 44.88    | 38.58  | 10.21   | 0.000   |
| Married or unmarried cohabitation | 127   | 40.23 | 38.43, 42.02 | 45.52    | 42.60    | 35.68  | 10.76   | 0.000   |
| Divorced or widowed               | 28    | 40.47 | 36.48, 44.45 | -        | 44.98    | 33.50  | 11.62   | 0.002   |

1  
2  
3  
4  
5  
6  
7  
8  
9  
10  
11  
12  
13  
14  
15  
16  
17  
18  
19  
20  
21  
22  
23  
24  
25  
26  
27  
28  
29  
30  
31  
32  
33  
34  
35  
36  
37  
38  
39  
40  
41  
42  
43  
44  
45  
46  
47

Education status

Below highschool

74 38.45 36.15, 40.75 48.34 42.41 33.52 11.05 0.000

Above highschool

189 42.12 40.84, 43.41 46.20 44.59 38.60 13.70 0.000

IBS subtypes \*

IBS-C

26 41.10 36.79, 45.41 48.85 46.62 35.06 5.84 0.009

IBS-D

118 40.96 39.22, 42.70 44.34 43.95 37.22 8.30 0.000

IBS-M

135 40.87 39.32, 42.42 45.96 43.41 37.24 10.61 0.000

BMI

< 18.5 kg/m<sup>2</sup>

31 42.37 39.05, 45.70 54.73 42.66 39.44 4.30 0.024

18.5-25 kg/m<sup>2</sup>

139 40.83 39.32, 42.34 46.33 43.60 37.41 11.65 0.000

25-30 kg/m<sup>2</sup>

53 42.39 39.92, 44.86 42.87 46.71 38.48 5.87 0.005

> 30 kg/m<sup>2</sup>

31 35.33 31.43, 39.23 38.35 42.54 29.35 7.92 0.002

Table 4. Geometric mean values for mental health across categories of IBS-SSS level, by gender, age, family and education status, IBS subtypes and BMI

| Variable                          | Total |       |              | IBS -SSS |          |        | <i>F</i> value | <i>p</i> value |
|-----------------------------------|-------|-------|--------------|----------|----------|--------|----------------|----------------|
|                                   | N     | Mean  | 95% CI       | Mild     | Moderate | Severe |                |                |
| Total sample                      | 283   | 39.27 | 37.77, 40.78 | 45.92    | 41.44    | 35.75  | 11.02          | 0.000          |
| Gender                            |       |       |              |          |          |        |                |                |
| Male                              | 84    | 39.30 | 36.29, 42.31 | 40.10    | 43.40    | 34.14  | 4.51           | 0.014          |
| Female                            | 199   | 39.26 | 37.53, 41.00 | 48.83    | 40.51    | 36.32  | 9.13           | 0.000          |
| Age                               |       |       |              |          |          |        |                |                |
| 18-25                             | 66    | 39.30 | 36.25, 42.36 | 40.03    | 40.39    | 38.32  | 0.22           | 0.806          |
| 26-49                             | 145   | 37.83 | 35.74, 39.93 | 45.02    | 41.04    | 33.55  | 9.17           | 0.000          |
| ≥ 50                              | 71    | 42.46 | 39.45, 45.52 | 49.39    | 42.89    | 39.19  | 2.16           | 0.124          |
| Family status                     |       |       |              |          |          |        |                |                |
| Single                            | 124   | 37.62 | 35.37, 39.86 | 38.70    | 39.95    | 35.70  | 1.68           | 0.191          |
| Married or unmarried cohabitation | 127   | 40.42 | 38.14, 42.71 | 48.45    | 42.44    | 35.21  | 9.83           | 0.000          |

|    |                           |     |       |              |       |       |       |       |       |
|----|---------------------------|-----|-------|--------------|-------|-------|-------|-------|-------|
| 1  |                           |     |       |              |       |       |       |       |       |
| 2  |                           |     |       |              |       |       |       |       |       |
| 3  | Divorced or widowed       | 28  | 41.88 | 37.34, 46.42 | -     | 44.01 | 38.59 | 1.45  | 0.239 |
| 4  |                           |     |       |              |       |       |       |       |       |
| 5  | Education status          |     |       |              |       |       |       |       |       |
| 6  |                           |     |       |              |       |       |       |       |       |
| 7  |                           |     |       |              |       |       |       |       |       |
| 8  | Below highschool          | 74  | 40.68 | 37.60, 43.75 | 53.80 | 45.51 | 34.58 | 9.22  | 0.000 |
| 9  |                           |     |       |              |       |       |       |       |       |
| 10 | Above highschool          | 189 | 38.56 | 36.77, 40.36 | 45.26 | 39.82 | 35.50 | 6.60  | 0.002 |
| 11 |                           |     |       |              |       |       |       |       |       |
| 12 |                           |     |       |              |       |       |       |       |       |
| 13 | IBS subtypes *            |     |       |              |       |       |       |       |       |
| 14 |                           |     |       |              |       |       |       |       |       |
| 15 | IBS-C                     | 26  | 39.95 | 34.25, 45.65 | 57.68 | 43.76 | 32.92 | 6.13  | 0.007 |
| 16 |                           |     |       |              |       |       |       |       |       |
| 17 | IBS-D                     | 118 | 39.02 | 36.60, 41.45 | 45.41 | 41.43 | 35.32 | 4.34  | 0.015 |
| 18 |                           |     |       |              |       |       |       |       |       |
| 19 | IBS-M                     | 135 | 38.96 | 36.89, 41.03 | 42.41 | 40.87 | 36.31 | 2.80  | 0.064 |
| 20 |                           |     |       |              |       |       |       |       |       |
| 21 |                           |     |       |              |       |       |       |       |       |
| 22 |                           |     |       |              |       |       |       |       |       |
| 23 | BMI                       |     |       |              |       |       |       |       |       |
| 24 |                           |     |       |              |       |       |       |       |       |
| 25 |                           |     |       |              |       |       |       |       |       |
| 26 | < 18.5 kg/m <sup>2</sup>  | 31  | 37.95 | 33.47, 42.43 | 49.71 | 37.78 | 35.60 | 1.73  | 0.196 |
| 27 |                           |     |       |              |       |       |       |       |       |
| 28 | 18.5-25 kg/m <sup>2</sup> | 139 | 39.39 | 37.18, 41.61 | 47.74 | 43.14 | 34.60 | 10.74 | 0.000 |
| 29 |                           |     |       |              |       |       |       |       |       |
| 30 | 25-30 kg/m <sup>2</sup>   | 53  | 39.86 | 36.42, 43.30 | 45.34 | 40.38 | 38.09 | 0.84  | 0.437 |
| 31 |                           |     |       |              |       |       |       |       |       |
| 32 |                           |     |       |              |       |       |       |       |       |
| 33 | > 30 kg/m <sup>2</sup>    | 31  | 39.47 | 43.69, 44.24 | 41.01 | 40.86 | 38.14 | 0.16  | 0.851 |
| 34 |                           |     |       |              |       |       |       |       |       |
| 35 |                           |     |       |              |       |       |       |       |       |

For peer review only

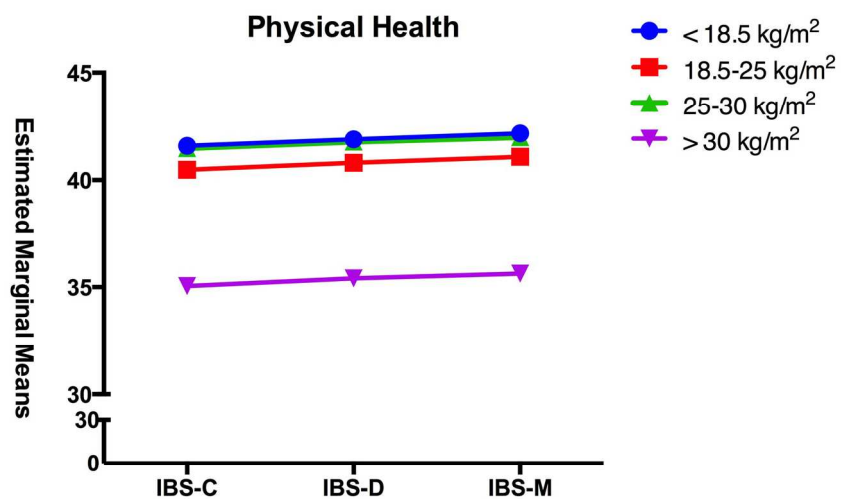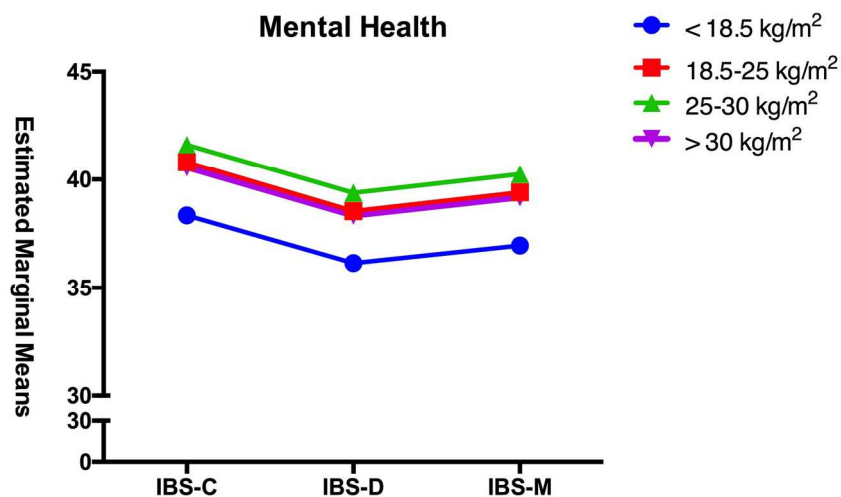

Figure 1

227x306mm (300 x 300 DPI)



1  
2  
3  
4  
5  
6  
7  
8  
9  
10  
11  
12  
13  
14  
15  
16  
17  
18  
19  
20  
21  
22  
23  
24  
25  
26  
27  
28  
29  
30  
31  
32  
33  
34  
35  
36  
37  
38  
39  
40  
41  
42  
43  
44  
45  
46  
47  
48  
49  
50  
51  
52  
53  
54  
55  
56  
57  
58  
59  
60

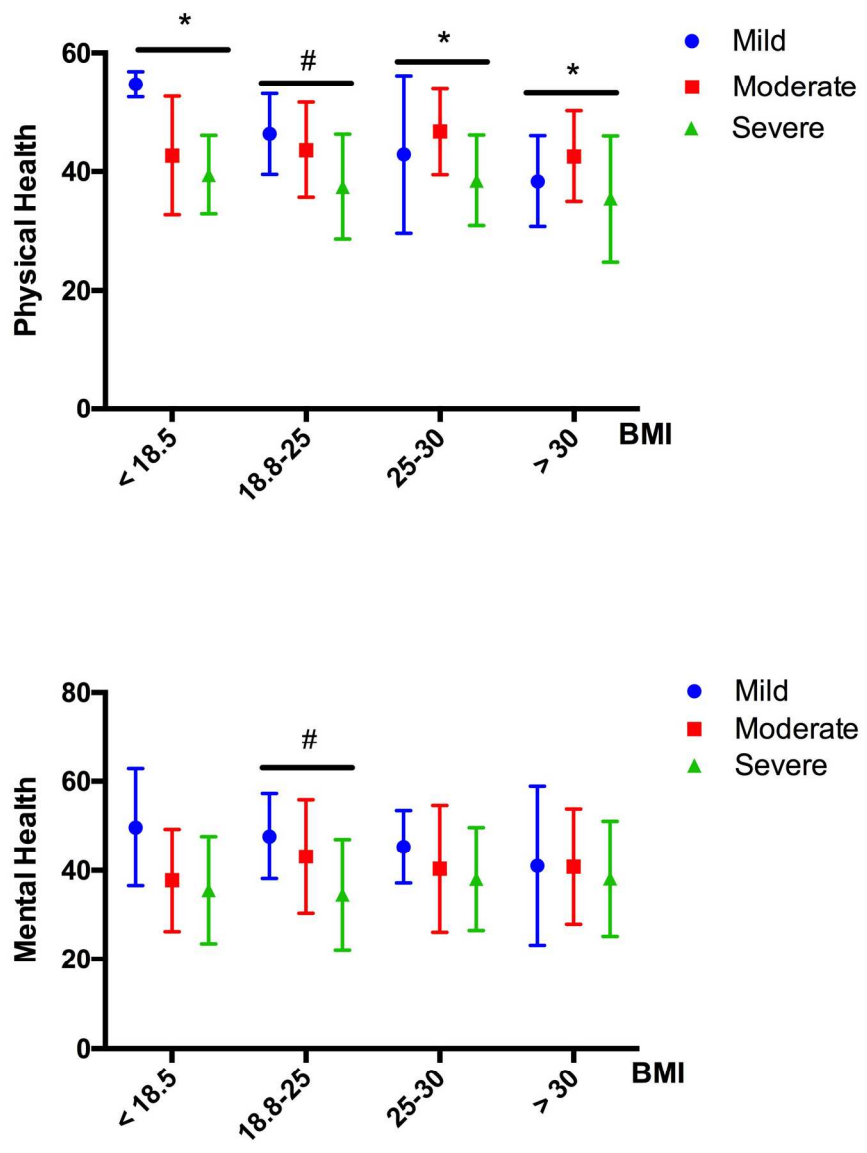

Figure 2

225x297mm (300 x 300 DPI)

STROBE Statement—Checklist of items that should be included in reports of *cross-sectional studies*

|                              | Item No | Recommendation                                                                                                                                                                                                                                                                                                                                                                                                            |
|------------------------------|---------|---------------------------------------------------------------------------------------------------------------------------------------------------------------------------------------------------------------------------------------------------------------------------------------------------------------------------------------------------------------------------------------------------------------------------|
| <b>Title and abstract</b>    | 1       | (a) Indicate the study's design with a commonly used term in the title or the abstract <b>【Page 1】</b><br>(b) Provide in the abstract an informative and balanced summary of what was done and what was found <b>【Pages 2 - 3】</b>                                                                                                                                                                                        |
| <b>Introduction</b>          |         |                                                                                                                                                                                                                                                                                                                                                                                                                           |
| Background/rationale         | 2       | Explain the scientific background and rationale for the investigation being reported <b>【Pages 4 - 5】</b>                                                                                                                                                                                                                                                                                                                 |
| Objectives                   | 3       | State specific objectives, including any prespecified hypotheses <b>【Pages 4 - 5】</b>                                                                                                                                                                                                                                                                                                                                     |
| <b>Methods</b>               |         |                                                                                                                                                                                                                                                                                                                                                                                                                           |
| Study design                 | 4       | Present key elements of study design early in the paper <b>【Pages 5 - 6】</b>                                                                                                                                                                                                                                                                                                                                              |
| Setting                      | 5       | Describe the setting, locations, and relevant dates, including periods of recruitment, exposure, follow-up, and data collection <b>【Page 6 - 7】</b>                                                                                                                                                                                                                                                                       |
| Participants                 | 6       | (a) Give the eligibility criteria, and the sources and methods of selection of participants <b>【Page 6】</b>                                                                                                                                                                                                                                                                                                               |
| Variables                    | 7       | Clearly define all outcomes, exposures, predictors, potential confounders, and effect modifiers. Give diagnostic criteria, if applicable <b>【Pages 6 - 7】</b>                                                                                                                                                                                                                                                             |
| Data sources/<br>measurement | 8*      | For each variable of interest, give sources of data and details of methods of assessment (measurement). Describe comparability of assessment methods if there is more than one group <b>【Pages 6 - 7】</b>                                                                                                                                                                                                                 |
| Bias                         | 9       | Describe any efforts to address potential sources of bias <b>【Page 6】</b>                                                                                                                                                                                                                                                                                                                                                 |
| Study size                   | 10      | Explain how the study size was arrived at <b>【Page 6】</b>                                                                                                                                                                                                                                                                                                                                                                 |
| Quantitative variables       | 11      | Explain how quantitative variables were handled in the analyses. If applicable, describe which groupings were chosen and why <b>【Pages 6 - 7】</b>                                                                                                                                                                                                                                                                         |
| Statistical methods          | 12      | (a) Describe all statistical methods, including those used to control for confounding <b>【Pages 8 - 9】</b><br>(b) Describe any methods used to examine subgroups and interactions <b>【Page 8】</b><br>(c) Explain how missing data were addressed <b>【Page 8】</b><br>(d) If applicable, describe analytical methods taking account of sampling strategy <b>【N/A】</b><br>(e) Describe any sensitivity analyses <b>【N/A】</b> |
| <b>Results</b>               |         |                                                                                                                                                                                                                                                                                                                                                                                                                           |
| Participants                 | 13*     | (a) Report numbers of individuals at each stage of study—eg numbers potentially eligible, examined for eligibility, confirmed eligible, included in the study, completing follow-up, and analysed <b>【Page 9; table 1】</b><br>(b) Give reasons for non-participation at each stage <b>【N/A】</b><br>(c) Consider use of a flow diagram <b>【Page 9】</b>                                                                     |
| Descriptive data             | 14*     | (a) Give characteristics of study participants (eg demographic, clinical, social) and information on exposures and potential confounders <b>【Pages 9 - 11】</b><br>(b) Indicate number of participants with missing data for each variable of interest <b>【Page 9; table 1】</b>                                                                                                                                            |
| Outcome data                 | 15*     | Report numbers of outcome events or summary measures <b>【Pages 9 - 11】</b>                                                                                                                                                                                                                                                                                                                                                |
| Main results                 | 16      | (a) Give unadjusted estimates and, if applicable, confounder-adjusted estimates and their precision (eg, 95% confidence interval). Make clear which confounders were adjusted for and why they were included <b>【Pages 9 - 11; table 3】</b>                                                                                                                                                                               |

|                          |    |                                                                                                                                                                                                   |
|--------------------------|----|---------------------------------------------------------------------------------------------------------------------------------------------------------------------------------------------------|
|                          |    | (b) Report category boundaries when continuous variables were categorized <b>【N/A】</b>                                                                                                            |
|                          |    | (c) If relevant, consider translating estimates of relative risk into absolute risk for a meaningful time period <b>【N/A】</b>                                                                     |
| Other analyses           | 17 | Report other analyses done—eg analyses of subgroups and interactions, and sensitivity analyses <b>【Pages 9 – 11; figures 1 -2; tables 2 - 3】</b>                                                  |
| <b>Discussion</b>        |    |                                                                                                                                                                                                   |
| Key results              | 18 | Summarise key results with reference to study objectives <b>【Page 11】</b>                                                                                                                         |
| Limitations              | 19 | Discuss limitations of the study, taking into account sources of potential bias or imprecision. Discuss both direction and magnitude of any potential bias <b>【Page 14】</b>                       |
| Interpretation           | 20 | Give a cautious overall interpretation of results considering objectives, limitations, multiplicity of analyses, results from similar studies, and other relevant evidence <b>【Pages 11 - 15】</b> |
| Generalisability         | 21 | Discuss the generalisability (external validity) of the study results <b>【Pages 12 - 15】</b>                                                                                                      |
| <b>Other information</b> |    |                                                                                                                                                                                                   |
| Funding                  | 22 | Give the source of funding and the role of the funders for the present study and, if applicable, for the original study on which the present article is based <b>【Page 1 and Page 15】</b>         |

\*Give information separately for exposed and unexposed groups.

**Note:** An Explanation and Elaboration article discusses each checklist item and gives methodological background and published examples of transparent reporting. The STROBE checklist is best used in conjunction with this article (freely available on the Web sites of PLoS Medicine at <http://www.plosmedicine.org/>, Annals of Internal Medicine at <http://www.annals.org/>, and Epidemiology at <http://www.epidem.com/>). Information on the STROBE Initiative is available at [www.strobe-statement.org](http://www.strobe-statement.org).

# BMJ Open

## Symptom severity and health-related quality of life in patients with irritable bowel syndrome: The role of body mass index

|                                 |                                                                                                                                                                                                                                                                                                                                                                                                                              |
|---------------------------------|------------------------------------------------------------------------------------------------------------------------------------------------------------------------------------------------------------------------------------------------------------------------------------------------------------------------------------------------------------------------------------------------------------------------------|
| Journal:                        | <i>BMJ Open</i>                                                                                                                                                                                                                                                                                                                                                                                                              |
| Manuscript ID                   | bmjopen-2017-019453.R2                                                                                                                                                                                                                                                                                                                                                                                                       |
| Article Type:                   | Research                                                                                                                                                                                                                                                                                                                                                                                                                     |
| Date Submitted by the Author:   | 07-Mar-2018                                                                                                                                                                                                                                                                                                                                                                                                                  |
| Complete List of Authors:       | Dong, Yuanjun; Universitätsklinikum Heidelberg Medizinische Klinik, Clinic for General Internal Medizin and Psychosomatics<br>Berens, Sabrina; Universitätsklinikum Heidelberg Medizinische Klinik<br>Eich, Wolfgang; Universitätsklinikum Heidelberg Medizinische Klinik<br>Schaefer, Rainer; University Hospital Basel, Department of Psychosomatics<br>Tesarz, Jonas; Universitätsklinikum Heidelberg Medizinische Klinik |
| <b>Primary Subject Heading</b>: | Gastroenterology and hepatology                                                                                                                                                                                                                                                                                                                                                                                              |
| Secondary Subject Heading:      | Nutrition and metabolism, Mental health                                                                                                                                                                                                                                                                                                                                                                                      |
| Keywords:                       | Irritable bowel syndrome, Body mass index, Symptom severity, Quality of life                                                                                                                                                                                                                                                                                                                                                 |
|                                 |                                                                                                                                                                                                                                                                                                                                                                                                                              |

SCHOLARONE™  
Manuscripts

Only

1 **Original Article**

2  
3  
4  
5  
6 **Symptom severity and health-related quality of life in patients with irritable bowel syndrome: The role**  
7  
8 **of body mass index**  
9

10  
11  
12  
13 Yuanjun Dong<sup>1</sup>, M.M., Sabrina Berens<sup>1</sup>, M.Sc., Wolfgang Eich<sup>1</sup>, M.D., PhD., Rainer Schaefer<sup>2</sup>, M.D., PhD.,

14  
15  
16 Jonas Tesarz<sup>1,\*</sup>, M.D. PhD.  
17  
18  
19  
20

21 <sup>1</sup> **Department of General Internal Medicine and Psychosomatics, University Hospital Heidelberg, Im**  
22  
23 **Neuenheimer Feld 410, 69120 Heidelberg, Germany**  
24  
25

26 <sup>2</sup> **Department of Psychosomatics, Division of Internal Medicine, University Hospital Basel, University**  
27  
28 **of Basel, Hebelstrasse 2, CH-4031 Basel, Switzerland**  
29  
30

31 **\* Corresponding Author.**  
32  
33

34 **Address correspondence to:** Jonas Tesarz, Department of General Internal Medicine and Psychosomatics,  
35  
36 University Hospital Heidelberg, Im Neuenheimer Feld 410, 69120 Heidelberg, Germany. Tel: 0049  
37  
38 /6221/56-37862, E-mail: *Jonas.Tesarz@med.uni-heidelberg.de*  
39  
40  
41  
42  
43  
44  
45  
46  
47  
48  
49  
50  
51  
52  
53  
54  
55  
56  
57  
58  
59  
60

## Abstract

### Objective

The aim of this study was to describe the body mass index (BMI) distribution in patients with irritable bowel syndrome (IBS) based on the Rome III criteria, and to evaluate the association of BMI with symptom severity and quality of life (QOL).

### Methods

A cross-sectional study was carried out in patients visiting our outpatient Functional Gastrointestinal Disorders specialty clinic. IBS diagnosis was made based on ROME III criteria. IBS symptom severity was investigated using the IBS severity score system (IBS-SSS). QOL was assessed using the Short-Form-36-Health-Survey (SF-36), which consists of physical health and mental health.

### Results

366 patients (252 females) who fulfilled ROME III criteria and provided complete BMI data ( $23.90 \pm 5.22$  kg/m<sup>2</sup>) were included. Overall, 59.0% of patients with IBS were in the normal weight range, 30.3% were overweight or obese, and 10.7% were underweight. Both physical and mental health decreased significantly with the severity of symptom (all  $p < 0.01$ ). We adjusted all the confounders (age, gender, family status, education status and IBS subtypes). Taking physical health into consideration, BMI and symptom severity significantly predicted the physical health of QOL ( $\beta = -0.376$ ,  $\Delta R^2 = 0.137$ ,  $p < 0.01$ ;  $\beta = -0.135$ ,  $\Delta R^2 = 0.017$ ,  $p < 0.05$ ). Taking mental health into consideration, symptom severity ( $\beta = -0.280$ ,  $\Delta R^2 = 0.076$ ,  $p < 0.01$ ) was significant predictor of mental health. However, BMI didn't account for an additional significant amount of variance in mental health of QOL ( $p > 0.05$ ).

### Conclusion

Being overweight is a phenomenon in patients with IBS regardless of IBS subtype. The association between QOL and symptom severity followed a negative dose response pattern. Patients with higher BMI

1 were more frequently in poor physical health. However, this kind of relationship was not found in BMI and  
2  
3 mental health of QOL.  
4

5  
6 **Keywords:**

7  
8 Irritable bowel syndrome; Body mass index; Symptom severity; Quality of life  
9

10  
11  
12  
13  
14  
15  
16 **Strengths and limitations of this study:**

- 17  
18 1) This study uses a large and well described patient cohort with a validated diagnosis of IBS based on the  
19 Rome III criteria;  
20  
21 2) The association between QOL and symptom severity followed a negative dose response pattern;  
22  
23 3) Patients with higher BMI were more frequently in poor physical health. However, this kind of relationship  
24 was not found in BMI and mental health of QOL.  
25  
26 4) The study was cross-sectional, therefore it is not possible to infer causation;  
27  
28 5) BMI cannot fully reflect the impact of the factors of fatty mass, dietary habit, other lifestyle factors such as  
29 physical exercise on IBS.  
30  
31  
32  
33  
34  
35  
36  
37  
38  
39  
40  
41  
42  
43  
44  
45  
46  
47  
48  
49  
50  
51  
52  
53  
54  
55  
56  
57  
58  
59  
60

## 1 Introduction

Irritable bowel syndrome (IBS) is a chronic and common functional bowel disorder that is characterized by recurrent abdominal pain or discomfort associated with altered bowel habits [1]. According to the Rome criteria, IBS is classified into four subtypes [IBS with diarrhoea (IBS-D), IBS with constipation (IBS-C), mixed IBS (IBS-M) and un-subtyped IBS (IBS-U)] based on the predominant abdominal symptomatology [1]. It has been frequently reported that IBS leads to impaired quality of life (QOL) [2-4]. The symptoms of IBS are associated with different eating habits [5]. In a randomized controlled trial, a diet low in FODMAPs can improve the IBS-D patients' QOL, anxiety, and activity impairment [6].

Epidemiologic studies have shown that as many as 16.5% of adults in European countries are obese [body mass index (BMI) > 30 kg/m<sup>2</sup>] [7] and that the incidence of obesity is increasing [8]. Additionally, a cross-sectional multicentre study found that more than 63% of outpatients and 80% of inpatients in gastroenterological centres suffered from significant changes in body composition [9]. In addition, Underweight (BMI < 18.5 kg/m<sup>2</sup>) or obese body condition (BMI > 30 kg/m<sup>2</sup>) are both associated with multiple abdominal symptoms leading to reduced QOL [10, 11]. However, although extensive research has been carried out on the prevalence of obesity in the general population and in connection with numerous diseases, there is only little published data on the prevalence and clinical relevance of nutritional status in patients with IBS. Locke *et al.* [12] found no association between IBS status and BMI. However, this study was a population-based study. Studies with large enough sample size based on clinic patients are missing so far.

Therefore, the aim of this study was to describe the BMI distribution in patients with IBS based on the Rome III criteria, and to evaluate the association of BMI with symptom severity and the physical health and mental health of QOL.

## 2 Methods



1 This cross-sectional survey included patients evaluated at the Functional Gastrointestinal Disorders  
2 (FGIDs) specialty clinic of the Department of General Internal Medicine and Psychosomatics of Heidelberg  
3 University Hospital, which is a tertiary care facility. All patients who completed our routine baseline  
4 documentation were enrolled. The routine data from individual health records was transferred into the  
5 database and pseudonymized. This study was approved by the Ethics Committee of Heidelberg University  
6 (S-041/2014) and carried out in accordance with the Declaration of Helsinki.

## 18 **2.1 Patients recruitment**

21 From 01/2011 to 12/2016, patients' clinical data were consecutively collected from our outpatient FGIDs  
22 clinic at Heidelberg University Hospital for this explorative and descriptive study. All patients  $\geq 18$  years of  
23 age were included, if they fulfilled the Rome III criteria for the diagnosis of IBS [1]. The subtype criteria for  
24 IBS were based on stool consistency as assessed by the Bristol Stool Scale (BSS) and Rome III criteria [13].  
25 Demographic data including gender, age, family status, level of education and residence, was also collected at  
26 baseline using the Psychosomatic Basis Documentation Questionnaire (Psy-BaDo) [14].

## 39 **2.2 Patient Involvement**

41 There is no patient involved in the conduct of the study. However, in order to increase the clinical  
42 relevance of the study, we established an advisory group to answer the related questions.

## 49 **2.3 Measurement of IBS symptom severity**

51 Patients rated the severity of their IBS symptoms by completing the IBS severity score system (IBS-SSS)  
52 [15]. The IBS-SSS has a maximum score of 500 and comprises five items: frequency and intensity of  
53 abdominal pain, severity of abdominal distension, dissatisfaction with bowel habits, and interference of IBS

1 with daily life. Based on validated cut-off values, three IBS severity subgroups can be distinguished: Mild  
2  
3 (IBS-SSS: 75-175), Moderate (IBS-SSS: 175-300) and Severe (IBS-SSS: > 300). The German version of this  
4  
5 questionnaire was validated by Betz et al. [16] and the total score was computed in accordance with the  
6  
7 manual.  
8  
9

## 10 11 12 13 **2.4 Measurement of BMI**

14  
15  
16 In the context of self-reporting, BMI was calculated as the individual's body weight (kg) divided by the  
17  
18 square of their height (m). BMI was categorized according to the World Health Organization (WHO)  
19  
20 classification of physical status [17]: underweight (BMI < 18.5 kg/m<sup>2</sup>), normal weight (BMI 18.5–25 kg/m<sup>2</sup>),  
21  
22 overweight (25–30 kg/m<sup>2</sup>), or obese (BMI > 30 kg/m<sup>2</sup>).  
23  
24  
25  
26  
27  
28

## 29 **2.5 Measurement of quality of life**

30  
31 Quality of life was measured using the Short Form 36 Health Survey (SF-36) [18]. SF-36 is a 36-item,  
32  
33 patient-reported survey of patient quality of life, which consists of a physical health index and mental health  
34  
35 index. The SF-36 is widely used and well validated for assessing generic health outcomes. Each scale is  
36  
37 directly transformed into a 0-100 scale. Lower scores represent a higher degree of disability. Validation of the  
38  
39 German version was performed by Morfeld *et al.* [19].  
40  
41  
42  
43  
44  
45  
46

## 47 **2.6 Statistical analysis**

48  
49 Routine data were transformed into an SPSS file and evaluated using the statistical program SPSS (IBM,  
50  
51 version 22.0). Descriptive statistics are presented as the means and standard deviation (*SD*) for continuous  
52  
53 variables and as absolute numbers and percentages for categorical variables. All analyses were explorative  
54  
55 and not of a confirmatory nature. All primary and secondary variables were first tested for normal distribution.  
56  
57  
58  
59  
60

1 For normally distributed variables, the mean and standard deviation were calculated. Variables that lacked a  
2  
3 normal distribution were reported using the median and interquartile range. The Mann-Whitney U Test was  
4  
5 used to assess the level of significance because a number of participants differed between the groups.  
6  
7 Comparison of socio-demographical and anthropometric data according to BMI was performed using analysis  
8  
9 of variance (ANOVA) and nonparametric tests in the first instance. Where significant group differences were  
10  
11 detected based on ANOVA, post-hoc least significant difference tests were conducted to compare the study  
12  
13 groups in a pairwise fashion. We also used the Pearson correlation coefficients to investigate the linear  
14  
15 association between demographics, BMI, clinical and psychological features. Hierarchical multiple regression  
16  
17 was used to help understand the impact of potential confounders as well as the predictive role of BMI in  
18  
19 physical health and mental health of QOL. We tested the impact of the confounders (gender, age, family  
20  
21 status, education status & IBS subtypes) in Model 1. In model 2, we added the symptom severity. BMI was  
22  
23 added in model 3. All tests were two-sided and statistical significance was accepted if  $p < 0.05$ .  
24  
25  
26  
27  
28  
29  
30  
31  
32  
33

### 34 **3 Results**

#### 35 **3.1 Characteristics of study sample**

36  
37  
38  
39 A total of 576 patients completed the questionnaire. Excluding 113 patients whose Rome III criteria data  
40  
41 were partly missing, eventually 366 patients with IBS were enrolled in this study (114 males, 252 females;  
42  
43 mean BMI  $23.90 \pm 5.22$  kg/m<sup>2</sup>). The demographic and baseline characteristics of the patients with IBS among  
44  
45 the different subtypes are summarized in Table 1. Of the included subjects, the most frequent IBS subtype was  
46  
47 IBS-M (45.9%), followed by IBS-D (41.3%), and IBS-C (10.1%). Only 59.0% of patients with IBS were  
48  
49 within the normal weight range, whereas 30.3% were overweight or obese, and only a minority were  
50  
51 underweight (10.7%). The percentage of obese patients was highest in IBS-D (17.9%,  $p < 0.01$ ). Taking  
52  
53 gender into account, 5.3% of males and 13.1% of females were underweight. Additionally, 7.0% of males and  
54  
55  
56  
57  
58  
59  
60

13.1% of females were obese and 26.3% of males and 15.9% of females were overweight. Overall, patients reported moderate to severe IBS symptom severity (IBS-SSS range: 125 - 484) and lower QOL (physical health range of SF-36: 15.19 – 64.00, mental health range of SF-36: 7.89 – 65.85).

### 3.2 Correlations between BMI, symptom severity and QOL

Pearson product-moment correlations (Table 2) indicated that BMI was negatively correlated with physical health ( $r = -0.177, p < 0.01$ ). Age was negatively correlated with symptom severity ( $r = -0.129, p < 0.05$ ) and positively correlated with physical health ( $r = 0.167, p < 0.01$ ). Additionally, symptom severity was negatively correlated with physical health ( $r = -0.394, p < 0.01$ ) and mental health ( $r = -0.268, p < 0.01$ ).

### 3.3 Characteristics of BMI, symptom severity and QOL Across Demographic and IBS subtypes

As shown in Table 1, male reported significantly higher physical health problems than female ( $t = 2.141, p < 0.05$ ). Compare with older patients (age > 50), the younger patients (age 18 - 49) reported significantly lower BMI level ( $t = -3.20, p < 0.01$ ), worse symptom severity ( $t = 2.039, p < 0.05$ ) and worse mental health ( $t = -2.528, p < 0.05$ ). Married or unmarried cohabitation patients were significantly higher in BMI level than single patients ( $p < 0.01$ ). The patients with below high school education reported significantly higher physical health problems than those who with above high school education ( $t = -3.376, p < 0.01$ ). Compared with IBS-M patients, the IBS-D patients reported significantly higher BMI level ( $p < 0.05$ ).

### 3.4 the predictive role of BMI in physical health and mental health of QOL

As shown in Table 3, the hierarchical multiple regression examined the relationship between dependent variable (physical health) and independent variables (symptom severity and BMI). Model 1 was significant ( $F = 2.448, p < 0.05$ ) and predicted 5.1% of the variance in physical health. Education status ( $\beta = 0.177, p <$

0.01) was significant predictor of physical health. In model 2, symptom severity significantly added to the amount of variance in the dependent accounted for in the model ( $\Delta R^2 = 0.137$ ,  $\Delta F = 53.283$ ,  $p < 0.01$ ). In model 3, BMI also significantly added to the amount of variance in the dependent accounted for in the model ( $\Delta R^2 = 0.017$ ,  $\Delta F = 6.581$ ,  $p < 0.01$ ). Similarly, when mental health was used as the dependent variable, Model 1 was insignificant ( $F = 1.309$ ,  $p > 0.05$ ). In model 2, symptom severity significantly increased the amount of variance in the dependent accounted for in the model ( $\Delta R^2 = 0.076$ ,  $\Delta F = 26.671$ ,  $p < 0.01$ ). Taking both model 1 and model 2 into consideration, it predicted 10.4% of the variance in mental health. In model 3, BMI didn't account for an additional significant amount of variance in mental health ( $\Delta R^2 = 0.000$ ,  $\Delta F = 0.057$ ,  $p > 0.05$ ).

#### 4 Discussion

This study sought to describe the BMI distribution in patients with IBS based on the Rome III criteria, and to evaluate the association of BMI with symptom severity and the physical health and mental health of QOL. Therefore, we used standardized questionnaires and medical records to confirm the diagnosis and to assess patient symptoms and quality of life.

Our data show that being overweight is a common phenomenon in patients with IBS regardless of IBS subtype. These findings are in agreement with the results of a previous study based on obese patients in France, which found that 30.0% of obese patients had IBS [20]. We found that almost 40% of patients with IBS were not in the normal weight range, which is consistent with previous results [21]. What is worth noting is that, the overweight and obesity rates in the general adult population in Germany [7] are higher than those found in our IBS cohort. According to the German Health Update (GEDA) [7], in 2012 the overweight rate of adults was 36.2% and the obese rate was 16.5%. The causal relationship between IBS and abnormal body weight are hard to elucidate. However, abnormal body weight has an undeniable influence in both patients

1 with IBS and in the general population. Interestingly, the distribution of weight was similar between the  
2  
3 different IBS groups. In particular, there was no difference between IBS-C and IBS-M. Notably, in IBS-D the  
4  
5 percentage of obese patients reached 17.9%. Lee et al. [22] evaluated the relationship between visceral  
6  
7 adipose tissue and the risk of IBS and suggested that disturbances of visceral fat may be more common in  
8  
9 IBS-D patients. In addition, another Korean study found increased intestinal permeability in IBS-D patients  
10  
11 [23]. One possible explanation is that the increase in visceral fat leads to an increase in intestinal osmolality  
12  
13 [24] and then leads to the chronic diarrhea. These studies, however, were confined to patients from South  
14  
15 Korea. Therefore, further research is needed to these findings.  
16  
17  
18  
19  
20

21 IBS has a significant impact on patients' QOL [25]. Our data show an association between symptom  
22  
23 severity and QOL with regard to physical and mental health. The patients in our study reported moderate to  
24  
25 severe IBS symptom severity and lower QOL. What's more, this association followed a negative dose  
26  
27 response pattern. We partly agree with the study of Amouretti et al. [26], which found that the IBS patients  
28  
29 who reported their symptoms as severe or very severe had a very poor QoL compared with those who reported  
30  
31 their symptoms as moderate. Their study did not distinguish between physical and mental health and did not  
32  
33 consider the effects of confounding factors such as BMI. This is an interesting but not completely new result  
34  
35 which gives rise to the question of what mechanisms are responsible for this association.  
36  
37  
38  
39  
40

41 Through the hierarchical multiple regression, we tested the relationship between dependent variable  
42  
43 (QOL) and independent variables (symptom severity & BMI). We excluded the impact of the confounders  
44  
45 (gender, age, family status, education status & IBS subtypes). The correlation between symptom severity and  
46  
47 QOL was significantly negative no matter which BMI level was. Our findings show that BMI was significant  
48  
49 predictor of physical health of QOL. Patients with higher BMI were more frequently in poor physical health.  
50  
51 This is in line with previous studies [11], in that increasing BMI is associated with increased upper  
52  
53 gastrointestinal symptoms, bloating, and diarrhoea. Obesity may lead to more physiological stress on organs.  
54  
55  
56  
57  
58  
59

1 Richards *et al.* [27] reported that obese patients have more severe pain and are to a larger extent restricted in  
2  
3 their daily functioning compared to patients of normal weight. An additional finding of our study was that  
4  
5 BMI didn't account for an additional significant amount of variance in mental health of QOL. This was  
6  
7 inconsistent with findings by Mykletun [28], which found that BMI had significant association with IBS with  
8  
9 regard to anxiety and mood disorders. However, their study evaluated only female patients. The findings of  
10  
11 genome-wide association studies, from the genetic perspective, suggest the presence of many genetic loci each  
12  
13 with a small effect influencing susceptibility to mental health symptoms (depression and anxiety) [29]. We  
14  
15 can therefore hypothesise that, the unpredictable association between risk of mental health and BMI in our  
16  
17 study may be due to non-modifiable genetic influences which predispose individuals to bad mental health.  
18  
19  
20  
21  
22

23  
24 Several limitations of this study must be taken into account. Firstly, the study was cross-sectional,  
25  
26 therefore, it is impossible to infer causation. Secondly, BMI was based on the self-reported height and weight  
27  
28 of patients and computed without objective measurement, therefore bias may have been introduced. Patients  
29  
30 may occasionally underreport or overreport their weight and height leading to an underestimation of  
31  
32 underweight or obese patients. However, in the Nutrinet-Santé study, researchers reported that deviations in  
33  
34 self-reported BMIs from questionnaires can be ignored because their results confirmed the validity and  
35  
36 agreement of self-reported data with measured data [30, 31]. The choice of SF-36 as the only QOL tool may  
37  
38 partly miss the relationship between symptom severity and QOL. Moreover, BMI is associated with a  
39  
40 multitude of different factors, such as genetics, fatty mass, dietary habit or physical exercise. Thus, BMI  
41  
42 cannot fully reflect the impact of those factors on IBS in more details and more research is needed. The  
43  
44 strengths of this study, however are the use of a large patient cohort with a validated diagnosis of IBS based on  
45  
46 the Rome III criteria.  
47  
48  
49  
50  
51  
52

53  
54 To conclude, being overweight is a common phenomenon in IBS patients regardless of IBS subtypes.  
55  
56 Our data further suggest that overweight and obesity may have a relevant influence on QOL. Patients with  
57  
58

1 higher BMI were more frequently in poor physical health. The findings have some implications for future  
2  
3 practice. Clinical doctors should pay special attention to abnormal weight in IBS patients as this may be an  
4  
5 indicator of a poorer QOL, especially with regard to the physical health.  
6  
7  
8  
9  
10  
11  
12

### 13 **References:**

14  
15  
16 [1] Drossman DA. The functional gastrointestinal disorders and the Rome III process. *Gastroenterology*  
17  
18 2006;130:1377-1390.

19  
20  
21 [2] Lacy, Brian E. Perspective: An easier diagnosis. *Nature* 2016;533.7603: S107-S107.

22  
23  
24 [3] Ljótsson B, Hesser H, Andersson E, et al. Provoking symptoms to relieve symptoms: a randomized  
25  
26 controlled dismantling study of exposure therapy in irritable bowel syndrome. *Behaviour Research and*  
27  
28 *Therapy* 2014;55:27-39.

29  
30  
31 [4] Hoekman, Daniël R, et al. Annual Costs of Care for Pediatric Irritable Bowel Syndrome, Functional  
32  
33 Abdominal Pain, and Functional Abdominal Pain Syndrome. *The Journal of Pediatrics*  
34  
35 2015;167.5:1103-1108.

36  
37  
38 [5] Hayes P, Corish C, O'mahony E, Quigley EMM. A dietary survey of patients with irritable bowel  
39  
40 syndrome. *Journal of human nutrition and dietetics* 2014; 27(s2): 36-47

41  
42  
43 [6] Eswaran S, Chey WD, Jackson K, et al. A Diet Low in Fermentable Oligo-, Di-, and Monosaccharides and  
44  
45 Polyols Improves Quality of Life and Reduces Activity Impairment in Patients with Irritable Bowel Syndrome  
46  
47 and Diarrhea. *Clinical Gastroenterology and Hepatology* 2017; 15:1817-1819.

48  
49  
50 [7] Lange C, Jentsch F, Allen J, et al. Data Resource Profile: German Health Update (GEDA)—the health  
51  
52 interview survey for adults in Germany. *International journal of epidemiology* 2015; 44: 442-450.  
53  
54  
55  
56  
57  
58  
59  
60



- 1 [8] Gracey M, King M. Indigenous health part 1: determinants and disease patterns. *The Lancet*  
2  
3 2009;374:65-75.  
4
- 5 [9] Rizzi M, Mazzuoli S, Regano N, et al. Undernutrition, risk of malnutrition and obesity in  
6  
7 gastroenterological patients: A multicenter study. *World journal of gastrointestinal oncology* 2016; 8: 563.  
8  
9
- 10 [10] van Oijen MG, Josemanders DF, Laheij RJ, van Rossum LG, Tan AC, Jansen JB. Gastrointestinal  
11  
12 disorders and symptoms: does body mass index matter? *The Netherlands Journal of Medicine* 2006;64:45–49.  
13  
14
- 15 [11] Talley NJ, Howell S, Poulton R. Obesity and chronic gastrointestinal tract symptoms in young adults: a  
16  
17 birth cohort study. *The American Journal of Gastroenterology* 2004;99:1807–1814.  
18  
19
- 20 [12] Locke GR, Zinsmeister AR, Schleck CD, et al. Psychosocial distress and somatic symptoms in  
21  
22 community subjects with irritable bowel syndrome: a psychological component is the rule. *The American*  
23  
24 *Journal of Gastroenterology* 2009;104:1772-1779.  
25  
26
- 27 [13] Heaton KW, Gosh S. Relation between stool form on a seven point scale and symptoms of urgency,  
28  
29 straining, and incomplete evacuation. *Gut* 1989;30:A1465-A1465.  
30  
31
- 32 [14] Heuft G. Praxis der Qualitätssicherung in der Psychotherapie: das Manual zur Psy-BaDo;[entsprechend  
33  
34 den Empfehlungen der psychotherapeutischen Fachgesellschaften]. *Thieme* 1998.  
35  
36
- 37 [15] Kaptchuk TJ, Friedlander E, Kelley JM, et al. Placebos without deception: a randomized controlled trial  
38  
39 in irritable bowel syndrome. *PloS One* 2010;5: e15591.  
40  
41
- 42 [16] Betz C, Mannsdoerfer K, Bischoff SC. Validation of the IBS-SSS. *Zeitschrift für Gastroenterologie*  
43  
44 2013;51:1171-1176.  
45  
46
- 47 [17] World Health Organization. Physical status: The use of and interpretation of anthropometry, Report of a  
48  
49 WHO Expert Committee 1995.  
50  
51
- 52 [18] Jenkinson C, Coulter A, Wright L. Short form 36 (SF36) health survey questionnaire: normative data for  
53  
54 adults of working age. *BMJ* 1993;306:1437-1440.  
55  
56  
57  
58  
59  
60

- 1 [19] Morfeld M, Kirchberger I, Bullinger M. SF-36 Fragebogen zum Gesundheitszustand: Deutsche Version  
2  
3 des Short Form-36 Health Survey. *Hogrefe* 2011.  
4
- 5 [20] Schneck AS, Anty R, Tran A, et al. Increased Prevalence of Irritable Bowel Syndrome in a Cohort of  
6  
7 French Morbidly Obese Patients Candidate for Bariatric Surgery. *Obesity surgery* 2016; 26: 1525-1530.  
8  
9
- 10 [21] Rodríguez LA. One-year follow-up of newly diagnosed irritable bowel syndrome patients *Alimentary*  
11  
12 *Pharmacology and Therapeutics* 1999;13:1097-1102.  
13  
14
- 15 [22] Lee CG, Lee JK, Kang YS, et al. Visceral abdominal obesity is associated with an increased risk of  
16  
17 irritable bowel syndrome. *The American journal of gastroenterology* 2015;110:310-319.  
18  
19
- 20 [23] Lee H, Park JH, Park DI et al. Mucosal mast cell count is associated with intestinal permeability in  
21  
22 patients with diarrhea predominant irritable bowel syndrome. *Journal of Neurogastroenterology and Motility*  
23  
24 2013;19:244-250.  
25  
26
- 27 [24] Eslick GD. Gastrointestinal symptoms and obesity: a meta-analysis. *Obesity Reviews* 2012;13:469-479.  
28  
29
- 30 [25] Neri L, Iovino P. Bloating is associated with worse quality of life, treatment satisfaction, and treatment  
31  
32 responsiveness among patients with constipation - predominant irritable bowel syndrome and functional  
33  
34 constipation. *Neurogastroenterology and Motility* 2016;28: 581-591.  
35  
36
- 37 [26] Amouretti M, Le Pen C, Gaudin AF, et al. Impact of irritable bowel syndrome (IBS) on health-related  
38  
39 quality of life (HRQOL). *Gastroenterologie clinique et biologique* 2006;30: 241-246.  
40  
41
- 42 [27] Richards MM, D Adams TED, Hunt SC. Functional status and emotional well-being, dietary intake, and  
43  
44 physical activity of severely obese subjects. *Journal of the American dietetic association* 2000;100:67-75.  
45  
46
- 47 [28] Mykletun A, Jacka F, Williams L, et al. Prevalence of mood and anxiety disorder in self-reported irritable  
48  
49 bowel syndrome (IBS). An epidemiological population based study of women. *BMC Gastroenterology* 2010;  
50  
51 10: 88.  
52  
53  
54  
55  
56  
57  
58  
59

1 [29] Demirkan A, Penninx B W J H, Hek K, et al. Genetic risk profiles for depression and anxiety in adult and  
2 elderly cohorts. *Molecular psychiatry* 2011; 16: 773.

3  
4  
5 [30] Lassale C, Péneau S, Touvier M, et al. Validity of web-based self-reported weight and height: results of  
6 the Nutrinet-Santé study. *Journal of Medical Internet Research* 2013;15:e152.

7  
8  
9 [31] Siah KTH, Wong RK, Chan YH, et al. Prevalence of irritable bowel syndrome in Singapore and its  
10 association with dietary, lifestyle, and environmental factors. *Journal of Neurogastroenterology and Motility*  
11 2016;22:670-676.

## 22 23 24 **Footnotes**

25  
26 **CONTRIBUTORS:** Yuanjun Dong, Jonas Tesarz, Rainer Schaefer and Wolfgang Eich designed the study  
27 and wrote the protocol. Yuanjun Dong, Sabrina Berens and Jonas Tesarz performed the literature searches and  
28 analyses. Yuanjun Dong wrote the first draft of the manuscript. All of the authors contributed to and have  
29 approved the final manuscript.

30  
31  
32 **FINANCIAL SUPPORT:** This research received no specific grant from any funding agency in the public,  
33 commercial or not-for-profit sectors.

34  
35  
36 **COMPETING INTERESTS:** The authors have indicated no financial conflicts of interest.

37  
38  
39 **PATIENT CONSENT:** Obtained.

40  
41  
42 **ETHICS APPROVAL:** This study was approved by the Ethics Committee of Heidelberg University  
43 (S-041/2014) and carried out in accordance with the Declaration of Helsinki.

44  
45  
46 **PROVENANCE AND PEER REVIEW:** Not commissioned; externally peer reviewed.

47  
48  
49 **DATA SHARING STATEMENT:** There is no additional unpublished data from this study.

**Tables:**

Table 1. Distribution of BMI at symptom severity and QOL based on several demographic and clinical features (n = 366)

|                         | N   | BMI<br>mean (SD)          | Symptom severity<br>mean (SD) | Quality of life              |                            |
|-------------------------|-----|---------------------------|-------------------------------|------------------------------|----------------------------|
|                         |     |                           |                               | Physical health<br>mean (SD) | Mental health<br>mean (SD) |
| <b>Gender</b>           |     |                           |                               |                              |                            |
| Male                    | 114 | 24.30 (3.48)              | 280.27 (78.23)                | 42.21 (7.87) *               | 39.41 (12.76)              |
| Female                  | 252 | 23.71 (5.84)              | 292.10 (76.14)                | 40.21 (9.16)                 | 39.23 (11.84)              |
| <b>Age</b>              |     |                           |                               |                              |                            |
| 18-49                   | 264 | 23.36 (5.14) *            | 293.39 (77.52) *              | 41.28 (8.21)                 | 38.32 (12.17) *            |
| > 50                    | 102 | 25.29 (5.12)              | 275.55 (74.04)                | 39.69 (10.19)                | 41.80 (11.67)              |
| <b>Family status</b>    |     |                           |                               |                              |                            |
| Single                  | 160 | 22.69 (4.13) #            | 298.15 (71.90)                | 41.42 (7.69)                 | 37.96 (12.09)              |
| Marr <sup>§</sup>       | 164 | 25.19 (5.07)              | 281.94 (82.67)                | 40.58 (9.59)                 | 40.32 (12.18)              |
| Divo <sup>§</sup>       | 37  | 23.50 (5.11)              | 283.11 (69.13)                | 39.45 (10.12)                | 40.87 (11.20)              |
| <b>Education status</b> |     |                           |                               |                              |                            |
| Below Hs <sup>§</sup>   | 97  | 24.62 (6.19)              | 296.31 (71.99)                | 38.40 (9.33) *               | 40.51 (12.35)              |
| Above Hs <sup>§</sup>   | 232 | 23.68 (4.87)              | 286.54 (81.60)                | 42.10 (8.47)                 | 38.60 (12.02)              |
| <b>IBS subtypes</b>     |     |                           |                               |                              |                            |
| IBS-C                   | 37  | 23.38 (5.34)              | 293.13 (82.41)                | 40.76 (9.33)                 | 40.43 (12.30)              |
| IBS-D                   | 151 | 24.69 (5.93) <sup>△</sup> | 293.96 (78.00)                | 40.57 (9.17)                 | 38.74 (12.88)              |
| IBS-M                   | 168 | 23.22 (4.01)              | 283.53 (73.19)                | 41.09 (8.40)                 | 38.98 (11.39)              |

\*  $p < 0.05$ #  $p < 0.05$  for post-hoc comparison between single and Married or unmarried cohabitation

1  $\Delta p < 0.05$  for post-hoc comparison between IBS-D and IBS-M

2 § Marr means “Married or unmarried cohabitation”, Divo means “Divorced or widowed”, Hs means “High  
3 school”  
4

5 IBS-U was not included in the analysis because the sample size is too small.  
6

7 Symptom severity based on IBS-SSS: Mild (IBS-SSS: 75-175), Moderate (IBS-SSS: 175-300) and Severe  
8 (IBS-SSS: > 300).  
9

10 QOL based on SF-36: range from 0 (“highest disability”) to 100 (“no disability”).  
11

12 IBS-C, IBS with constipation; IBS-D, IBS with diarrhea; IBS-M, mixed IBS; BMI, body mass index;  
13  
14  
15  
16  
17  
18  
19  
20  
21  
22  
23  
24  
25  
26  
27  
28  
29  
30  
31  
32  
33  
34  
35  
36  
37  
38  
39  
40  
41  
42  
43  
44  
45  
46  
47  
48  
49  
50  
51  
52  
53  
54  
55  
56  
57  
58  
59  
60

Table 2. Correlation Matrix for the Study Variables in IBS patients

|                  | BMI      | Age     | Symptom severity | Physical Health | Mental health |
|------------------|----------|---------|------------------|-----------------|---------------|
| BMI              | 1.00     |         |                  |                 |               |
| Age              | 0.173**  | 1.00    |                  |                 |               |
| Symptom severity | 0.055    | -0.129* | 1.00             |                 |               |
| Physical Health  | -0.177** | -0.085  | -0.349**         | 1.00            |               |
| Mental health    | 0.033    | 0.167** | -0.268**         | 0.029           | 1.00          |

\*  $p < 0.05$

\*\*  $p < 0.01$

BMI, Body mass index;

Table 3. Results of hierarchical multiple regression relating physical health and mental health to symptom severity and BMI

|                                       | Model 1 |         | Model 2 |          | Model 3 |          | Model summary |         |            |              |
|---------------------------------------|---------|---------|---------|----------|---------|----------|---------------|---------|------------|--------------|
|                                       | $\beta$ | $t$     | $\beta$ | $t$      | $\beta$ | $t$      | $F$           | $R^2$   | $\Delta F$ | $\Delta R^2$ |
| <b>physical health</b>                |         |         |         |          |         |          |               |         |            |              |
| Age                                   | -0.048  | -0.679  | -0.092  | -1.392   | -0.081  | -1.224   | 2.448*        | 0.051*  | -          | -            |
| Gender                                | -0.100  | -1.820  | -0.080  | -1.574   | -0.091  | -1.781   |               |         |            |              |
| Single & Marr <sup>§</sup>            | 0.008   | 0.105   | 0.026   | 0.394    | 0.000   | 0.006    |               |         |            |              |
| Divo <sup>§</sup> & Marr <sup>§</sup> | 0.000   | -0.002  | 0.005   | 0.084    | -0.010  | -0.190   |               |         |            |              |
| Education                             | 0.177   | 3.152** | 0.152   | 2.918**  | 0.144   | 2.784**  |               |         |            |              |
| IBS-C & IBS-D                         | 0.026   | 0.453   | -0.010  | -0.185   | -0.022  | -0.416   |               |         |            |              |
| IBS-M & IBS-D                         | 0.026   | 0.460   | 0.023   | 0.425    | 0.017   | 0.323    |               |         |            |              |
| symptom severity                      | -       | -       | -0.376  | -7.300** | -0.365  | -7.124** | 9.156**       | 0.188** | 53.283**   | 0.137**      |
| BMI                                   | -       | -       | -       | -        | -0.135  | -2.565*  | 9.013**       | 0.205** | 6.581*     | 0.017*       |
| <b>mental health</b>                  |         |         |         |          |         |          |               |         |            |              |
| Age                                   | 0.173   | 2.393*  | 0.140   | 2.009*   | 0.139   | 1.985*   | 1.309         | 0.028   | -          | -            |
| Gender                                | -0.018  | -0.323  | -0.003  | -0.061   | -0.002  | -0.042   |               |         |            |              |
| Single & Marr <sup>§</sup>            | 0.026   | 0.356   | 0.040   | 0.569    | 0.042   | 0.598    |               |         |            |              |
| Divo <sup>§</sup> & Marr <sup>§</sup> | -0.031  | -0.523  | -0.028  | -0.483   | -0.026  | -0.454   |               |         |            |              |
| Education                             | -0.060  | -1.053  | -0.078  | -1.429   | -0.077  | -1.410   |               |         |            |              |
| IBS-C & IBS-D                         | 0.008   | 0.129   | -0.019  | -0.341   | -0.018  | -0.318   |               |         |            |              |
| IBS-M & IBS-D                         | 0.011   | 0.191   | 0.008   | 0.147    | 0.009   | 0.157    |               |         |            |              |
| symptom severity                      | -       | -       | -0.280  | -5.164** | -0.281  | -5.159** | 4.572**       | 0.104** | 26.671**   | 0.076**      |
| BMI                                   | -       | -       | -       | -        | 0.013   | 0.239    | 4.058**       | 0.104** | 0.057      | 0.000        |

\*  $p < 0.05$

\*\*  $p < 0.01$

Model 1 predictors: age, gender, family status, education status, IBS subtypes;

Model 2 predictors: age, gender, family status, education status, IBS subtypes, symptom severity;

Model 3 predictors: age, gender, family status, education status, IBS subtypes, symptom severity, BMI.

§ Marr means “Married or unmarried cohabitation”, Divo means “Divorced or widowed

IBS-U was not included in the analysis because the sample size is too small.

IBS-C, IBS with constipation; IBS-D, IBS with diarrhea; IBS-M, mixed IBS; BMI, body mass index

1  
2  
3  
4  
5  
6  
7  
8  
9  
10  
11  
12  
13  
14  
15  
16  
17  
18  
19  
20  
21  
22  
23  
24  
25  
26  
27  
28  
29  
30  
31  
32  
33  
34  
35  
36  
37  
38  
39  
40  
41  
42  
43  
44  
45  
46  
47  
48  
49  
50  
51  
52  
53  
54  
55  
56  
57  
58  
59  
60

For peer review only



STROBE Statement—Checklist of items that should be included in reports of *cross-sectional studies*

|                              | Item No | Recommendation                                                                                                                                                                                                                                                                                                                                                                                                                    |
|------------------------------|---------|-----------------------------------------------------------------------------------------------------------------------------------------------------------------------------------------------------------------------------------------------------------------------------------------------------------------------------------------------------------------------------------------------------------------------------------|
| <b>Title and abstract</b>    | 1       | (a) Indicate the study's design with a commonly used term in the title or the abstract <b>【Page 1】</b><br>(b) Provide in the abstract an informative and balanced summary of what was done and what was found <b>【Pages 2 - 3】</b>                                                                                                                                                                                                |
| <b>Introduction</b>          |         |                                                                                                                                                                                                                                                                                                                                                                                                                                   |
| Background/rationale         | 2       | Explain the scientific background and rationale for the investigation being reported <b>【Pages 4】</b>                                                                                                                                                                                                                                                                                                                             |
| Objectives                   | 3       | State specific objectives, including any prespecified hypotheses <b>【Pages 4】</b>                                                                                                                                                                                                                                                                                                                                                 |
| <b>Methods</b>               |         |                                                                                                                                                                                                                                                                                                                                                                                                                                   |
| Study design                 | 4       | Present key elements of study design early in the paper <b>【Pages 5 - 7】</b>                                                                                                                                                                                                                                                                                                                                                      |
| Setting                      | 5       | Describe the setting, locations, and relevant dates, including periods of recruitment, exposure, follow-up, and data collection <b>【Page 5 - 7】</b>                                                                                                                                                                                                                                                                               |
| Participants                 | 6       | (a) Give the eligibility criteria, and the sources and methods of selection of participants <b>【Page 5】</b>                                                                                                                                                                                                                                                                                                                       |
| Variables                    | 7       | Clearly define all outcomes, exposures, predictors, potential confounders, and effect modifiers. Give diagnostic criteria, if applicable <b>【Pages 6 - 7】</b>                                                                                                                                                                                                                                                                     |
| Data sources/<br>measurement | 8*      | For each variable of interest, give sources of data and details of methods of assessment (measurement). Describe comparability of assessment methods if there is more than one group <b>【Pages 6 - 7】</b>                                                                                                                                                                                                                         |
| Bias                         | 9       | Describe any efforts to address potential sources of bias <b>【Page 5】</b>                                                                                                                                                                                                                                                                                                                                                         |
| Study size                   | 10      | Explain how the study size was arrived at <b>【Page 5】</b>                                                                                                                                                                                                                                                                                                                                                                         |
| Quantitative variables       | 11      | Explain how quantitative variables were handled in the analyses. If applicable, describe which groupings were chosen and why <b>【Pages 6 - 7】</b>                                                                                                                                                                                                                                                                                 |
| Statistical methods          | 12      | (a) Describe all statistical methods, including those used to control for confounding <b>【Pages 6 - 7】</b><br>(b) Describe any methods used to examine subgroups and interactions <b>【Page 6 - 7】</b><br>(c) Explain how missing data were addressed <b>【Page 6 - 7】</b><br>(d) If applicable, describe analytical methods taking account of sampling strategy <b>【N/A】</b><br>(e) Describe any sensitivity analyses <b>【N/A】</b> |
| <b>Results</b>               |         |                                                                                                                                                                                                                                                                                                                                                                                                                                   |
| Participants                 | 13*     | (a) Report numbers of individuals at each stage of study—eg numbers potentially eligible, examined for eligibility, confirmed eligible, included in the study, completing follow-up, and analysed <b>【Page 7 - 8; table 1】</b><br>(b) Give reasons for non-participation at each stage <b>【N/A】</b><br>(c) Consider use of a flow diagram <b>【N/A】</b>                                                                            |
| Descriptive data             | 14*     | (a) Give characteristics of study participants (eg demographic, clinical, social) and information on exposures and potential confounders <b>【Pages 7 - 9】</b><br>(b) Indicate number of participants with missing data for each variable of interest <b>【Page 7; table 1】</b>                                                                                                                                                     |
| Outcome data                 | 15*     | Report numbers of outcome events or summary measures <b>【Pages 7 - 9, table 1-3】</b>                                                                                                                                                                                                                                                                                                                                              |
| Main results                 | 16      | (a) Give unadjusted estimates and, if applicable, confounder-adjusted estimates and their precision (eg, 95% confidence interval). Make clear which confounders were adjusted for and why they were included <b>【Pages 7 - 9; table 1 - 3】</b>                                                                                                                                                                                    |

|                          |    |                                                                                                                                                                                                  |
|--------------------------|----|--------------------------------------------------------------------------------------------------------------------------------------------------------------------------------------------------|
|                          |    | (b) Report category boundaries when continuous variables were categorized <b>【N/A】</b>                                                                                                           |
|                          |    | (c) If relevant, consider translating estimates of relative risk into absolute risk for a meaningful time period <b>【N/A】</b>                                                                    |
| Other analyses           | 17 | Report other analyses done—eg analyses of subgroups and interactions, and sensitivity analyses <b>【N/A】</b>                                                                                      |
| <b>Discussion</b>        |    |                                                                                                                                                                                                  |
| Key results              | 18 | Summarise key results with reference to study objectives <b>【Page 9 - 11】</b>                                                                                                                    |
| Limitations              | 19 | Discuss limitations of the study, taking into account sources of potential bias or imprecision. Discuss both direction and magnitude of any potential bias <b>【Page 11】</b>                      |
| Interpretation           | 20 | Give a cautious overall interpretation of results considering objectives, limitations, multiplicity of analyses, results from similar studies, and other relevant evidence <b>【Pages 9 - 12】</b> |
| Generalisability         | 21 | Discuss the generalisability (external validity) of the study results <b>【Pages 9 - 12】</b>                                                                                                      |
| <b>Other information</b> |    |                                                                                                                                                                                                  |
| Funding                  | 22 | Give the source of funding and the role of the funders for the present study and, if applicable, for the original study on which the present article is based <b>【Page 15】</b>                   |

\*Give information separately for exposed and unexposed groups.

**Note:** An Explanation and Elaboration article discusses each checklist item and gives methodological background and published examples of transparent reporting. The STROBE checklist is best used in conjunction with this article (freely available on the Web sites of PLoS Medicine at <http://www.plosmedicine.org/>, Annals of Internal Medicine at <http://www.annals.org/>, and Epidemiology at <http://www.epidem.com/>). Information on the STROBE Initiative is available at [www.strobe-statement.org](http://www.strobe-statement.org).

# BMJ Open

## Symptom severity and health-related quality of life in patients with irritable bowel syndrome: The role of body mass index

|                                 |                                                                                                                                                                                                                                                                                                                                                                                                                              |
|---------------------------------|------------------------------------------------------------------------------------------------------------------------------------------------------------------------------------------------------------------------------------------------------------------------------------------------------------------------------------------------------------------------------------------------------------------------------|
| Journal:                        | <i>BMJ Open</i>                                                                                                                                                                                                                                                                                                                                                                                                              |
| Manuscript ID                   | bmjopen-2017-019453.R3                                                                                                                                                                                                                                                                                                                                                                                                       |
| Article Type:                   | Research                                                                                                                                                                                                                                                                                                                                                                                                                     |
| Date Submitted by the Author:   | 30-May-2018                                                                                                                                                                                                                                                                                                                                                                                                                  |
| Complete List of Authors:       | Dong, Yuanjun; Universitätsklinikum Heidelberg Medizinische Klinik, Clinic for General Internal Medizin and Psychosomatics<br>Berens, Sabrina; Universitätsklinikum Heidelberg Medizinische Klinik<br>Eich, Wolfgang; Universitätsklinikum Heidelberg Medizinische Klinik<br>Schaefer, Rainer; University Hospital Basel, Department of Psychosomatics<br>Tesarz, Jonas; Universitätsklinikum Heidelberg Medizinische Klinik |
| <b>Primary Subject Heading</b>: | Gastroenterology and hepatology                                                                                                                                                                                                                                                                                                                                                                                              |
| Secondary Subject Heading:      | Nutrition and metabolism, Mental health                                                                                                                                                                                                                                                                                                                                                                                      |
| Keywords:                       | Irritable bowel syndrome, Body mass index, Symptom severity, Quality of life                                                                                                                                                                                                                                                                                                                                                 |
|                                 |                                                                                                                                                                                                                                                                                                                                                                                                                              |

SCHOLARONE™  
Manuscripts

Only

**Original Article****Symptom severity and health-related quality of life in patients with irritable bowel syndrome: The role of body mass index**

Yuanjun Dong<sup>1</sup>, M.M., Sabrina Berens<sup>1</sup>, M.Sc., Wolfgang Eich<sup>1</sup>, M.D., PhD., Rainer Schaefer<sup>2</sup>, M.D., PhD.,  
Jonas Tesarz<sup>1,\*</sup>, M.D. PhD.

<sup>1</sup> **Department of General Internal Medicine and Psychosomatics, University Hospital Heidelberg, Im Neuenheimer Feld 410, 69120 Heidelberg, Germany**

<sup>2</sup> **Department of Psychosomatics, Division of Internal Medicine, University Hospital Basel, University of Basel, Hebelstrasse 2, CH-4031 Basel, Switzerland**

**\* Corresponding Author.**

**Address correspondence to:** Jonas Tesarz, Department of General Internal Medicine and Psychosomatics, University Hospital Heidelberg, Im Neuenheimer Feld 410, 69120 Heidelberg, Germany. Tel: 0049 /6221/56-37862, E-mail: *Jonas.Tesarz@med.uni-heidelberg.de*

## Abstract

### Objective

The aim of this study was to describe the body mass index (BMI) distribution in patients with irritable bowel syndrome (IBS) based on the Rome III criteria, and to evaluate the association of BMI with symptom severity and quality of life (QOL).

### Methods

A cross-sectional study was carried out in patients visiting our outpatient Functional Gastrointestinal Disorders specialty clinic. IBS diagnosis was made based on Rome III criteria. IBS symptom severity was investigated using the IBS severity score system (IBS-SSS). QOL was assessed using the Short-Form-36-Health-Survey (SF-36), which consists of physical health and mental health.

### Results

366 patients (252 females) who fulfilled Rome III criteria and provided complete BMI data ( $23.90 \pm 5.22$  kg/m<sup>2</sup>) were included. Overall, 59.0% of patients with IBS were in the normal weight range, 30.3% were overweight or obese, and 10.7% were underweight. Both physical and mental health decreased significantly with the severity of symptoms (all  $p < 0.01$ ), whilst controlling for several covariates (age, gender, family status, education status and IBS subtypes). Obesity and symptom severity ( $\beta = -0.177$ ,  $\Delta R^2 = 0.037$ ,  $p < 0.01$ ;  $\beta = -0.387$ ,  $\Delta R^2 = 0.147$ ,  $p < 0.01$ ) were significant negative factors that influencing physical health. Symptom severity ( $\beta = -0.301$ ,  $\Delta R^2 = 0.084$ ,  $p < 0.01$ ) was significant negative factor that influencing mental health. However, BMI didn't account for additional variance in mental health ( $p > 0.05$ ).

### Conclusion

Being overweight is a common phenomenon in patients with IBS regardless of IBS subtype. The association between QOL and symptom severity followed a negative dose response pattern. Patients with

1 higher BMI, especially obese patients, were more frequently in poor physical health. However, this kind of  
2  
3 relationship was not found in BMI and mental health.  
4

5  
6 **Keywords:**

7  
8 Irritable bowel syndrome; Body mass index; Symptom severity; Quality of life  
9

10  
11  
12  
13  
14  
15  
16 **Strengths and limitations of this study:**

- 17  
18 1) This study uses a large and well described patient cohort with a validated diagnosis of IBS based on the  
19 Rome III criteria;  
20  
21 2) The association between QOL and symptom severity followed a negative dose response pattern;  
22  
23 3) Patients with higher BMI were more frequently in poor physical health. However, this kind of relationship  
24 was not found in BMI and mental health of QOL.  
25  
26 4) The study was cross-sectional, therefore it is not possible to infer causation;  
27  
28 5) BMI cannot fully reflect the impact of the factors of fatty mass, dietary habit, other lifestyle factors such as  
29 physical exercise on IBS.  
30  
31  
32  
33  
34  
35  
36  
37  
38  
39  
40  
41  
42  
43  
44  
45  
46  
47  
48  
49  
50  
51  
52  
53  
54  
55  
56  
57  
58  
59  
60

## 1 Introduction

Irritable bowel syndrome (IBS) is a chronic and common functional bowel disorder that is characterized by recurrent abdominal pain or discomfort associated with altered bowel habits [1]. According to the Rome III criteria, IBS is classified into four subtypes [IBS with diarrhoea (IBS-D), IBS with constipation (IBS-C), mixed IBS (IBS-M) and un-subtyped IBS (IBS-U)] based on the predominant abdominal symptomatology [1]. It has been frequently reported that IBS leads to impaired quality of life (QOL) [2-4]. The symptoms of IBS are associated with different eating habits [5]. In a recent randomized controlled trial, a diet low in Fermentable Oligo-, Di-, Mono-saccharides And Polyols (FODMAPs) was shown to improve the IBS-D patients' QOL, anxiety, and activity impairment [6].

Epidemiologic studies have shown that as many as 16.5% of adults in European countries are obese [body mass index (BMI) > 30 kg/m<sup>2</sup>] [7] and that the incidence of obesity is increasing [8]. Additionally, a cross-sectional multicentre study found that more than 63% of outpatients and 80% of inpatients in gastroenterological centres suffered from significant changes in body composition [9]. In addition, underweight (BMI < 18.5 kg/m<sup>2</sup>) or obese body condition (BMI > 30 kg/m<sup>2</sup>) are both associated with multiple abdominal symptoms leading to reduced QOL [10, 11]. Although extensive research has been carried out on the prevalence of obesity in the general population and in connection with numerous diseases, there is only little published data on the prevalence and clinical relevance of nutritional status and body mass in patients with IBS. Locke *et al.* [12] found no association between IBS status and BMI. However, this study was a population-based study. Studies with large enough sample size based on clinic patients are missing so far.

Therefore, the aim of this study was to describe the BMI distribution in patients with IBS based on the Rome III criteria, and to evaluate the association of BMI with symptom severity and the physical health and mental health of QOL.

## 2 Methods

This cross-sectional survey included patients evaluated at the Functional Gastrointestinal Disorders (FGIDs) specialty clinic of the Department of General Internal Medicine and Psychosomatics of Heidelberg University Hospital, which is a tertiary care facility. All patients who completed our routine baseline documentation were enrolled. The routine data from individual health records was transferred into the database and pseudonymized. This study was approved by the Ethics Committee of Heidelberg University (S-041/2014) and carried out in accordance with the Declaration of Helsinki.

### 2.1 Patients recruitment

From 01/2011 to 12/2016, patients' clinical data were consecutively collected from our outpatient FGIDs clinic at Heidelberg University Hospital for this explorative and descriptive study. All patients  $\geq 18$  years of age were included, if they fulfilled the Rome III criteria for the diagnosis of IBS [1]. The subtype criteria for IBS were based on stool consistency as assessed by the Bristol Stool Scale (BSS) and Rome III criteria [13]. Demographic data including gender, age, family status, level of education and residence, was also collected at baseline using the Psychosomatic Basis Documentation Questionnaire (Psy-BaDo) [14].

### 2.2 Patient Involvement

No patients were involved in conducting the study. However, in order to increase the clinical relevance of the study, we established an advisory group to advise the research project.

### 2.3 Measurement of IBS symptom severity

Patients rated the severity of their IBS symptoms by completing the IBS severity score system (IBS-SSS) [15]. The IBS-SSS has a maximum score of 500 and comprises five items: frequency and intensity of



1 abdominal pain, severity of abdominal distension, dissatisfaction with bowel habits, and interference of IBS  
2  
3 with daily life. Based on validated cut-off values, three IBS severity subgroups can be distinguished: Mild  
4  
5 (IBS-SSS: 75-175), Moderate (IBS-SSS: 175-300) and Severe (IBS-SSS: > 300). The German version of this  
6  
7 questionnaire was validated by Betz *et al.* [16] and the total score was computed in accordance with the  
8  
9 manual.  
10  
11  
12  
13  
14  
15

## 16 **2.4 Measurement of BMI**

17  
18 BMI was calculated as the individual's self-reported body weight (kg) divided by the square of their  
19  
20 height (m). BMI was categorized according to the World Health Organization (WHO) classification of  
21  
22 physical status [17]: underweight (BMI < 18.5 kg/m<sup>2</sup>), normal weight (BMI 18.5–25 kg/m<sup>2</sup>), overweight (25–  
23  
24 30 kg/m<sup>2</sup>), or obese body condition (BMI > 30 kg/m<sup>2</sup>).  
25  
26  
27  
28  
29  
30

## 31 **2.5 Measurement of quality of life**

32  
33  
34 Quality of life was measured using the Short Form 36 Health Survey (SF-36) [18]. SF-36 is a 36-item,  
35  
36 patient-reported survey of patient quality of life, which consists of a physical health index and mental health  
37  
38 index. The SF-36 is widely used and well validated for assessing generic health outcomes. Each scale is  
39  
40 directly transformed into a 0-100 scale. Lower scores represent a higher degree of disability. Validation of the  
41  
42 German version was performed by Morfeld *et al.* [19].  
43  
44  
45  
46  
47  
48

## 49 **2.6 Statistical analysis**

50  
51  
52 Routine data were transformed into an SPSS file and evaluated using the statistical program SPSS (IBM,  
53  
54 version 22.0). Descriptive statistics are presented as the means and standard deviation (*SD*) for continuous  
55  
56 variables and as absolute numbers and percentages for categorical variables. All analyses were explorative  
57  
58  
59  
60

1 and not of a confirmatory nature. All primary and secondary variables were first tested for normal distribution.  
2  
3 For normally distributed variables, the mean and standard deviation were calculated. Variables that lacked a  
4  
5 normal distribution were reported using the median and interquartile range. The Mann-Whitney U Test was  
6  
7 used to assess the level of significance because a number of participants differed between the groups.  
8  
9  
10 Comparison of socio-demographical and anthropometric data according to BMI was performed using analysis  
11  
12 of variance (ANOVA) and nonparametric tests in the first instance. Where significant group differences were  
13  
14 detected based on ANOVA, post-hoc least significant difference tests were conducted to compare the study  
15  
16 groups in a pairwise fashion. We also used the Pearson correlation coefficients to investigate the linear  
17  
18 association between demographics, BMI, clinical and psychological features. Hierarchical multiple regression  
19  
20 was used to help understand the impact of potential confounders as well as the predictive role of BMI in  
21  
22 physical health and mental health of QOL. We tested the impact of the confounders (gender, age, family  
23  
24 status, education status and IBS subtypes) in Model 1. In model 2, we added the symptom severity. BMI  
25  
26 categories (underweight, normal weight, overweight and obesity) were added in model 3. All tests were  
27  
28 two-sided and statistical significance was accepted if  $p < 0.05$ .  
29  
30  
31  
32  
33  
34  
35  
36  
37  
38

### 39 **3 Results**

#### 40 **3.1 Characteristics of study sample**

41  
42 A total of 576 patients completed the questionnaire. Excluding 113 patients whose Rome III criteria data  
43  
44 were partly missing, 366 patients with IBS were enrolled in this study (114 males, 252 females; mean BMI  
45  
46  $23.90 \pm 5.22$  kg/m<sup>2</sup>). The demographic and baseline characteristics of the patients with IBS among the  
47  
48 different subtypes are summarized in Table 1. Of the included subjects, the most frequent IBS subtype was  
49  
50 IBS-M (45.9%), followed by IBS-D (41.3%), and IBS-C (10.1%). Only 59.0% of patients with IBS were  
51  
52 within the normal weight range, whereas 30.3% were overweight or obese, and only a minority were  
53  
54  
55  
56  
57  
58  
59  
60

1 underweight (10.7%). The percentage of obese patients was highest in IBS-D (17.9%,  $p < 0.01$ ). Taking  
2  
3 gender into account, 5.3% of males and 13.1% of females were underweight. Additionally, 7.0% of males and  
4  
5 13.1% of females were obese and 26.3% of males and 15.9% of females were overweight. Overall, patients  
6  
7 reported moderate to severe IBS symptom severity (IBS-SSS range: 125 - 484) and lower QOL (physical  
8  
9 health range of SF-36: 15.19 – 64.00, mental health range of SF-36: 7.89 – 65.85).  
10  
11  
12  
13  
14  
15

### 16 **3.2 Correlations between BMI, symptom severity and QOL**

17  
18 Pearson product-moment correlations indicated that high BMI values and elevated symptom severity  
19  
20 were associated with poorer QOL. As shown in Table 2, BMI was negatively correlated with physical health ( $r$   
21  
22 = -0.177,  $p < 0.01$ ). Symptom severity was negatively correlated with physical health ( $r = -0.394$ ,  $p < 0.01$ )  
23  
24 and mental health ( $r = -0.268$ ,  $p < 0.01$ ). Additionally, age was negatively correlated with symptom severity ( $r$   
25  
26 = -0.129,  $p < 0.05$ ) and positively correlated with physical health ( $r = 0.167$ ,  $p < 0.01$ ).  
27  
28  
29  
30  
31  
32  
33

### 34 **3.3 Characteristics of BMI, symptom severity and QOL Across Demographic and IBS subtypes**

35  
36 As shown in Table 1, male reported significantly higher physical health problems than female ( $t = 2.141$ ,  
37  
38  $p < 0.05$ ). Compared to older patients (age > 50), the younger patients (age 18 - 49) reported significantly  
39  
40 lower BMI level ( $t = -3.20$ ,  $p < 0.01$ ), greater symptom severity ( $t = 2.039$ ,  $p < 0.05$ ) and worse mental health  
41  
42 ( $t = -2.528$ ,  $p < 0.05$ ). Patients living with a stable partner (married or unmarried cohabitation) had higher BMI  
43  
44 compared to single participants ( $t = -4.397$ ,  $p < 0.01$ ). The patients with below high school education reported  
45  
46 significantly higher physical health problems than those who with above high school education ( $t = -3.376$ ,  $p <$   
47  
48  $0.01$ ). Compared with IBS-M patients, the IBS-D patients reported significantly higher BMI level ( $t = -2.572$ ,  
49  
50  $p < 0.05$ ).  
51  
52  
53  
54  
55  
56  
57  
58  
59  
60

### 3.4 the influences of BMI in physical health and mental health of QOL

As shown in Table 3, the hierarchical multiple regression examined the relationship between dependent variable (physical health) and independent variables (symptom severity and BMI). Model 1 was significant ( $F = 2.252, p < 0.05$ ) and explained 5.2% of the variance in physical health. Education status ( $\beta = 0.174, p < 0.01$ ) was a significant positive factor that influencing physical health. In model 2, symptom severity significantly added to the amount of explained variance ( $\Delta R^2 = 0.147, \Delta F = 52.498, p < 0.01$ ). In model 3, BMI also significantly added to the amount of explained variance ( $\Delta R^2 = 0.037, \Delta F = 4.605, p < 0.01$ ). Obesity ( $\beta = -0.177, p < 0.01$ ) was a significant negative factor that influencing physical health. Similarly, when mental health was used as the dependent variable, Model 1 was insignificant ( $F = 0.854, p > 0.05$ ). In model 2, symptom severity significantly increased the amount of explained variance ( $\Delta R^2 = 0.084, \Delta F = 26.824, p < 0.01$ ). In model 3, BMI didn't account for an additional significant amount of variance in mental health ( $\Delta R^2 = 0.007, \Delta F = 0.772, p > 0.05$ ).

## 4 Discussion

This study sought to describe the BMI distribution in patients with IBS based on the Rome III criteria, and to evaluate the association of BMI with symptom severity and the physical health and mental health of QOL. Therefore, we used standardized questionnaires and medical records to confirm the diagnosis and to assess patient symptoms and quality of life.

Our data show that being overweight is a common phenomenon in patients with IBS regardless of IBS subtype. These findings are in agreement with the results of a previous study based on obese patients in France, which found that 30.0% of obese patients had IBS [20]. We found that almost 40% of patients with IBS were not in the normal weight range, which is consistent with previous results [21]. Notably, the overweight and obesity rates in the general adult population in Germany [7] are higher than those found in our

1 IBS cohort. According to the German Health Update (GEDA) [7], in 2012 the overweight rate of adults was  
2  
3 36.2% and the obesity rate was 16.5%. Interestingly, the distribution of weight was similar between the  
4  
5 different IBS groups. In particular, there was no difference between IBS-C and IBS-M. Notably, in IBS-D the  
6  
7 percentage of obese patients reached 17.9%. Lee *et al.* [22] evaluated the relationship between visceral  
8  
9 adipose tissue and the risk of IBS and suggested that disturbances of visceral fat may be more common in  
10  
11 IBS-D patients. In addition, another Korean study found increased intestinal permeability in IBS-D patients  
12  
13 [23]. One possible explanation is that the increase in visceral fat leads to an increase in intestinal osmolality  
14  
15 [24] and then leads to the chronic diarrhea. These studies, however, were confined to patients from South  
16  
17  
18  
19  
20  
21 Korea.

22  
23  
24 IBS has a significant impact on patients' QOL [25]. Our data show an association between symptom  
25  
26 severity and QOL with regard to physical and mental health. The patients in our study reported moderate to  
27  
28 severe IBS symptom severity and lower QOL. Further, this association followed a negative dose response  
29  
30 pattern. Our findings partially match those of Amouretti *et al.* [26], who found that IBS patients who reported  
31  
32 their symptoms as severe or very severe had a very poor QoL compared with those who reported their  
33  
34 symptoms as moderate. However, their study did not distinguish between physical and mental health and did  
35  
36 not consider the effects of confounding factors such as BMI. This is an interesting but not completely new  
37  
38 result which gives rise to the question of what mechanisms are responsible for this association.  
39  
40  
41  
42  
43

44 Through the hierarchical multiple regression, we tested the relationship between dependent variable  
45  
46 (QOL) and independent variables (symptom severity and BMI). We controlled for the impact of the  
47  
48 confounders (gender, age, family status, education status and IBS subtypes). The correlation between  
49  
50 symptom severity and QOL was significantly negative, no matter which BMI category was. Our findings  
51  
52 show that obesity was significant negative predictor of physical health. Patients with higher BMI were more  
53  
54 frequently in poor physical health. This is in line with previous studies [11], in that increasing BMI is  
55  
56  
57  
58  
59

1 associated with increased upper gastrointestinal symptoms, bloating, and diarrhoea. Obesity may lead to more  
2  
3 physiological stress on organs. Richards *et al.* [27] reported that obese patients have more severe pain and are  
4  
5 to a larger extent restricted in their daily functioning compared to patients of normal weight. An additional  
6  
7 finding of our study was that BMI didn't account for an additional significant amount of variance in mental  
8  
9 health. This was inconsistent with findings by Mykletun [28], who found that BMI had significant association  
10  
11 with IBS with regard to anxiety and mood disorders. However, their study evaluated only female patients. The  
12  
13 findings of genome-wide association studies, from the genetic perspective, suggest the presence of many  
14  
15 genetic loci each with a small effect influencing susceptibility to mental health symptoms (depression and  
16  
17 anxiety) [29]. We can therefore hypothesise that, the unpredictable association between risk of mental health  
18  
19 and BMI in our study may be due to non-modifiable genetic influences which predispose individuals to bad  
20  
21 mental health.  
22  
23  
24  
25  
26  
27  
28

29 Several limitations of this study must be taken into account. First, the study was cross-sectional,  
30  
31 therefore, it is impossible to infer causation. Second, BMI was based on the self-reported height and weight of  
32  
33 patients and computed without objective measurement, therefore bias may have been introduced. Patients may  
34  
35 occasionally underreport or overreport their weight and height leading to an underestimation of underweight  
36  
37 or obese patients. However, in the Nutrinet-Santé study, researchers reported that deviations in self-reported  
38  
39 BMIs from questionnaires can be ignored because their results confirmed the validity and agreement of  
40  
41 self-reported data with measured data [30, 31]. The choice of SF-36 as the only QOL tool may partly miss the  
42  
43 relationship between symptom severity and QOL. Moreover, BMI is associated with a multitude of different  
44  
45 factors, such as genetics, fatty mass, dietary habit or physical exercise. Thus, BMI cannot fully reflect the  
46  
47 impact of those factors on IBS in more details and more research is needed. The strengths of this study,  
48  
49 however are the use of a large patient cohort with a validated diagnosis of IBS based on the Rome III criteria.  
50  
51  
52  
53  
54  
55  
56  
57  
58  
59  
60

1 To conclude, being overweight is a common phenomenon in IBS patients regardless of IBS subtypes.  
2  
3 Our data further suggest that overweight and obesity may have a relevant influence on QOL. Patients with  
4  
5 higher BMI were more frequently in poor physical health. The findings have some implications for future  
6  
7 practice. Clinical doctors should pay special attention to abnormal weight in IBS patients as this maybe an  
8  
9 indicator of a poorer QOL, especially with regard to the physical health.  
10  
11  
12  
13  
14  
15  
16  
17

### 18 **References:**

- 20  
21 [1] Drossman DA. The functional gastrointestinal disorders and the Rome III process. *Gastroenterology*  
22  
23 2006;130:1377-1390.  
24  
25  
26 [2] Lacy, Brian E. Perspective: An easier diagnosis. *Nature* 2016;533.7603: S107-S107.  
27  
28  
29 [3] Ljótsson B, Hesser H, Andersson E, et al. Provoking symptoms to relieve symptoms: a randomized  
30  
31 controlled dismantling study of exposure therapy in irritable bowel syndrome. *Behaviour Research and*  
32  
33 *Therapy* 2014;55:27-39.  
34  
35  
36 [4] Hoekman, Daniël R, et al. Annual Costs of Care for Pediatric Irritable Bowel Syndrome, Functional  
37  
38 Abdominal Pain, and Functional Abdominal Pain Syndrome. *The Journal of Pediatrics*  
39  
40 2015;167.5:1103-1108.  
41  
42  
43  
44 [5] Hayes P, Corish C, O'mahony E, Quigley EMM. A dietary survey of patients with irritable bowel  
45  
46 syndrome. *Journal of human nutrition and dietetics* 2014; 27(s2): 36-47  
47  
48  
49 [6] Eswaran S, Chey WD, Jackson K, et al. A Diet Low in Fermentable Oligo-, Di-, and Monosaccharides and  
50  
51 Polyols Improves Quality of Life and Reduces Activity Impairment in Patients with Irritable Bowel Syndrome  
52  
53 and Diarrhea. *Clinical Gastroenterology and Hepatology* 2017; 15:1817-1819.  
54  
55  
56  
57  
58  
59

- [7] Lange C, Jentsch F, Allen J, et al. Data Resource Profile: German Health Update (GEDA)—the health interview survey for adults in Germany. *International journal of epidemiology* 2015; 44: 442-450.
- [8] Gracey M, King M. Indigenous health part 1: determinants and disease patterns. *The Lancet* 2009;374:65-75.
- [9] Rizzi M, Mazzuoli S, Regano N, et al. Undernutrition, risk of malnutrition and obesity in gastroenterological patients: A multicenter study. *World journal of gastrointestinal oncology* 2016; 8: 563.
- [10] van Oijen MG, Josemanders DF, Laheij RJ, van Rossum LG, Tan AC, Jansen JB. Gastrointestinal disorders and symptoms: does body mass index matter? *The Netherlands Journal of Medicine* 2006;64:45–49.
- [11] Talley NJ, Howell S, Poulton R. Obesity and chronic gastrointestinal tract symptoms in young adults: a birth cohort study. *The American Journal of Gastroenterology* 2004;99:1807–1814.
- [12] Locke GR, Zinsmeister AR, Schleck CD, et al. Psychosocial distress and somatic symptoms in community subjects with irritable bowel syndrome: a psychological component is the rule. *The American Journal of Gastroenterology* 2009;104:1772-1779.
- [13] Heaton KW, Gosh S. Relation between stool form on a seven point scale and symptoms of urgency, straining, and incomplete evacuation. *Gut* 1989;30:A1465-A1465.
- [14] Heuft G. Praxis der Qualitätssicherung in der Psychotherapie: das Manual zur Psy-BaDo;[entsprechend den Empfehlungen der psychotherapeutischen Fachgesellschaften]. *Thieme* 1998.
- [15] Kaptchuk TJ, Friedlander E, Kelley JM, et al. Placebos without deception: a randomized controlled trial in irritable bowel syndrome. *PloS One* 2010;5: e15591.
- [16] Betz C, Mannsdoerfer K, Bischoff SC. Validation of the IBS-SSS. *Zeitschrift für Gastroenterologie* 2013;51:1171-1176.
- [17] World Health Organization. Physical status: The use of and interpretation of anthropometry, Report of a WHO Expert Committee 1995.



- 1 [18] Jenkinson C, Coulter A, Wright L. Short form 36 (SF36) health survey questionnaire: normative data for  
2 adults of working age. *BMJ* 1993;306:1437-1440.
- 3  
4  
5 [19] Morfeld M, Kirchberger I, Bullinger M. SF-36 Fragebogen zum Gesundheitszustand: Deutsche Version  
6 des Short Form-36 Health Survey. *Hogrefe* 2011.
- 7  
8  
9  
10 [20] Schneck AS, Anty R, Tran A, et al. Increased Prevalence of Irritable Bowel Syndrome in a Cohort of  
11 French Morbidly Obese Patients Candidate for Bariatric Surgery. *Obesity surgery* 2016; 26: 1525-1530.
- 12  
13  
14 [21] Rodríguez LA. One-year follow-up of newly diagnosed irritable bowel syndrome patients *Alimentary*  
15 *Pharmacology and Therapeutics* 1999;13:1097-1102.
- 16  
17  
18 [22] Lee CG, Lee JK, Kang YS, et al. Visceral abdominal obesity is associated with an increased risk of  
19 irritable bowel syndrome. *The American journal of gastroenterology* 2015;110:310-319.
- 20  
21  
22 [23] Lee H, Park JH, Park DI et al. Mucosal mast cell count is associated with intestinal permeability in  
23 patients with diarrhea predominant irritable bowel syndrome. *Journal of Neurogastroenterology and Motility*  
24 2013;19:244-250.
- 25  
26  
27 [24] Eslick GD. Gastrointestinal symptoms and obesity: a meta-analysis. *Obesity Reviews* 2012;13:469-479.
- 28  
29  
30 [25] Neri L, Iovino P. Bloating is associated with worse quality of life, treatment satisfaction, and treatment  
31 responsiveness among patients with constipation - predominant irritable bowel syndrome and functional  
32 constipation. *Neurogastroenterology and Motility* 2016;28: 581-591.
- 33  
34  
35 [26] Amouretti M, Le Pen C, Gaudin AF, et al. Impact of irritable bowel syndrome (IBS) on health-related  
36 quality of life (HRQOL). *Gastroenterologie clinique et biologique* 2006;30: 241-246.
- 37  
38  
39 [27] Richards MM, D Adams TED, Hunt SC. Functional status and emotional well-being, dietary intake, and  
40 physical activity of severely obese subjects. *Journal of the American dietetic association* 2000;100:67-75.
- 41  
42  
43  
44  
45  
46  
47  
48  
49  
50  
51  
52  
53  
54  
55  
56  
57  
58  
59  
60

1 [28] Mykletun A, Jacka F, Williams L, et al. Prevalence of mood and anxiety disorder in self-reported irritable  
2  
3 bowel syndrome (IBS). An epidemiological population based study of women. *BMC Gastroenterology* 2010;  
4  
5 10: 88.

6  
7  
8 [29] Demirkan A, Penninx B W J H, Hek K, et al. Genetic risk profiles for depression and anxiety in adult and  
9  
10 elderly cohorts. *Molecular psychiatry* 2011; 16: 773.

11  
12  
13 [30] Lassale C, Péneau S, Touvier M, et al. Validity of web-based self-reported weight and height: results of  
14  
15 the Nutrinet-Santé study. *Journal of Medical Internet Research* 2013;15:e152.

16  
17  
18 [31] Siah KTH, Wong RK, Chan YH, et al. Prevalence of irritable bowel syndrome in Singapore and its  
19  
20 association with dietary, lifestyle, and environmental factors. *Journal of Neurogastroenterology and Motility*  
21  
22 2016;22:670-676.  
23  
24  
25  
26  
27  
28  
29  
30

### 31 **Footnotes**

32  
33  
34 **CONTRIBUTORS:** Yuanjun Dong, Jonas Tesarz, Rainer Schaefer and Wolfgang Eich designed the study  
35  
36 and wrote the protocol. Yuanjun Dong, Sabrina Berens and Jonas Tesarz performed the literature searches and  
37  
38 analyses. Yuanjun Dong wrote the first draft of the manuscript. All of the authors contributed to and have  
39  
40 approved the final manuscript.  
41  
42  
43

44 **FINANCIAL SUPPORT:** This research received no specific grant from any funding agency in the public,  
45  
46 commercial or not-for-profit sectors.  
47  
48

49 **COMPETING INTERESTS:** The authors have indicated no financial conflicts of interest.  
50

51 **PATIENT CONSENT:** Obtained.  
52

53  
54 **ETHICS APPROVAL:** This study was approved by the Ethics Committee of Heidelberg University  
55  
56 (S-041/2014) and carried out in accordance with the Declaration of Helsinki.  
57  
58

**PROVENANCE AND PEER REVIEW:** Not commissioned; externally peer reviewed.

**DATA SHARING STATEMENT:** There is no additional unpublished data from this study.

**Tables:**

Table 1. Distribution of BMI at symptom severity and QOL based on several demographic and clinical features (n = 366)

|                         | N   | BMI<br>mean (SD) | Symptom severity<br>mean (SD) | Quality of life              |                            |
|-------------------------|-----|------------------|-------------------------------|------------------------------|----------------------------|
|                         |     |                  |                               | Physical health<br>mean (SD) | Mental health<br>mean (SD) |
| <b>Gender</b>           |     |                  |                               |                              |                            |
| Male                    | 114 | 24.30 (3.48)     | 280.27 (78.23)                | 42.21 (7.87) *               | 39.41 (12.76)              |
| Female                  | 252 | 23.71 (5.84)     | 292.10 (76.14)                | 40.21 (9.16)                 | 39.23 (11.84)              |
| <b>Age</b>              |     |                  |                               |                              |                            |
| 18-49                   | 264 | 23.36 (5.14) *   | 293.39 (77.52) *              | 41.28 (8.21)                 | 38.32 (12.17) *            |
| > 50                    | 102 | 25.29 (5.12)     | 275.55 (74.04)                | 39.69 (10.19)                | 41.80 (11.67)              |
| <b>Family status</b>    |     |                  |                               |                              |                            |
| Single                  | 160 | 22.69 (4.13) #   | 298.15 (71.90)                | 41.42 (7.69)                 | 37.96 (12.09)              |
| Marr <sup>§</sup>       | 164 | 25.19 (5.07)     | 281.94 (82.67)                | 40.58 (9.59)                 | 40.32 (12.18)              |
| Divo <sup>§</sup>       | 37  | 23.50 (5.11)     | 283.11 (69.13)                | 39.45 (10.12)                | 40.87 (11.20)              |
| <b>Education status</b> |     |                  |                               |                              |                            |
| Below Hs <sup>§</sup>   | 97  | 24.62 (6.19)     | 296.31 (71.99)                | 38.40 (9.33) *               | 40.51 (12.35)              |
| Above Hs <sup>§</sup>   | 232 | 23.68 (4.87)     | 286.54 (81.60)                | 42.10 (8.47)                 | 38.60 (12.02)              |
| <b>IBS subtypes</b>     |     |                  |                               |                              |                            |
| IBS-C                   | 37  | 23.38 (5.34)     | 293.13 (82.41)                | 40.76 (9.33)                 | 40.43 (12.30)              |

|   |       |     |                           |                |              |               |
|---|-------|-----|---------------------------|----------------|--------------|---------------|
| 1 | IBS-D | 151 | 24.69 (5.93) <sup>△</sup> | 293.96 (78.00) | 40.57 (9.17) | 38.74 (12.88) |
| 2 |       |     |                           |                |              |               |
| 3 | IBS-M | 168 | 23.22 (4.01)              | 283.53 (73.19) | 41.09 (8.40) | 38.98 (11.39) |
| 4 |       |     |                           |                |              |               |

5 \*  $p < 0.05$

6  
7 #  $p < 0.05$  for post-hoc comparison between single and Married or unmarried cohabitation

8  
9  $\Delta p < 0.05$  for post-hoc comparison between IBS-D and IBS-M

10  
11 § Marr means “Married or unmarried cohabitation”, Divo means “Divorced or widowed”, Hs means “High  
12 school”

13  
14 IBS-U was not included in the analysis because the sample size is too small.

15  
16 Symptom severity based on IBS-SSS: Mild (IBS-SSS: 75-175), Moderate (IBS-SSS: 175-300) and Severe  
17 (IBS-SSS: > 300).

18  
19 QOL based on SF-36: range from 0 (“highest disability”) to 100 (“no disability”).

20  
21 IBS-C, IBS with constipation; IBS-D, IBS with diarrhea; IBS-M, mixed IBS; BMI, body mass index;  
22  
23  
24  
25  
26  
27  
28  
29  
30  
31  
32  
33  
34  
35  
36  
37  
38  
39  
40  
41  
42  
43  
44  
45  
46  
47  
48  
49  
50  
51  
52  
53  
54  
55  
56  
57  
58  
59  
60

Table 2. Correlation Matrix for the Study Variables in IBS patients

|                  | BMI      | Age     | Symptom severity | Physical Health | Mental health |
|------------------|----------|---------|------------------|-----------------|---------------|
| BMI              | 1.00     |         |                  |                 |               |
| Age              | 0.173**  | 1.00    |                  |                 |               |
| Symptom severity | 0.055    | -0.129* | 1.00             |                 |               |
| Physical Health  | -0.177** | -0.085  | -0.349**         | 1.00            |               |
| Mental health    | 0.033    | 0.167** | -0.268**         | 0.029           | 1.00          |

\*  $p < 0.05$

\*\*  $p < 0.01$

BMI, Body mass index;

Table 3. Results of hierarchical multiple regression relating physical health and mental health to symptom severity and BMI

|                                       | Model 1 |         | Model 2 |          | Model 3 |          | Model summary |         |            |              |
|---------------------------------------|---------|---------|---------|----------|---------|----------|---------------|---------|------------|--------------|
|                                       | $\beta$ | $t$     | $\beta$ | $t$      | $\beta$ | $t$      | $F$           | $R^2$   | $\Delta F$ | $\Delta R^2$ |
| <b>Physical health</b>                |         |         |         |          |         |          |               |         |            |              |
| Age                                   | -0.081  | -1.093  | -0.116  | -1.688   | -0.141  | -2.063*  | 2.252*        | 0.052*  | -          | -            |
| Gender                                | -0.061  | -1.052  | -0.050  | -0.937   | -0.033  | -0.611   |               |         |            |              |
| Single & Marr <sup>§</sup>            | -0.020  | -0.263  | 0.003   | 0.048    | -0.030  | -0.439   |               |         |            |              |
| Divo <sup>§</sup> & Marr <sup>§</sup> | -0.043  | -0.697  | -0.035  | -0.609   | -0.035  | -0.621   |               |         |            |              |
| Education                             | 0.174   | 2.913** | 0.150   | 2.725**  | 0.130   | 2.404*   |               |         |            |              |
| IBS-C & IBS-D                         | 0.032   | 0.529   | 0.024   | 0.438    | -0.004  | -0.081   |               |         |            |              |
| IBS-M & IBS-D                         | 0.048   | 0.775   | 0.003   | 0.049    | -0.030  | -0.529   |               |         |            |              |
| Symptom severity                      | -       | -       | -0.389  | -7.246** | -0.387  | -7.295** | 8.007**       | 0.200** | 52.498**   | 0.147**      |
| Under <sup>§</sup> & Normal           | -       | -       | -       | -        | -0.003  | -0.060   | 7.965**       | 0.237** | 4.605**    | 0.037**      |
| Over <sup>§</sup> & Normal            | -       | -       | -       | -        | 0.067   | 1.193    |               |         |            |              |
| Obesity & Normal                      | -       | -       | -       | -        | -0.177  | -3.170** |               |         |            |              |
| <b>Mental health</b>                  |         |         |         |          |         |          |               |         |            |              |
| Age                                   | 0.159   | 2.106*  | 0.133   | 1.834    | 0.119   | 1.611    | 0.854         | 0.020   | -          | -            |
| Gender                                | -0.029  | -0.499  | -0.021  | -0.375   | -0.006  | -0.110   |               |         |            |              |
| Single & Marr <sup>§</sup>            | 0.052   | 0.690   | 0.070   | 0.958    | 0.068   | 0.922    |               |         |            |              |
| Divo <sup>§</sup> & Marr <sup>§</sup> | -0.020  | -0.316  | -0.014  | -0.224   | -0.007  | -0.117   |               |         |            |              |
| Education                             | -0.045  | -0.750  | -0.064  | -1.092   | -0.066  | -1.133   |               |         |            |              |
| IBS-C & IBS-D                         | 0.024   | 0.381   | 0.018   | 0.300    | 0.009   | 0.144    |               |         |            |              |
| IBS-M & IBS-D                         | 0.022   | 0.356   | -0.012  | -0.194   | -0.025  | -0.408   |               |         |            |              |
| Symptom severity                      | -       | -       | -0.294  | -5.179** | -0.301  | -5.263** | 4.168**       | 0.105** | 26.824**   | 0.084**      |
| Under <sup>§</sup> & Normal           | -       | -       | -       | -        | -0.077  | -1.307   | 3.234**       | 0.112** | 0.772      | 0.007        |
| Over <sup>§</sup> & Normal            | -       | -       | -       | -        | 0.017   | 0.280    |               |         |            |              |
| Obesity & Normal                      | -       | -       | -       | -        | -0.041  | -0.684   |               |         |            |              |

\*  $p < 0.05$

\*\*  $p < 0.01$

Model 1 factors: age, gender, family status, education status, IBS subtypes;

1 Model 2 factors: age, gender, family status, education status, IBS subtypes, symptom severity;

2 Model 3 factors: age, gender, family status, education status, IBS subtypes, symptom severity, BMI  
3 categories.

4 § Marr means “Married or unmarried cohabitation”, Divo means “Divorced or widowed, Under means  
5 “underweight”, Over means “overweight”.

6 IBS-U was not included in the analysis because the sample size is too small.

7 Underweight, BMI < 18.5 kg/m<sup>2</sup>; normal weight, BMI 18.5–25 kg/m<sup>2</sup>; overweight, 25–30 kg/m<sup>2</sup>; obesity,  
8 BMI > 30 kg/m<sup>2</sup>; IBS-C, IBS with constipation; IBS-D, IBS with diarrhea; IBS-M, mixed IBS; BMI, body  
9 mass index

10  
11  
12  
13  
14  
15  
16  
17  
18  
19  
20  
21  
22  
23  
24  
25  
26  
27  
28  
29  
30  
31  
32  
33  
34  
35  
36  
37  
38  
39  
40  
41  
42  
43  
44  
45  
46  
47  
48  
49  
50  
51  
52  
53  
54  
55  
56  
57  
58  
59  
60

For peer review only

STROBE Statement—Checklist of items that should be included in reports of *cross-sectional studies*

|                              | Item No | Recommendation                                                                                                                                                                                                                                                                                                                                                                                                                    |
|------------------------------|---------|-----------------------------------------------------------------------------------------------------------------------------------------------------------------------------------------------------------------------------------------------------------------------------------------------------------------------------------------------------------------------------------------------------------------------------------|
| <b>Title and abstract</b>    | 1       | (a) Indicate the study's design with a commonly used term in the title or the abstract <b>【Page 1】</b><br>(b) Provide in the abstract an informative and balanced summary of what was done and what was found <b>【Pages 2 - 3】</b>                                                                                                                                                                                                |
| <b>Introduction</b>          |         |                                                                                                                                                                                                                                                                                                                                                                                                                                   |
| Background/rationale         | 2       | Explain the scientific background and rationale for the investigation being reported <b>【Pages 4】</b>                                                                                                                                                                                                                                                                                                                             |
| Objectives                   | 3       | State specific objectives, including any prespecified hypotheses <b>【Pages 4】</b>                                                                                                                                                                                                                                                                                                                                                 |
| <b>Methods</b>               |         |                                                                                                                                                                                                                                                                                                                                                                                                                                   |
| Study design                 | 4       | Present key elements of study design early in the paper <b>【Pages 5 - 7】</b>                                                                                                                                                                                                                                                                                                                                                      |
| Setting                      | 5       | Describe the setting, locations, and relevant dates, including periods of recruitment, exposure, follow-up, and data collection <b>【Page 5 - 7】</b>                                                                                                                                                                                                                                                                               |
| Participants                 | 6       | (a) Give the eligibility criteria, and the sources and methods of selection of participants <b>【Page 5】</b>                                                                                                                                                                                                                                                                                                                       |
| Variables                    | 7       | Clearly define all outcomes, exposures, predictors, potential confounders, and effect modifiers. Give diagnostic criteria, if applicable <b>【Pages 6 - 7】</b>                                                                                                                                                                                                                                                                     |
| Data sources/<br>measurement | 8*      | For each variable of interest, give sources of data and details of methods of assessment (measurement). Describe comparability of assessment methods if there is more than one group <b>【Pages 6 - 7】</b>                                                                                                                                                                                                                         |
| Bias                         | 9       | Describe any efforts to address potential sources of bias <b>【Page 5】</b>                                                                                                                                                                                                                                                                                                                                                         |
| Study size                   | 10      | Explain how the study size was arrived at <b>【Page 5】</b>                                                                                                                                                                                                                                                                                                                                                                         |
| Quantitative variables       | 11      | Explain how quantitative variables were handled in the analyses. If applicable, describe which groupings were chosen and why <b>【Pages 6 - 7】</b>                                                                                                                                                                                                                                                                                 |
| Statistical methods          | 12      | (a) Describe all statistical methods, including those used to control for confounding <b>【Pages 6 - 7】</b><br>(b) Describe any methods used to examine subgroups and interactions <b>【Page 6 - 7】</b><br>(c) Explain how missing data were addressed <b>【Page 6 - 7】</b><br>(d) If applicable, describe analytical methods taking account of sampling strategy <b>【N/A】</b><br>(e) Describe any sensitivity analyses <b>【N/A】</b> |
| <b>Results</b>               |         |                                                                                                                                                                                                                                                                                                                                                                                                                                   |
| Participants                 | 13*     | (a) Report numbers of individuals at each stage of study—eg numbers potentially eligible, examined for eligibility, confirmed eligible, included in the study, completing follow-up, and analysed <b>【Page 7 - 8; table 1】</b><br>(b) Give reasons for non-participation at each stage <b>【N/A】</b><br>(c) Consider use of a flow diagram <b>【N/A】</b>                                                                            |
| Descriptive data             | 14*     | (a) Give characteristics of study participants (eg demographic, clinical, social) and information on exposures and potential confounders <b>【Pages 7 - 9】</b><br>(b) Indicate number of participants with missing data for each variable of interest <b>【Page 7; table 1】</b>                                                                                                                                                     |
| Outcome data                 | 15*     | Report numbers of outcome events or summary measures <b>【Pages 7 - 9, table 1-3】</b>                                                                                                                                                                                                                                                                                                                                              |
| Main results                 | 16      | (a) Give unadjusted estimates and, if applicable, confounder-adjusted estimates and their precision (eg, 95% confidence interval). Make clear which confounders were adjusted for and why they were included <b>【Pages 7 - 9; table 1 - 3】</b>                                                                                                                                                                                    |



|                          |    |                                                                                                                                                                                                  |
|--------------------------|----|--------------------------------------------------------------------------------------------------------------------------------------------------------------------------------------------------|
|                          |    | (b) Report category boundaries when continuous variables were categorized <b>【N/A】</b>                                                                                                           |
|                          |    | (c) If relevant, consider translating estimates of relative risk into absolute risk for a meaningful time period <b>【N/A】</b>                                                                    |
| Other analyses           | 17 | Report other analyses done—eg analyses of subgroups and interactions, and sensitivity analyses <b>【N/A】</b>                                                                                      |
| <b>Discussion</b>        |    |                                                                                                                                                                                                  |
| Key results              | 18 | Summarise key results with reference to study objectives <b>【Page 9 - 12】</b>                                                                                                                    |
| Limitations              | 19 | Discuss limitations of the study, taking into account sources of potential bias or imprecision. Discuss both direction and magnitude of any potential bias <b>【Page 11】</b>                      |
| Interpretation           | 20 | Give a cautious overall interpretation of results considering objectives, limitations, multiplicity of analyses, results from similar studies, and other relevant evidence <b>【Pages 9 - 12】</b> |
| Generalisability         | 21 | Discuss the generalisability (external validity) of the study results <b>【Pages 9 - 12】</b>                                                                                                      |
| <b>Other information</b> |    |                                                                                                                                                                                                  |
| Funding                  | 22 | Give the source of funding and the role of the funders for the present study and, if applicable, for the original study on which the present article is based <b>【Page 15】</b>                   |

\*Give information separately for exposed and unexposed groups.

**Note:** An Explanation and Elaboration article discusses each checklist item and gives methodological background and published examples of transparent reporting. The STROBE checklist is best used in conjunction with this article (freely available on the Web sites of PLoS Medicine at <http://www.plosmedicine.org/>, Annals of Internal Medicine at <http://www.annals.org/>, and Epidemiology at <http://www.epidem.com/>). Information on the STROBE Initiative is available at [www.strobe-statement.org](http://www.strobe-statement.org).

# BMJ Open

## Is body mass index associated with symptom severity and health-related quality of life in irritable bowel syndrome? A cross-sectional study

|                                 |                                                                                                                                                                                                                                                                                                                                                                                                                        |
|---------------------------------|------------------------------------------------------------------------------------------------------------------------------------------------------------------------------------------------------------------------------------------------------------------------------------------------------------------------------------------------------------------------------------------------------------------------|
| Journal:                        | <i>BMJ Open</i>                                                                                                                                                                                                                                                                                                                                                                                                        |
| Manuscript ID                   | bmjopen-2017-019453.R4                                                                                                                                                                                                                                                                                                                                                                                                 |
| Article Type:                   | Research                                                                                                                                                                                                                                                                                                                                                                                                               |
| Date Submitted by the Author:   | 10-Aug-2018                                                                                                                                                                                                                                                                                                                                                                                                            |
| Complete List of Authors:       | Dong, Yuanjun; Universitätsklinikum Heidelberg Medizinische Klinik, Clinic for General Internal Medizin and Psychosomatics<br>Berens, Sabrina; Universitätsklinikum Heidelberg Medizinische Klinik Eich, Wolfgang; Universitätsklinikum Heidelberg Medizinische Klinik Schaefer, Rainer; University Hospital Basel, Department of Psychosomatics<br>Tesarz, Jonas; Universitätsklinikum Heidelberg Medizinische Klinik |
| <b>Primary Subject Heading</b>: | Gastroenterology and hepatology                                                                                                                                                                                                                                                                                                                                                                                        |
| Secondary Subject Heading:      | Nutrition and metabolism, Mental health                                                                                                                                                                                                                                                                                                                                                                                |
| Keywords:                       | Irritable bowel syndrome, Body mass index, Symptom severity, Quality of life                                                                                                                                                                                                                                                                                                                                           |
|                                 |                                                                                                                                                                                                                                                                                                                                                                                                                        |

SCHOLARONE™  
Manuscripts

Only

**Original Article****Is body mass index associated with symptom severity and health-related quality of life in irritable bowel syndrome? A cross-sectional study**

Yuanjun Dong<sup>1</sup>, M.M., Sabrina Berens<sup>1</sup>, M.Sc., Wolfgang Eich<sup>1</sup>, M.D., PhD., Rainer Schaefer<sup>2</sup>, M.D., PhD.,

Jonas Tesarz<sup>1,\*</sup>, M.D. PhD.

<sup>1</sup> **Department of General Internal Medicine and Psychosomatics, University Hospital Heidelberg, Im Neuenheimer Feld 410, 69120 Heidelberg, Germany**

<sup>2</sup> **Department of Psychosomatics, Division of Internal Medicine, University Hospital Basel, University of Basel, Hebelstrasse 2, CH-4031 Basel, Switzerland**

**\* Corresponding Author.**

**Address correspondence to:** Jonas Tesarz, Department of General Internal Medicine and Psychosomatics, University Hospital Heidelberg, Im Neuenheimer Feld 410, 69120 Heidelberg, Germany. Tel: 0049 /6221/56-37862, E-mail: [Jonas.Tesarz@med.uni-heidelberg.de](mailto:Jonas.Tesarz@med.uni-heidelberg.de)

## Abstract

### Objective

The aim of this study was to describe the body mass index (BMI) distribution in patients with irritable bowel syndrome (IBS) based on the Rome III criteria, and to evaluate the association of BMI with symptom severity and quality of life (QOL).

### Methods

A cross-sectional study was carried out in patients visiting our outpatient Functional Gastrointestinal Disorders specialty clinic. IBS diagnosis was made based on Rome III criteria. IBS symptom severity was investigated using the IBS severity score system (IBS-SSS). QOL was assessed using the Short-Form-36-Health-Survey (SF-36), which consists of physical health and mental health.

### Results

366 patients (252 females) who fulfilled Rome III criteria and provided complete BMI data ( $23.90 \pm 5.22$  kg/m<sup>2</sup>) were included. Overall, 59.0% of patients with IBS were in the normal weight range, 30.3% were overweight or obese, and 10.7% were underweight. Both physical and mental health decreased significantly with the severity of symptoms (all  $p < 0.01$ ), whilst controlling for several covariates (age, gender, family status, education status and IBS subtypes). Obesity and symptom severity ( $\beta = -0.177$ ,  $\Delta R^2 = 0.037$ ,  $p < 0.01$ ;  $\beta = -0.387$ ,  $\Delta R^2 = 0.147$ ,  $p < 0.01$ ) were significant negative factors that influencing physical health. Symptom severity ( $\beta = -0.301$ ,  $\Delta R^2 = 0.084$ ,  $p < 0.01$ ) was significant negative factor that influencing mental health. However, BMI didn't account for additional variance in mental health ( $p > 0.05$ ).

### Conclusion

Being overweight is a common phenomenon in patients with IBS regardless of IBS subtype. The association between QOL and symptom severity followed a negative dose response pattern. Patients with

1 higher BMI, especially obese patients, were more frequently in poor physical health. However, this kind of  
2  
3 relationship was not found in BMI and mental health.  
4

5  
6 **Keywords:**

7  
8 Irritable bowel syndrome; Body mass index; Symptom severity; Quality of life  
9

10  
11  
12  
13  
14  
15  
16 **Strengths and limitations of this study:**

- 17  
18 1) This study uses a large and well described patient cohort with a validated diagnosis of IBS based on the  
19 Rome III criteria;  
20  
21 2) The association between QOL and symptom severity followed a negative dose response pattern;  
22  
23 3) Patients with higher BMI were more frequently in poor physical health. However, this kind of relationship  
24 was not found in BMI and mental health of QOL.  
25  
26 4) The study was cross-sectional, therefore it is not possible to infer causation;  
27  
28 5) BMI cannot fully reflect the impact of the factors of fatty mass, dietary habit, other lifestyle factors such as  
29 physical exercise on IBS.  
30  
31  
32  
33  
34  
35  
36  
37  
38  
39  
40  
41  
42  
43  
44  
45  
46  
47  
48  
49  
50  
51  
52  
53  
54  
55  
56  
57  
58  
59  
60

## 1 Introduction

Irritable bowel syndrome (IBS) is a chronic and common functional bowel disorder that is characterized by recurrent abdominal pain or discomfort associated with altered bowel habits [1]. According to the Rome III criteria, IBS is classified into four subtypes [IBS with diarrhoea (IBS-D), IBS with constipation (IBS-C), mixed IBS (IBS-M) and un-subtyped IBS (IBS-U)] based on the predominant abdominal symptomatology [1]. It has been frequently reported that IBS leads to impaired quality of life (QOL) [2-4]. The symptoms of IBS are associated with different eating habits [5]. In a recent randomized controlled trial, a diet low in Fermentable Oligo-, Di-, Mono-saccharides And Polyols (FODMAPs) was shown to improve the IBS-D patients' QOL, anxiety, and activity impairment [6].

Epidemiologic studies have shown that as many as 16.5% of adults in European countries are obese [body mass index (BMI) > 30 kg/m<sup>2</sup>] [7] and that the incidence of obesity is increasing [8]. Additionally, a cross-sectional multicentre study found that more than 63% of outpatients and 80% of inpatients in gastroenterological centres suffered from significant changes in body composition [9]. In addition, underweight (BMI < 18.5 kg/m<sup>2</sup>) or obese body condition (BMI > 30 kg/m<sup>2</sup>) are both associated with multiple abdominal symptoms leading to reduced QOL [10, 11]. Although extensive research has been carried out on the prevalence of obesity in the general population and in connection with numerous diseases, there is only little published data on the prevalence and clinical relevance of nutritional status and body mass in patients with IBS. Locke *et al.* [12] found no association between IBS status and BMI. However, this study was a population-based study. Studies with large enough sample size based on clinic patients are missing so far.

Therefore, the aim of this study was to describe the BMI distribution in patients with IBS based on the Rome III criteria, and to evaluate the association of BMI with symptom severity and the physical health and mental health of QOL.

## 2 Methods

This cross-sectional survey included patients evaluated at the Functional Gastrointestinal Disorders (FGIDs) specialty clinic of the Department of General Internal Medicine and Psychosomatics of Heidelberg University Hospital, which is a tertiary care facility. All patients who completed our routine baseline documentation were enrolled. The routine data from individual health records was transferred into the database and pseudonymized. This study was approved by the Ethics Committee of Heidelberg University (S-041/2014) and carried out in accordance with the Declaration of Helsinki.

### 2.1 Patients recruitment

From 01/2011 to 12/2016, patients' clinical data were consecutively collected from our outpatient FGIDs clinic at Heidelberg University Hospital for this explorative and descriptive study. All patients  $\geq 18$  years of age, who voluntarily signed an informed consent, were included, if they fulfilled the Rome III criteria for the diagnosis of IBS [1]. There was no exclusion criteria. The subtype criteria for IBS were based on stool consistency as assessed by the Bristol Stool Scale (BSS) and Rome III criteria [13]. Demographic data including gender, age, family status, level of education and residence, was also collected at baseline using the Psychosomatic Basis Documentation Questionnaire (Psy-BaDo) [14].

### 2.2 Patient Involvement

No patients were involved in conducting the study. However, in order to increase the clinical relevance of the study, we established an advisory group to advise the research project.

### 2.3 Measurement of IBS symptom severity

Patients rated the severity of their IBS symptoms by completing the IBS severity score system (IBS-SSS) [15]. The IBS-SSS has a maximum score of 500 and comprises five items: frequency and intensity of abdominal pain, severity of abdominal distension, dissatisfaction with bowel habits, and interference of IBS with daily life. Based on validated cut-off values, three IBS severity subgroups can be distinguished: Mild (IBS-SSS: 75-175), Moderate (IBS-SSS: 175-300) and Severe (IBS-SSS: > 300). The German version of this questionnaire was validated by Betz *et al.* [16] and the total score was computed in accordance with the manual.

### 2.4 Measurement of BMI

BMI was calculated as the individual's self-reported body weight (kg) divided by the square of their height (m). BMI was categorized according to the World Health Organization (WHO) classification of physical status [17]: underweight (BMI < 18.5 kg/m<sup>2</sup>), normal weight (BMI 18.5–25 kg/m<sup>2</sup>), overweight (25–30 kg/m<sup>2</sup>), or obese body condition (BMI > 30 kg/m<sup>2</sup>).

### 2.5 Measurement of quality of life

Quality of life was measured using the Short Form 36 Health Survey (SF-36) [18]. SF-36 is a 36-item, patient-reported survey of patient quality of life, which consists of a physical health index and mental health index. The SF-36 is widely used and well validated for assessing generic health outcomes. Each scale is directly transformed into a 0-100 scale. Lower scores represent a higher degree of disability. Validation of the German version was performed by Morfeld *et al.* [19].



## 2.6 Statistical analysis

Routine data were transformed into an SPSS file and evaluated using the statistical program SPSS (IBM, version 22.0). Descriptive statistics are presented as the means and standard deviation (*SD*) for continuous variables and as absolute numbers and percentages for categorical variables. All analyses were explorative and not of a confirmatory nature. All primary and secondary variables were first tested for normal distribution. For normally distributed variables, the mean and standard deviation were calculated. Variables that lacked a normal distribution were reported using the median and interquartile range. The Mann-Whitney U Test was used to assess the level of significance because a number of participants differed between the groups. Comparison of socio-demographical and anthropometric data according to BMI was performed using analysis of variance (ANOVA) and nonparametric tests in the first instance. Where significant group differences were detected based on ANOVA, post-hoc least significant difference tests were conducted to compare the study groups in a pairwise fashion. We also used the Pearson correlation coefficients to investigate the linear association between demographics, BMI, clinical and psychological features. Hierarchical multiple regression was used to help understand the impact of potential confounders as well as the predictive role of BMI in physical health and mental health of QOL. We tested the impact of the confounders (gender, age, family status, education status and IBS subtypes) in Model 1. In model 2, we added the symptom severity. BMI categories (underweight, normal weight, overweight and obesity) were added in model 3. All tests were two-sided and statistical significance was accepted if  $p < 0.05$ .

### 3 Results

#### 3.1 Characteristics of study sample

A total of 576 patients completed the questionnaire. Excluding 113 patients whose Rome III criteria data were partly missing, 366 patients with IBS were enrolled in this study (114 males, 252 females; mean BMI  $23.90 \pm 5.22$  kg/m<sup>2</sup>). The demographic and baseline characteristics of the patients with IBS among the different subtypes are summarized in Table 1. Of the included subjects, the most frequent IBS subtype was IBS-M (45.9%), followed by IBS-D (41.3%), and IBS-C (10.1%). Only 59.0% of patients with IBS were within the normal weight range, whereas 30.3% were overweight or obese, and only a minority were underweight (10.7%). The percentage of obese patients was highest in IBS-D (17.9%,  $p < 0.01$ ). Taking gender into account, 5.3% of males and 13.1% of females were underweight. Additionally, 7.0% of males and 13.1% of females were obese and 26.3% of males and 15.9% of females were overweight. Overall, patients reported moderate to severe IBS symptom severity (IBS-SSS range: 125 - 484) and lower QOL (physical health range of SF-36: 15.19 – 64.00, mental health range of SF-36: 7.89 – 65.85).

#### 3.2 Correlations between BMI, symptom severity and QOL

Pearson product-moment correlations indicated that high BMI values and elevated symptom severity were associated with poorer QOL. As shown in Table 2, BMI was negatively correlated with physical health ( $r = -0.177$ ,  $p < 0.01$ ). Symptom severity was negatively correlated with physical health ( $r = -0.394$ ,  $p < 0.01$ ) and mental health ( $r = -0.268$ ,  $p < 0.01$ ). Additionally, age was negatively correlated with symptom severity ( $r = -0.129$ ,  $p < 0.05$ ) and positively correlated with physical health ( $r = 0.167$ ,  $p < 0.01$ ).

### 3.3 Characteristics of BMI, symptom severity and QOL Across Demographic and IBS subtypes

As shown in Table 1, male reported significantly higher physical health problems than female ( $t = 2.141$ ,  $p < 0.05$ ). Compared to older patients (age  $> 50$ ), the younger patients (age 18 - 49) reported significantly lower BMI level ( $t = -3.20$ ,  $p < 0.01$ ), greater symptom severity ( $t = 2.039$ ,  $p < 0.05$ ) and worse mental health ( $t = -2.528$ ,  $p < 0.05$ ). Patients living with a stable partner (married or unmarried cohabitation) had higher BMI compared to single participants ( $t = -4.397$ ,  $p < 0.01$ ). The patients with below high school education reported significantly higher physical health problems than those who with above high school education ( $t = -3.376$ ,  $p < 0.01$ ). Compared with IBS-M patients, the IBS-D patients reported significantly higher BMI level ( $t = -2.572$ ,  $p < 0.05$ ).

### 3.4 the influences of BMI in physical health and mental health of QOL

As shown in Table 3, the hierarchical multiple regression examined the relationship between dependent variable (physical health) and independent variables (symptom severity and BMI). Model 1 was significant ( $F = 2.252$ ,  $p < 0.05$ ) and explained 5.2% of the variance in physical health. Education status ( $\beta = 0.174$ ,  $p < 0.01$ ) was a significant positive factor that influencing physical health. In model 2, symptom severity significantly added to the amount of explained variance ( $\Delta R^2 = 0.147$ ,  $\Delta F = 52.498$ ,  $p < 0.01$ ). In model 3, BMI also significantly added to the amount of explained variance ( $\Delta R^2 = 0.037$ ,  $\Delta F = 4.605$ ,  $p < 0.01$ ). Obesity ( $\beta = -0.177$ ,  $p < 0.01$ ) was a significant negative factor that influencing physical health. Similarly, when mental health was used as the dependent variable, Model 1 was insignificant ( $F = 0.854$ ,  $p > 0.05$ ). In model 2, symptom severity significantly increased the amount of explained variance ( $\Delta R^2 = 0.084$ ,  $\Delta F = 26.824$ ,  $p < 0.01$ ). In model 3, BMI didn't account for an additional significant amount of variance in mental health ( $\Delta R^2 = 0.007$ ,  $\Delta F = 0.772$ ,  $p > 0.05$ ).

#### 4 Discussion

This study sought to describe the BMI distribution in patients with IBS based on the Rome III criteria, and to evaluate the association of BMI with symptom severity and the physical health and mental health of QOL. Therefore, we used standardized questionnaires and medical records to confirm the diagnosis and to assess patient symptoms and quality of life.

Our data show that being overweight is a common phenomenon in patients with IBS regardless of IBS subtype. These findings are in agreement with the results of a previous study based on obese patients in France, which found that 30.0% of obese patients had IBS [20]. We found that almost 40% of patients with IBS were not in the normal weight range, which is consistent with previous results [21]. Notably, the overweight and obesity rates in the general adult population in Germany [7] are higher than those found in our IBS cohort. According to the German Health Update (GEDA) [7], in 2012 the overweight rate of adults was 36.2% and the obesity rate was 16.5%. Interestingly, the distribution of weight was similar between the different IBS groups. In particular, there was no difference between IBS-C and IBS-M. Notably, in IBS-D the percentage of obese patients reached 17.9%. Lee *et al.* [22] evaluated the relationship between visceral adipose tissue and the risk of IBS and suggested that disturbances of visceral fat may be more common in IBS-D patients. In addition, another Korean study found increased intestinal permeability in IBS-D patients [23]. One possible explanation is that the increase in visceral fat leads to an increase in intestinal osmolality [24] and then leads to the chronic diarrhea. These studies, however, were confined to patients from South Korea.

IBS has a significant impact on patients' QOL [25]. Our data show an association between symptom severity and QOL with regard to physical and mental health. The patients in our study reported moderate to severe IBS symptom severity and lower QOL. Further, this association followed a negative dose response

1 pattern. Our findings partially match those of Amouretti *et al.* [26], who found that IBS patients who reported  
2 their symptoms as severe or very severe had a very poor QoL compared with those who reported their  
3 symptoms as moderate. However, their study did not distinguish between physical and mental health and did  
4 not consider the effects of confounding factors such as BMI. This is an interesting but not completely new  
5 result which gives rise to the question of what mechanisms are responsible for this association.  
6  
7  
8  
9  
10  
11  
12

13 Through the hierarchical multiple regression, we tested the relationship between dependent variable  
14 (QOL) and independent variables (symptom severity and BMI). We controlled for the impact of the  
15 confounders (gender, age, family status, education status and IBS subtypes). The correlation between  
16 symptom severity and QOL was significantly negative, no matter which BMI category was. Our findings  
17 show that obesity was significant negative predictor of physical health. Patients with higher BMI were more  
18 frequently in poor physical health. This is in line with previous studies [11], in that increasing BMI is  
19 associated with increased upper gastrointestinal symptoms, bloating, and diarrhoea. Obesity may lead to more  
20 physiological stress on organs. Richards *et al.* [27] reported that obese patients have more severe pain and are  
21 to a larger extent restricted in their daily functioning compared to patients of normal weight. An additional  
22 finding of our study was that BMI didn't account for an additional significant amount of variance in mental  
23 health. This was inconsistent with findings by Mykletun [28], who found that BMI had significant association  
24 with IBS with regard to anxiety and mood disorders. However, their study evaluated only female patients. The  
25 findings of genome-wide association studies, from the genetic perspective, suggest the presence of many  
26 genetic loci each with a small effect influencing susceptibility to mental health symptoms (depression and  
27 anxiety) [29]. We can therefore hypothesise that, the unpredictable association between risk of mental health  
28 and BMI in our study may be due to non-modifiable genetic influences which predispose individuals to bad  
29 mental health.  
30  
31  
32  
33  
34  
35  
36  
37  
38  
39  
40  
41  
42  
43  
44  
45  
46  
47  
48  
49  
50  
51  
52  
53  
54  
55  
56  
57  
58  
59  
60

1 Several limitations of this study must be taken into account. First, the study was cross-sectional,  
2  
3 therefore, it is impossible to infer causation. Second, BMI was based on the self-reported height and weight of  
4  
5 patients and computed without objective measurement, therefore bias may have been introduced. Patients may  
6  
7 occasionally underreport or overreport their weight and height leading to an underestimation of underweight  
8  
9 or obese patients. However, in the Nutrinet-Santé study, researchers reported that deviations in self-reported  
10  
11 BMIs from questionnaires can be ignored because their results confirmed the validity and agreement of  
12  
13 self-reported data with measured data [30, 31]. The choice of SF-36 as the only QOL tool may partly miss the  
14  
15 relationship between symptom severity and QOL. Moreover, BMI is associated with a multitude of different  
16  
17 factors, such as genetics, fatty mass, dietary habit or physical exercise. Thus, BMI cannot fully reflect the  
18  
19 impact of those factors on IBS in more details and more research is needed. The strengths of this study,  
20  
21 however are the use of a large patient cohort with a validated diagnosis of IBS based on the Rome III criteria.  
22  
23  
24  
25  
26  
27

28 To conclude, being overweight is a common phenomenon in IBS patients regardless of IBS subtypes.  
29  
30 Our data further suggest that overweight and obesity may have a relevant influence on QOL. Patients with  
31  
32 higher BMI were more frequently in poor physical health. The findings have some implications for future  
33  
34 practice. Clinical doctors should pay special attention to abnormal weight in IBS patients as this maybe an  
35  
36 indicator of a poorer QOL, especially with regard to the physical health.  
37  
38  
39  
40  
41  
42  
43  
44  
45  
46  
47  
48  
49  
50  
51  
52  
53  
54  
55  
56  
57  
58  
59  
60

**References:**

- [1] Drossman DA. The functional gastrointestinal disorders and the Rome III process. *Gastroenterology* 2006;130:1377-1390.
- [2] Lacy, Brian E. Perspective: An easier diagnosis. *Nature* 2016;533.7603: S107-S107.
- [3] Ljótsson B, Hesser H, Andersson E, et al. Provoking symptoms to relieve symptoms: a randomized controlled dismantling study of exposure therapy in irritable bowel syndrome. *Behaviour Research and Therapy* 2014;55:27-39.
- [4] Hoekman, Daniël R, et al. Annual Costs of Care for Pediatric Irritable Bowel Syndrome, Functional Abdominal Pain, and Functional Abdominal Pain Syndrome. *The Journal of Pediatrics* 2015;167.5:1103-1108.
- [5] Hayes P, Corish C, O'mahony E, Quigley EMM. A dietary survey of patients with irritable bowel syndrome. *Journal of human nutrition and dietetics* 2014; 27(s2): 36-47
- [6] Eswaran S, Chey WD, Jackson K, et al. A Diet Low in Fermentable Oligo-, Di-, and Monosaccharides and Polyols Improves Quality of Life and Reduces Activity Impairment in Patients with Irritable Bowel Syndrome and Diarrhea. *Clinical Gastroenterology and Hepatology* 2017; 15:1817-1819.
- [7] Lange C, Jentsch F, Allen J, et al. Data Resource Profile: German Health Update (GEDA)—the health interview survey for adults in Germany. *International journal of epidemiology* 2015; 44: 442-450.
- [8] Gracey M, King M. Indigenous health part 1: determinants and disease patterns. *The Lancet* 2009;374:65-75.

- [9] Rizzi M, Mazzuoli S, Regano N, et al. Undernutrition, risk of malnutrition and obesity in gastroenterological patients: A multicenter study. *World journal of gastrointestinal oncology* 2016; 8: 563.
- [10] van Oijen MG, Josemanders DF, Laheij RJ, van Rossum LG, Tan AC, Jansen JB. Gastrointestinal disorders and symptoms: does body mass index matter? *The Netherlands Journal of Medicine* 2006;64:45–49.
- [11] Talley NJ, Howell S, Poulton R. Obesity and chronic gastrointestinal tract symptoms in young adults: a birth cohort study. *The American Journal of Gastroenterology* 2004;99:1807–1814.
- [12] Locke GR, Zinsmeister AR, Schleck CD, et al. Psychosocial distress and somatic symptoms in community subjects with irritable bowel syndrome: a psychological component is the rule. *The American Journal of Gastroenterology* 2009;104:1772-1779.
- [13] Heaton KW, Gosh S. Relation between stool form on a seven point scale and symptoms of urgency, straining, and incomplete evacuation. *Gut* 1989;30:A1465-A1465.
- [14] Heuft G. Praxis der Qualitätssicherung in der Psychotherapie: das Manual zur Psy-BaDo;[entsprechend den Empfehlungen der psychotherapeutischen Fachgesellschaften]. *Thieme* 1998.
- [15] Kaptchuk TJ, Friedlander E, Kelley JM, et al. Placebos without deception: a randomized controlled trial in irritable bowel syndrome. *PLoS One* 2010;5: e15591.
- [16] Betz C, Mannsdoerfer K, Bischoff SC. Validation of the IBS-SSS. *Zeitschrift für Gastroenterologie* 2013;51:1171-1176.
- [17] World Health Organization. Physical status: The use of and interpretation of anthropometry, Report of a WHO Expert Committee 1995.
- [18] Jenkinson C, Coulter A, Wright L. Short form 36 (SF36) health survey questionnaire: normative data for adults of working age. *BMJ* 1993;306:1437-1440.
- [19] Morfeld M, Kirchberger I, Bullinger M. SF-36 Fragebogen zum Gesundheitszustand: Deutsche Version des Short Form-36 Health Survey. *Hogrefe* 2011.



- 1 [20] Schneck AS, Anty R, Tran A, et al. Increased Prevalence of Irritable Bowel Syndrome in a Cohort of  
2  
3 French Morbidly Obese Patients Candidate for Bariatric Surgery. *Obesity surgery* 2016; 26: 1525-1530.  
4  
5 [21] Rodríguez LA. One-year follow-up of newly diagnosed irritable bowel syndrome patients *Alimentary*  
6  
7 *Pharmacology and Therapeutics* 1999;13:1097-1102.  
8  
9  
10 [22] Lee CG, Lee JK, Kang YS, et al. Visceral abdominal obesity is associated with an increased risk of  
11  
12 irritable bowel syndrome. *The American journal of gastroenterology* 2015;110:310-319.  
13  
14  
15 [23] Lee H, Park JH, Park DI et al. Mucosal mast cell count is associated with intestinal permeability in  
16  
17 patients with diarrhea predominant irritable bowel syndrome. *Journal of Neurogastroenterology and Motility*  
18  
19 2013;19:244-250.  
20  
21  
22 [24] Eslick GD. Gastrointestinal symptoms and obesity: a meta-analysis. *Obesity Reviews* 2012;13:469-479.  
23  
24  
25 [25] Neri L, Iovino P. Bloating is associated with worse quality of life, treatment satisfaction, and treatment  
26  
27 responsiveness among patients with constipation - predominant irritable bowel syndrome and functional  
28  
29 constipation. *Neurogastroenterology and Motility* 2016;28: 581-591.  
30  
31  
32 [26] Amouretti M, Le Pen C, Gaudin AF, et al. Impact of irritable bowel syndrome (IBS) on health-related  
33  
34 quality of life (HRQOL). *Gastroenterologie clinique et biologique* 2006;30: 241-246.  
35  
36  
37 [27] Richards MM, D Adams TED, Hunt SC. Functional status and emotional well-being, dietary intake, and  
38  
39 physical activity of severely obese subjects. *Journal of the American dietetic association* 2000;100:67-75.  
40  
41  
42 [28] Mykletun A, Jacka F, Williams L, et al. Prevalence of mood and anxiety disorder in self-reported irritable  
43  
44 bowel syndrome (IBS). An epidemiological population based study of women. *BMC Gastroenterology* 2010;  
45  
46 10: 88.  
47  
48  
49 [29] Demirkan A, Penninx B W J H, Hek K, et al. Genetic risk profiles for depression and anxiety in adult and  
50  
51 elderly cohorts. *Molecular psychiatry* 2011; 16: 773.  
52  
53  
54  
55  
56  
57  
58  
59  
60

1 [30] Lassale C, Péneau S, Touvier M, et al. Validity of web-based self-reported weight and height: results of  
2  
3 the Nutrinet-Santé study. *Journal of Medical Internet Research* 2013;15:e152.  
4

5 [31] Siah KTH, Wong RK, Chan YH, et al. Prevalence of irritable bowel syndrome in Singapore and its  
6  
7 association with dietary, lifestyle, and environmental factors. *Journal of Neurogastroenterology and Motility*  
8  
9 2016;22:670-676.  
10  
11  
12  
13  
14  
15  
16  
17  
18  
19  
20  
21  
22  
23  
24  
25  
26  
27  
28  
29  
30  
31  
32  
33  
34  
35  
36  
37  
38  
39  
40  
41  
42  
43  
44  
45  
46  
47  
48  
49  
50  
51  
52  
53  
54  
55  
56  
57  
58  
59  
60

For peer review only

**Footnotes**

**CONTRIBUTORS:** Yuanjun Dong, Jonas Tesarz, Rainer Schaefer and Wolfgang Eich designed the study and wrote the protocol. Yuanjun Dong, Sabrina Berens and Jonas Tesarz performed the literature searches and analyses. Yuanjun Dong wrote the first draft of the manuscript. All of the authors contributed to and have approved the final manuscript.

**FINANCIAL SUPPORT:** This research received no specific grant from any funding agency in the public, commercial or not-for-profit sectors.

**COMPETING INTERESTS:** The authors have indicated no financial conflicts of interest.

**PATIENT CONSENT:** Obtained.

**ETHICS APPROVAL:** This study was approved by the Ethics Committee of Heidelberg University (S-041/2014) and carried out in accordance with the Declaration of Helsinki.

**PROVENANCE AND PEER REVIEW:** Not commissioned; externally peer reviewed.

**DATA SHARING STATEMENT:** There is no additional unpublished data from this study.

**Tables:**

Table 1. Distribution of BMI at symptom severity and QOL based on several demographic and clinical features (n = 366)

|                         | N   | BMI<br>mean (SD)          | Symptom severity<br>mean (SD) | Quality of life              |                            |
|-------------------------|-----|---------------------------|-------------------------------|------------------------------|----------------------------|
|                         |     |                           |                               | Physical health<br>mean (SD) | Mental health<br>mean (SD) |
| <b>Gender</b>           |     |                           |                               |                              |                            |
| Male                    | 114 | 24.30 (3.48)              | 280.27 (78.23)                | 42.21 (7.87) *               | 39.41 (12.76)              |
| Female                  | 252 | 23.71 (5.84)              | 292.10 (76.14)                | 40.21 (9.16)                 | 39.23 (11.84)              |
| <b>Age</b>              |     |                           |                               |                              |                            |
| 18-49                   | 264 | 23.36 (5.14) *            | 293.39 (77.52) *              | 41.28 (8.21)                 | 38.32 (12.17) *            |
| > 50                    | 102 | 25.29 (5.12)              | 275.55 (74.04)                | 39.69 (10.19)                | 41.80 (11.67)              |
| <b>Family status</b>    |     |                           |                               |                              |                            |
| Single                  | 160 | 22.69 (4.13) #            | 298.15 (71.90)                | 41.42 (7.69)                 | 37.96 (12.09)              |
| Marr <sup>§</sup>       | 164 | 25.19 (5.07)              | 281.94 (82.67)                | 40.58 (9.59)                 | 40.32 (12.18)              |
| Divo <sup>§</sup>       | 37  | 23.50 (5.11)              | 283.11 (69.13)                | 39.45 (10.12)                | 40.87 (11.20)              |
| <b>Education status</b> |     |                           |                               |                              |                            |
| Below Hs <sup>§</sup>   | 97  | 24.62 (6.19)              | 296.31 (71.99)                | 38.40 (9.33) *               | 40.51 (12.35)              |
| Above Hs <sup>§</sup>   | 232 | 23.68 (4.87)              | 286.54 (81.60)                | 42.10 (8.47)                 | 38.60 (12.02)              |
| <b>IBS subtypes</b>     |     |                           |                               |                              |                            |
| IBS-C                   | 37  | 23.38 (5.34)              | 293.13 (82.41)                | 40.76 (9.33)                 | 40.43 (12.30)              |
| IBS-D                   | 151 | 24.69 (5.93) <sup>Δ</sup> | 293.96 (78.00)                | 40.57 (9.17)                 | 38.74 (12.88)              |
| IBS-M                   | 168 | 23.22 (4.01)              | 283.53 (73.19)                | 41.09 (8.40)                 | 38.98 (11.39)              |

\*  $p < 0.05$ #  $p < 0.05$  for post-hoc comparison between single and Married or unmarried cohabitation $\Delta p < 0.05$  for post-hoc comparison between IBS-D and IBS-M

1 § Marr means “Married or unmarried cohabitation”, Divo means “Divorced or widowed”, Hs means “High  
2 school”  
3

4 IBS-U was not included in the analysis because the sample size is too small.  
5

6 Symptom severity based on IBS-SSS: Mild (IBS-SSS: 75-175), Moderate (IBS-SSS: 175-300) and Severe  
7 (IBS-SSS: > 300).  
8

9 QOL based on SF-36: range from 0 (“highest disability”) to 100 (“no disability”).  
10

11 IBS-C, IBS with constipation; IBS-D, IBS with diarrhea; IBS-M, mixed IBS; BMI, body mass index;  
12  
13  
14  
15  
16  
17  
18  
19  
20  
21  
22  
23  
24  
25  
26  
27  
28  
29  
30  
31  
32  
33  
34  
35  
36  
37  
38  
39  
40  
41  
42  
43  
44  
45  
46  
47  
48  
49  
50  
51  
52  
53  
54  
55  
56  
57  
58  
59  
60

Table 2. Correlation Matrix for the Study Variables in IBS patients

|                  | BMI      | Age     | Symptom severity | Physical Health | Mental health |
|------------------|----------|---------|------------------|-----------------|---------------|
| BMI              | 1.00     |         |                  |                 |               |
| Age              | 0.173**  | 1.00    |                  |                 |               |
| Symptom severity | 0.055    | -0.129* | 1.00             |                 |               |
| Physical Health  | -0.177** | -0.085  | -0.349**         | 1.00            |               |
| Mental health    | 0.033    | 0.167** | -0.268**         | 0.029           | 1.00          |

\*  $p < 0.05$

\*\*  $p < 0.01$

BMI, Body mass index;

For peer review only

Table 3. Results of hierarchical multiple regression relating physical health and mental health to symptom severity and BMI

|                                       | Model 1 |         | Model 2 |          | Model 3 |          | Model summary |         |            |              |
|---------------------------------------|---------|---------|---------|----------|---------|----------|---------------|---------|------------|--------------|
|                                       | $\beta$ | $t$     | $\beta$ | $t$      | $\beta$ | $t$      | $F$           | $R^2$   | $\Delta F$ | $\Delta R^2$ |
| <b>Physical health</b>                |         |         |         |          |         |          |               |         |            |              |
| Age                                   | -0.081  | -1.093  | -0.116  | -1.688   | -0.141  | -2.063*  | 2.252*        | 0.052*  | -          | -            |
| Gender                                | -0.061  | -1.052  | -0.050  | -0.937   | -0.033  | -0.611   |               |         |            |              |
| Single & Marr <sup>§</sup>            | -0.020  | -0.263  | 0.003   | 0.048    | -0.030  | -0.439   |               |         |            |              |
| Divo <sup>§</sup> & Marr <sup>§</sup> | -0.043  | -0.697  | -0.035  | -0.609   | -0.035  | -0.621   |               |         |            |              |
| Education                             | 0.174   | 2.913** | 0.150   | 2.725**  | 0.130   | 2.404*   |               |         |            |              |
| IBS-C & IBS-D                         | 0.032   | 0.529   | 0.024   | 0.438    | -0.004  | -0.081   |               |         |            |              |
| IBS-M & IBS-D                         | 0.048   | 0.775   | 0.003   | 0.049    | -0.030  | -0.529   |               |         |            |              |
| Symptom severity                      | -       | -       | -0.389  | -7.246** | -0.387  | -7.295** | 8.007**       | 0.200** | 52.498**   | 0.147**      |
| Under <sup>§</sup> & Normal           | -       | -       | -       | -        | -0.003  | -0.060   | 7.965**       | 0.237** | 4.605**    | 0.037**      |
| Over <sup>§</sup> & Normal            | -       | -       | -       | -        | 0.067   | 1.193    |               |         |            |              |
| Obesity & Normal                      | -       | -       | -       | -        | -0.177  | -3.170** |               |         |            |              |
| <b>Mental health</b>                  |         |         |         |          |         |          |               |         |            |              |
| Age                                   | 0.159   | 2.106*  | 0.133   | 1.834    | 0.119   | 1.611    | 0.854         | 0.020   | -          | -            |
| Gender                                | -0.029  | -0.499  | -0.021  | -0.375   | -0.006  | -0.110   |               |         |            |              |
| Single & Marr <sup>§</sup>            | 0.052   | 0.690   | 0.070   | 0.958    | 0.068   | 0.922    |               |         |            |              |
| Divo <sup>§</sup> & Marr <sup>§</sup> | -0.020  | -0.316  | -0.014  | -0.224   | -0.007  | -0.117   |               |         |            |              |
| Education                             | -0.045  | -0.750  | -0.064  | -1.092   | -0.066  | -1.133   |               |         |            |              |
| IBS-C & IBS-D                         | 0.024   | 0.381   | 0.018   | 0.300    | 0.009   | 0.144    |               |         |            |              |
| IBS-M & IBS-D                         | 0.022   | 0.356   | -0.012  | -0.194   | -0.025  | -0.408   |               |         |            |              |
| Symptom severity                      | -       | -       | -0.294  | -5.179** | -0.301  | -5.263** | 4.168**       | 0.105** | 26.824**   | 0.084**      |
| Under <sup>§</sup> & Normal           | -       | -       | -       | -        | -0.077  | -1.307   | 3.234**       | 0.112** | 0.772      | 0.007        |
| Over <sup>§</sup> & Normal            | -       | -       | -       | -        | 0.017   | 0.280    |               |         |            |              |
| Obesity & Normal                      | -       | -       | -       | -        | -0.041  | -0.684   |               |         |            |              |

\*  $p < 0.05$ \*\*  $p < 0.01$ 

Model 1 factors: age, gender, family status, education status, IBS subtypes;

Model 2 factors: age, gender, family status, education status, IBS subtypes, symptom severity;

1 Model 3 factors: age, gender, family status, education status, IBS subtypes, symptom severity, BMI  
2 categories.  
3

4 § Marr means “Married or unmarried cohabitation”, Divo means “Divorced or widowed, Under means  
5 “underweight”, Over means “overweight”.  
6  
7

8 IBS-U was not included in the analysis because the sample size is too small.  
9

10 Underweight, BMI < 18.5 kg/m<sup>2</sup>; normal weight, BMI 18.5–25 kg/m<sup>2</sup>; overweight, 25–30 kg/m<sup>2</sup>; obesity,  
11 BMI > 30 kg/m<sup>2</sup>; IBS-C, IBS with constipation; IBS-D, IBS with diarrhea; IBS-M, mixed IBS; BMI, body  
12 mass index  
13  
14  
15  
16  
17  
18  
19  
20  
21  
22  
23  
24  
25  
26  
27  
28  
29  
30  
31  
32  
33  
34  
35  
36  
37  
38  
39  
40  
41  
42  
43  
44  
45  
46  
47  
48  
49  
50  
51  
52  
53  
54  
55  
56  
57  
58  
59  
60



STROBE Statement—Checklist of items that should be included in reports of *cross-sectional studies*

|                              | Item No | Recommendation                                                                                                                                                                                                                                                                                                                                                                                                                    |
|------------------------------|---------|-----------------------------------------------------------------------------------------------------------------------------------------------------------------------------------------------------------------------------------------------------------------------------------------------------------------------------------------------------------------------------------------------------------------------------------|
| <b>Title and abstract</b>    | 1       | (a) Indicate the study's design with a commonly used term in the title or the abstract <b>【Page 1】</b><br>(b) Provide in the abstract an informative and balanced summary of what was done and what was found <b>【Pages 2 - 3】</b>                                                                                                                                                                                                |
| <b>Introduction</b>          |         |                                                                                                                                                                                                                                                                                                                                                                                                                                   |
| Background/rationale         | 2       | Explain the scientific background and rationale for the investigation being reported <b>【Pages 4】</b>                                                                                                                                                                                                                                                                                                                             |
| Objectives                   | 3       | State specific objectives, including any prespecified hypotheses <b>【Pages 4】</b>                                                                                                                                                                                                                                                                                                                                                 |
| <b>Methods</b>               |         |                                                                                                                                                                                                                                                                                                                                                                                                                                   |
| Study design                 | 4       | Present key elements of study design early in the paper <b>【Pages 5 - 7】</b>                                                                                                                                                                                                                                                                                                                                                      |
| Setting                      | 5       | Describe the setting, locations, and relevant dates, including periods of recruitment, exposure, follow-up, and data collection <b>【Page 5 - 7】</b>                                                                                                                                                                                                                                                                               |
| Participants                 | 6       | (a) Give the eligibility criteria, and the sources and methods of selection of participants <b>【Page 5】</b>                                                                                                                                                                                                                                                                                                                       |
| Variables                    | 7       | Clearly define all outcomes, exposures, predictors, potential confounders, and effect modifiers. Give diagnostic criteria, if applicable <b>【Pages 6 - 7】</b>                                                                                                                                                                                                                                                                     |
| Data sources/<br>measurement | 8*      | For each variable of interest, give sources of data and details of methods of assessment (measurement). Describe comparability of assessment methods if there is more than one group <b>【Pages 6 - 7】</b>                                                                                                                                                                                                                         |
| Bias                         | 9       | Describe any efforts to address potential sources of bias <b>【Page 5】</b>                                                                                                                                                                                                                                                                                                                                                         |
| Study size                   | 10      | Explain how the study size was arrived at <b>【Page 5】</b>                                                                                                                                                                                                                                                                                                                                                                         |
| Quantitative variables       | 11      | Explain how quantitative variables were handled in the analyses. If applicable, describe which groupings were chosen and why <b>【Pages 6 - 7】</b>                                                                                                                                                                                                                                                                                 |
| Statistical methods          | 12      | (a) Describe all statistical methods, including those used to control for confounding <b>【Pages 6 - 7】</b><br>(b) Describe any methods used to examine subgroups and interactions <b>【Page 6 - 7】</b><br>(c) Explain how missing data were addressed <b>【Page 6 - 7】</b><br>(d) If applicable, describe analytical methods taking account of sampling strategy <b>【N/A】</b><br>(e) Describe any sensitivity analyses <b>【N/A】</b> |
| <b>Results</b>               |         |                                                                                                                                                                                                                                                                                                                                                                                                                                   |
| Participants                 | 13*     | (a) Report numbers of individuals at each stage of study—eg numbers potentially eligible, examined for eligibility, confirmed eligible, included in the study, completing follow-up, and analysed <b>【Page 8; table 1】</b><br>(b) Give reasons for non-participation at each stage <b>【N/A】</b><br>(c) Consider use of a flow diagram <b>【N/A】</b>                                                                                |
| Descriptive data             | 14*     | (a) Give characteristics of study participants (eg demographic, clinical, social) and information on exposures and potential confounders <b>【Pages 8-9】</b><br>(b) Indicate number of participants with missing data for each variable of interest <b>【Page 8; table 1】</b>                                                                                                                                                       |
| Outcome data                 | 15*     | Report numbers of outcome events or summary measures <b>【Pages 8-9, table 1-3】</b>                                                                                                                                                                                                                                                                                                                                                |
| Main results                 | 16      | (a) Give unadjusted estimates and, if applicable, confounder-adjusted estimates and their precision (eg, 95% confidence interval). Make clear which confounders were adjusted for and why they were included <b>【Pages 8-9; table 1-3】</b>                                                                                                                                                                                        |

|                          |    |                                                                                                                                                                                                 |
|--------------------------|----|-------------------------------------------------------------------------------------------------------------------------------------------------------------------------------------------------|
|                          |    | (b) Report category boundaries when continuous variables were categorized <b>【N/A】</b>                                                                                                          |
|                          |    | (c) If relevant, consider translating estimates of relative risk into absolute risk for a meaningful time period <b>【N/A】</b>                                                                   |
| Other analyses           | 17 | Report other analyses done—eg analyses of subgroups and interactions, and sensitivity analyses <b>【N/A】</b>                                                                                     |
| <b>Discussion</b>        |    |                                                                                                                                                                                                 |
| Key results              | 18 | Summarise key results with reference to study objectives <b>【Page 10-12】</b>                                                                                                                    |
| Limitations              | 19 | Discuss limitations of the study, taking into account sources of potential bias or imprecision. Discuss both direction and magnitude of any potential bias <b>【Page 11】</b>                     |
| Interpretation           | 20 | Give a cautious overall interpretation of results considering objectives, limitations, multiplicity of analyses, results from similar studies, and other relevant evidence <b>【Pages 10-12】</b> |
| Generalisability         | 21 | Discuss the generalisability (external validity) of the study results <b>【Pages 10-12】</b>                                                                                                      |
| <b>Other information</b> |    |                                                                                                                                                                                                 |
| Funding                  | 22 | Give the source of funding and the role of the funders for the present study and, if applicable, for the original study on which the present article is based <b>【Page 17】</b>                  |

\*Give information separately for exposed and unexposed groups.

**Note:** An Explanation and Elaboration article discusses each checklist item and gives methodological background and published examples of transparent reporting. The STROBE checklist is best used in conjunction with this article (freely available on the Web sites of PLoS Medicine at <http://www.plosmedicine.org/>, Annals of Internal Medicine at <http://www.annals.org/>, and Epidemiology at <http://www.epidem.com/>). Information on the STROBE Initiative is available at [www.strobe-statement.org](http://www.strobe-statement.org).
